# Supplementary material for: Squaramide-catalysed enantionselective Mannich reaction of imines bearing a heterocycle with malonates
Source: Royal Society of Chemistry journal article supplement (doi:10.1039/c3ra43260b), 2013-01-01
Supplement: c3ra43260b.pdf [file c3ra43260b.pdf]

# **Squaramide-catalysed Enantioselective Mannich Reaction of Imines Bearing a heterocycle with malonates**

Hai-Xiao He and Da-Ming Du\*

*School of Chemical Engineering and Environment, Beijing Institute of Technology,  
Beijing 100081, People's Republic of China*  
[dudm@bit.edu.cn](mailto:dudm@bit.edu.cn)

## ***Supporting Information***

### **Contents**

|                                                                              |     |
|------------------------------------------------------------------------------|-----|
| Copies of $^1\text{H}$ and $^{13}\text{C}$ NMR spectra of new compounds..... | S1  |
| Copies of HPLC chromatographs of Mannich products.....                       | S26 |



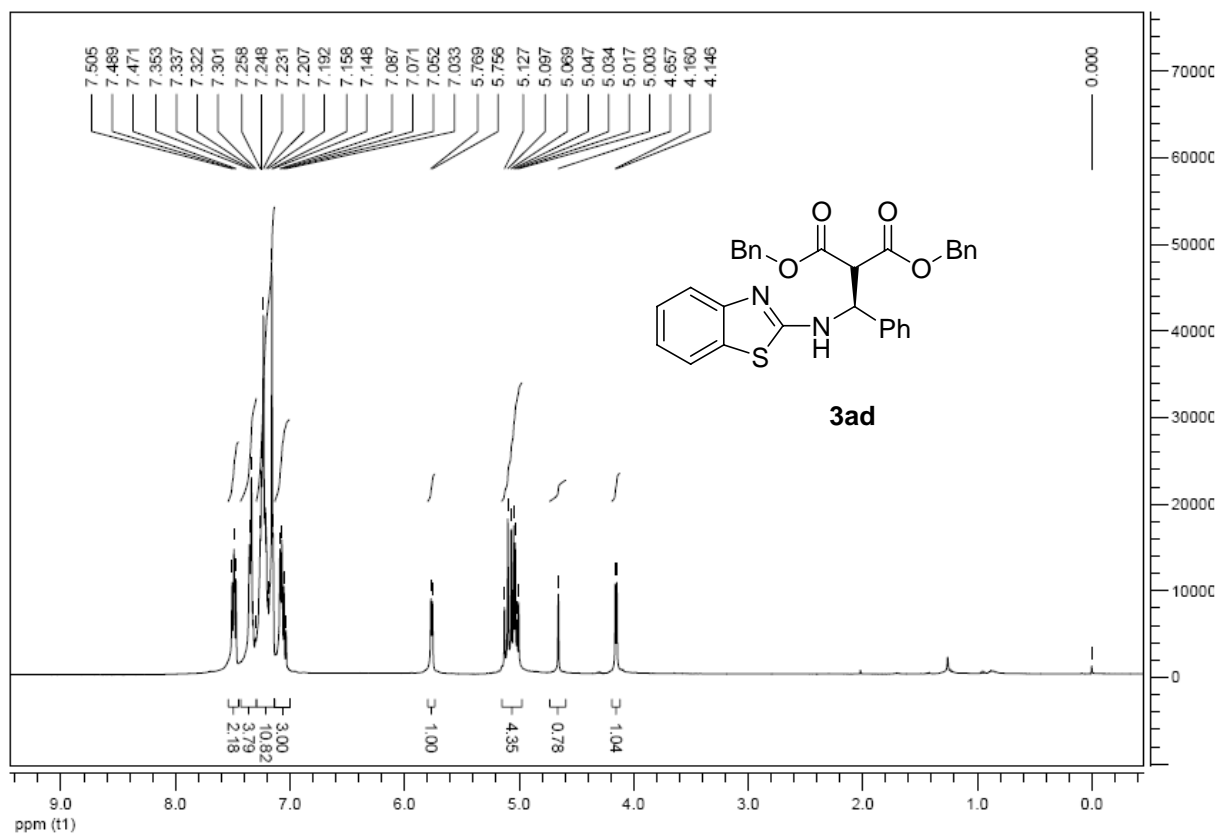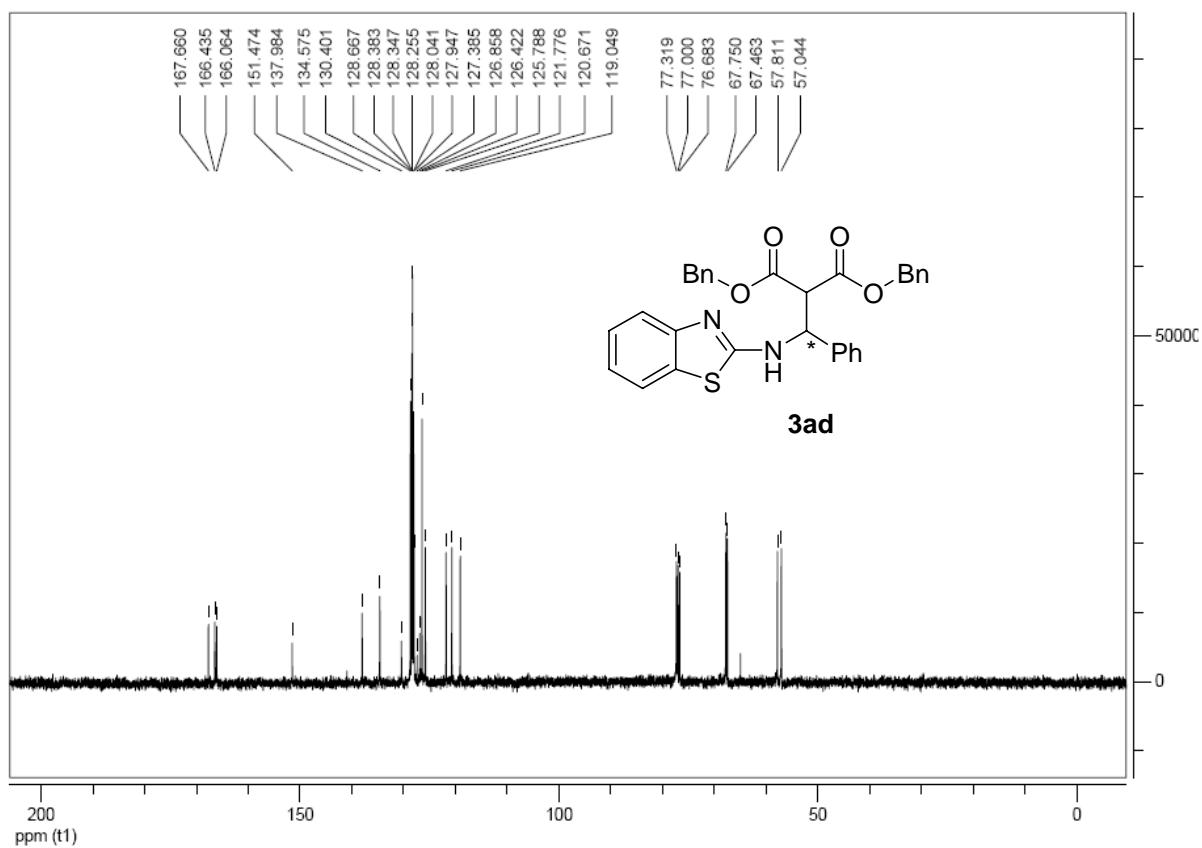

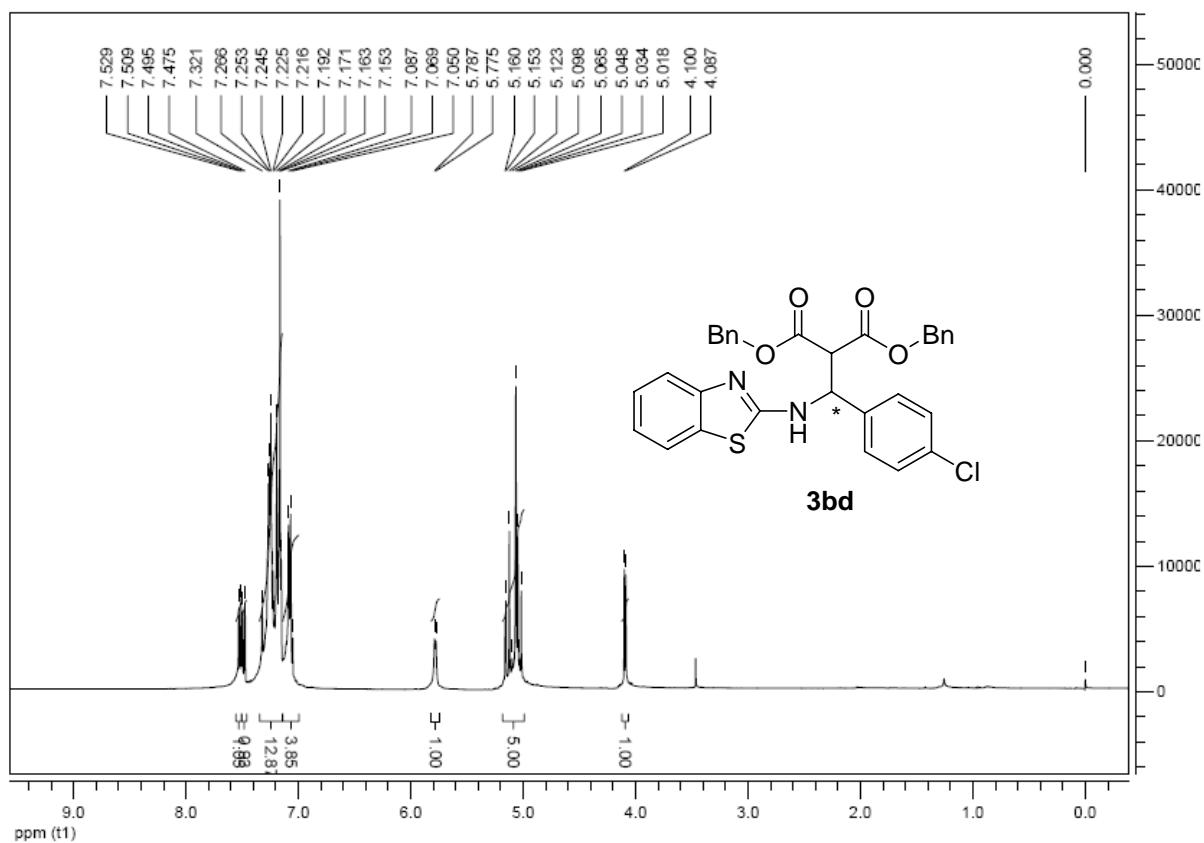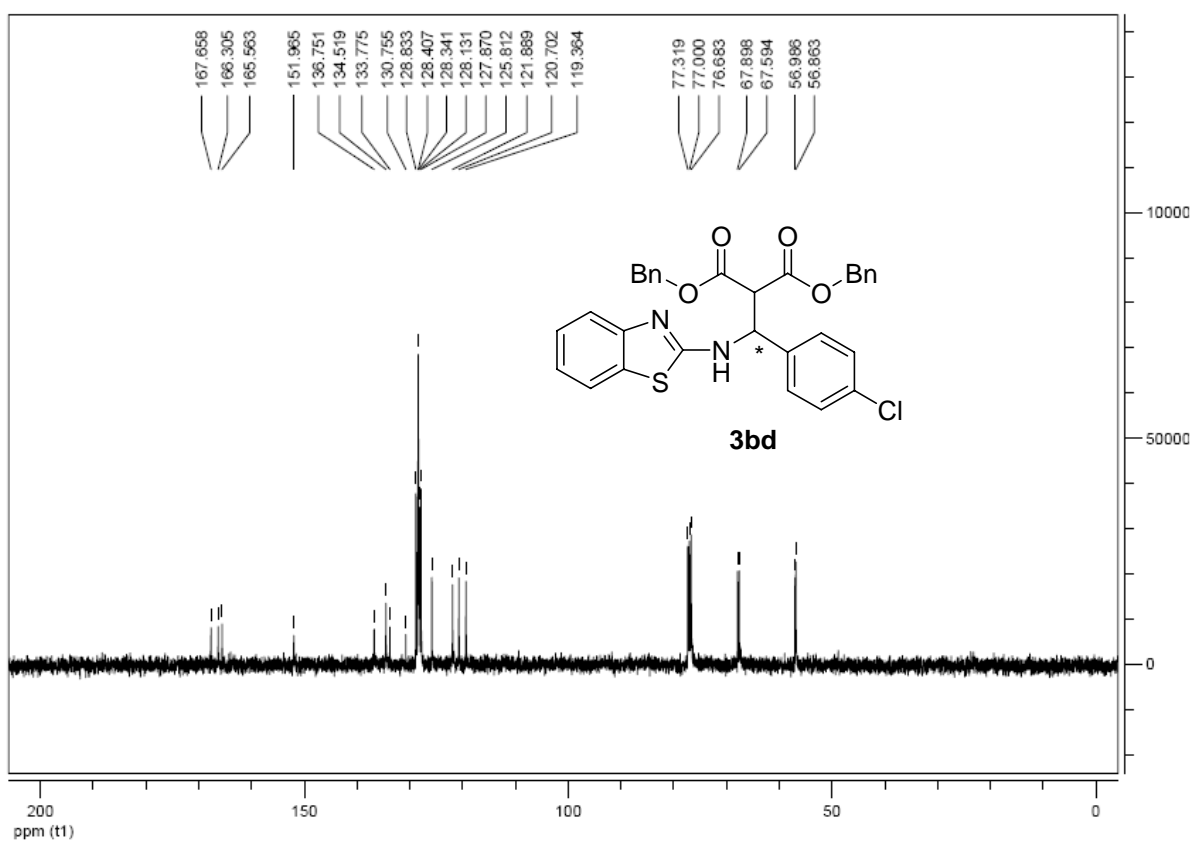

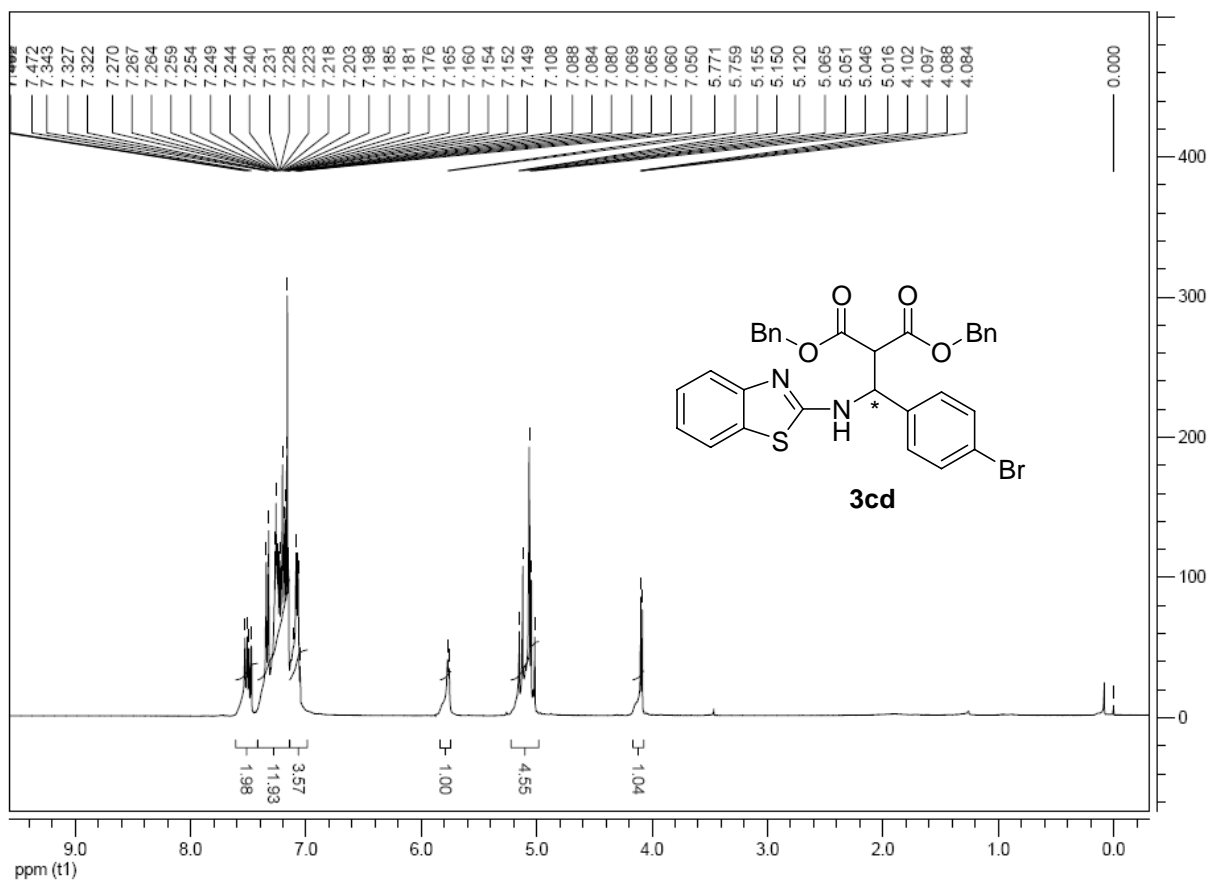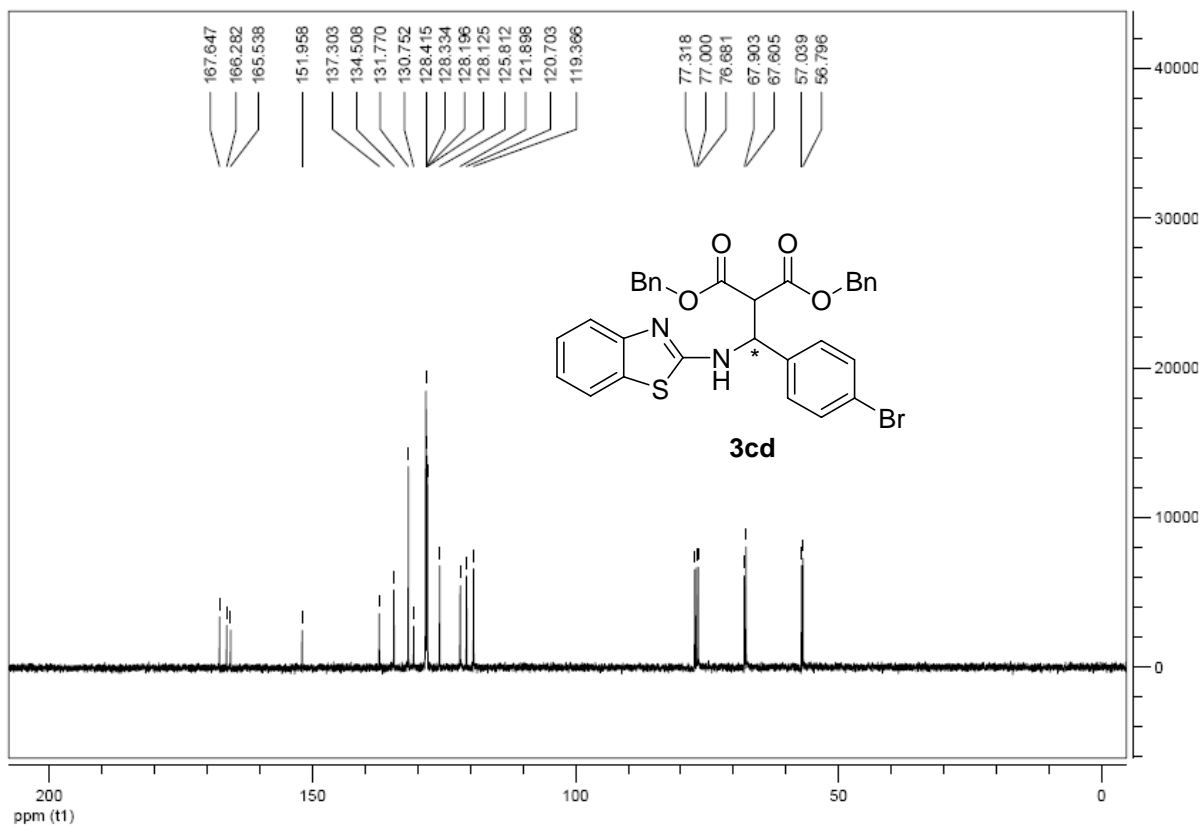

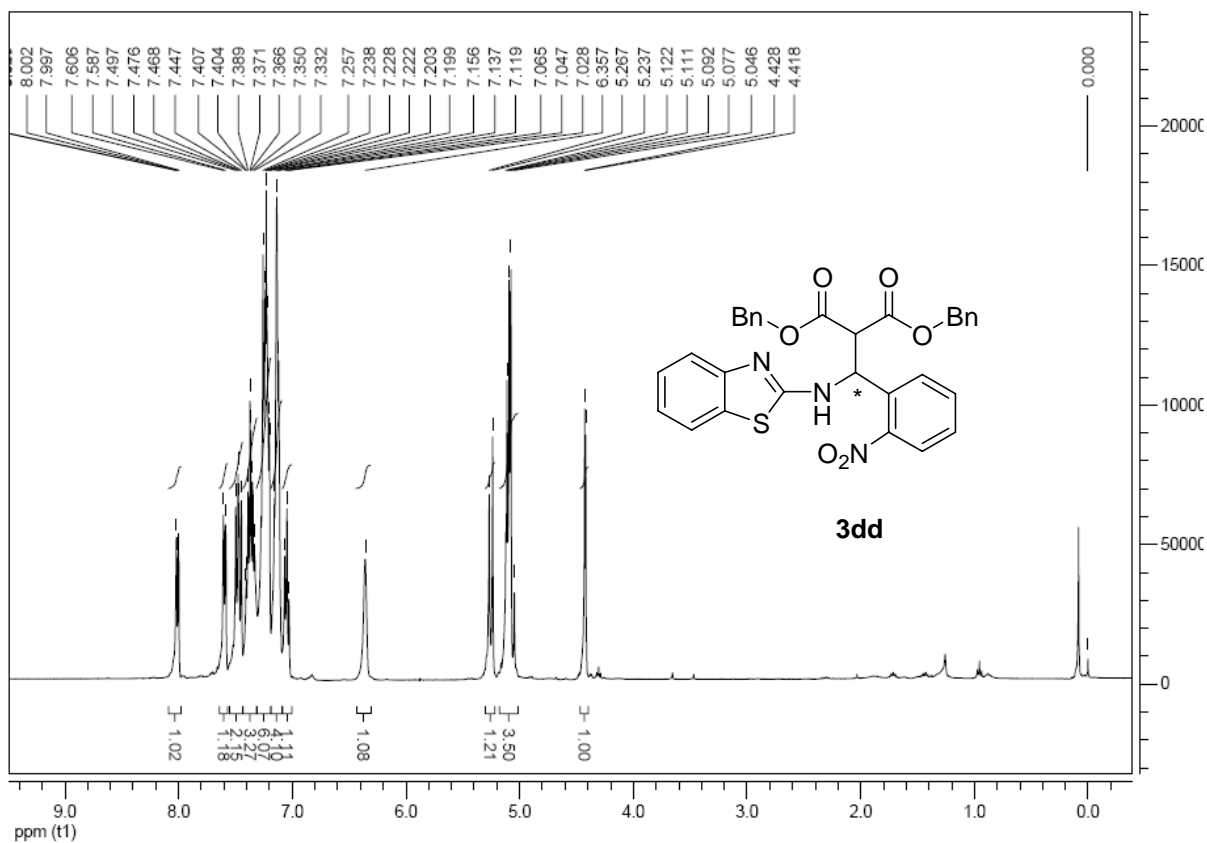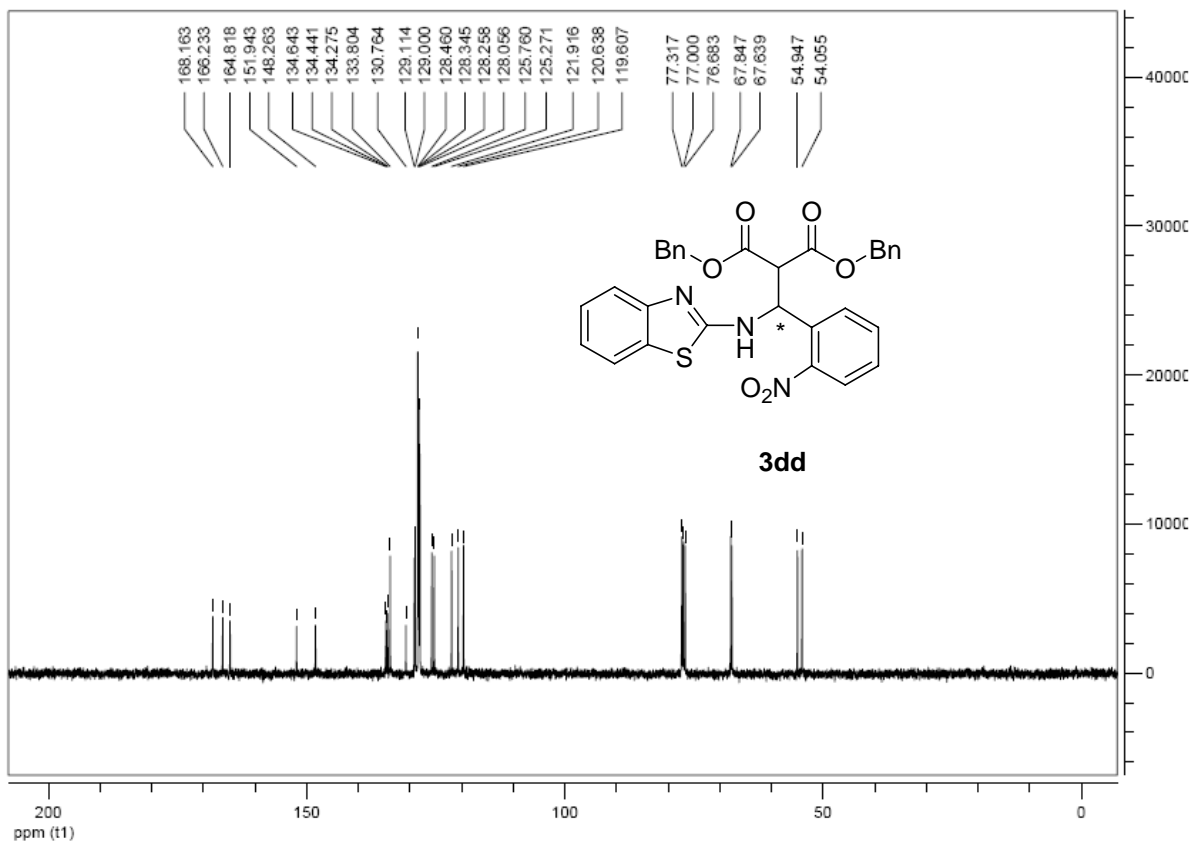

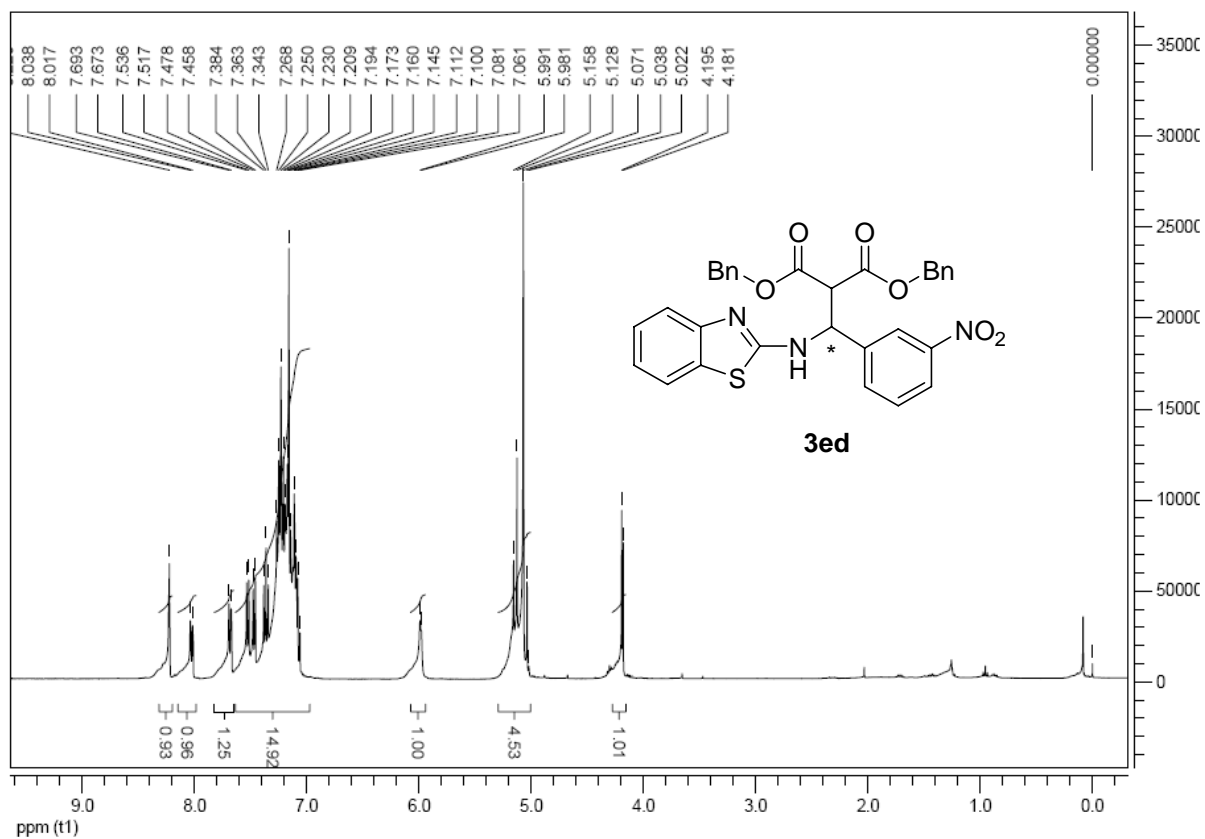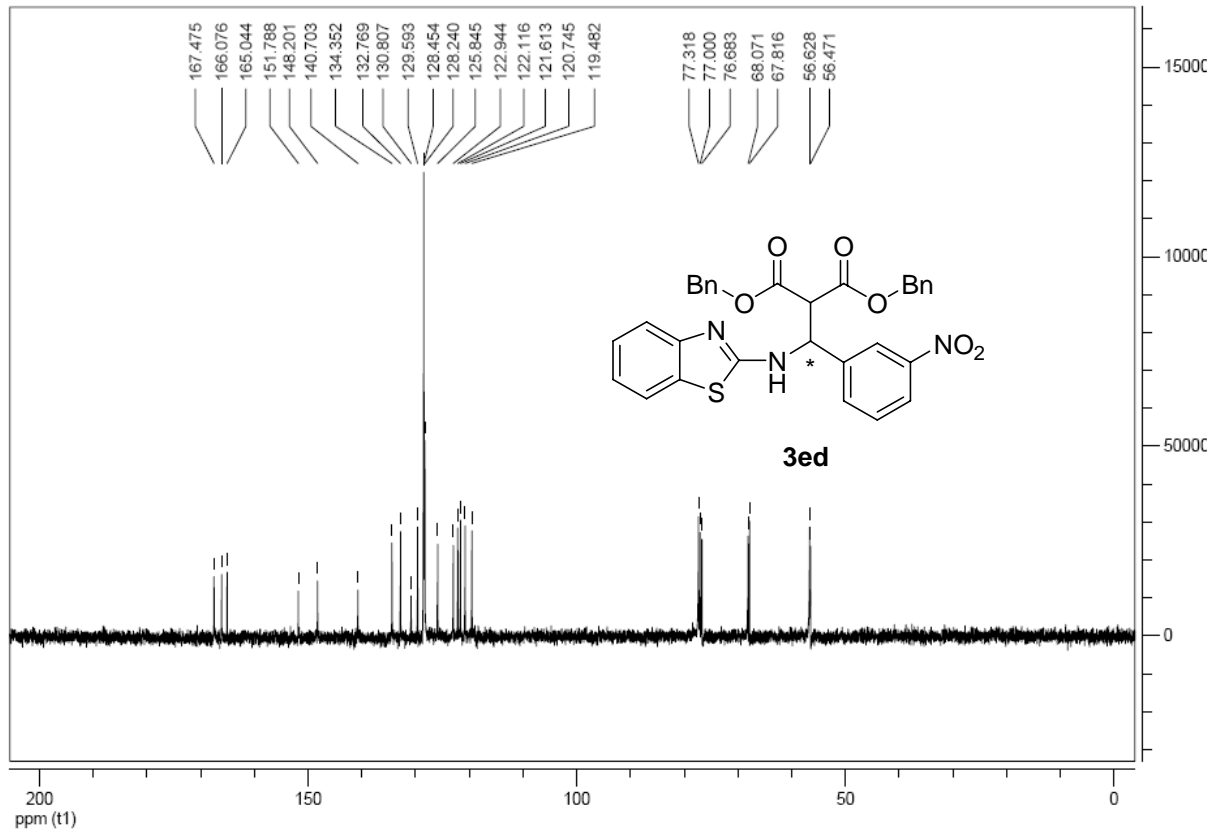

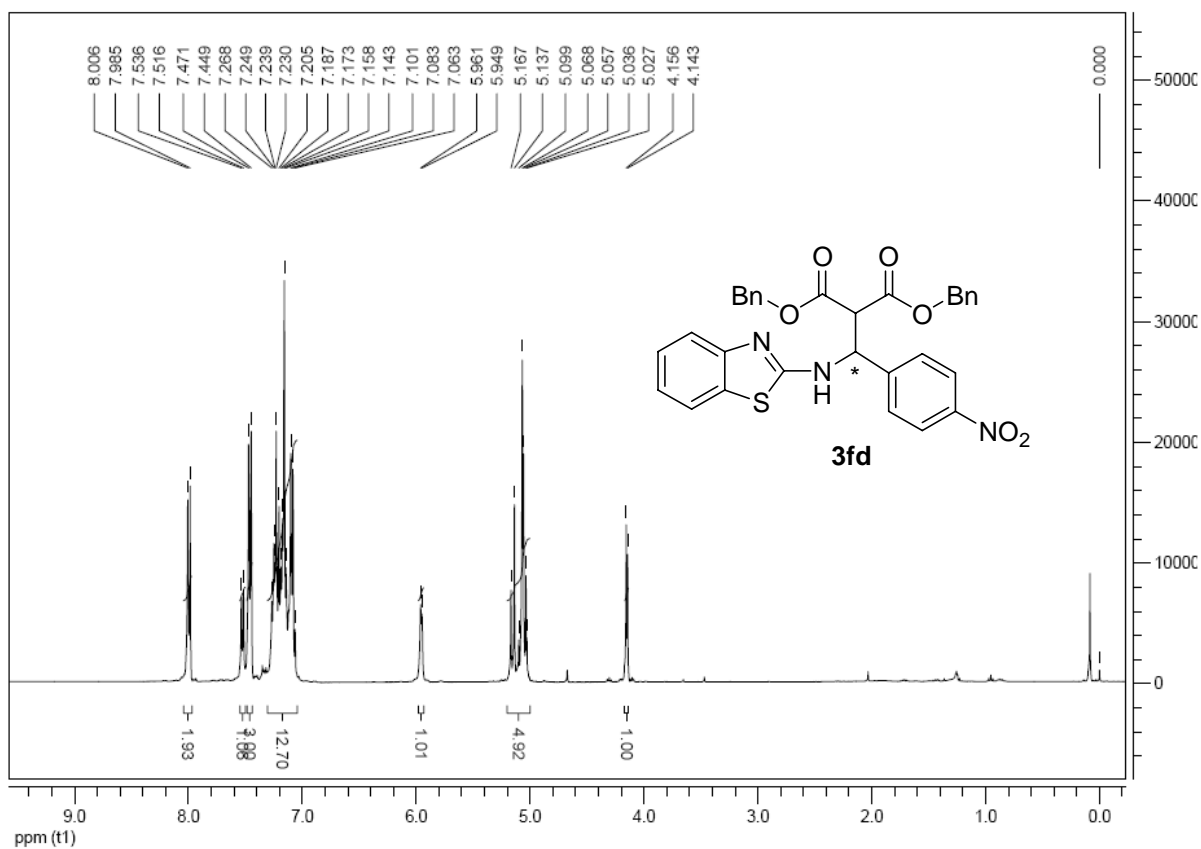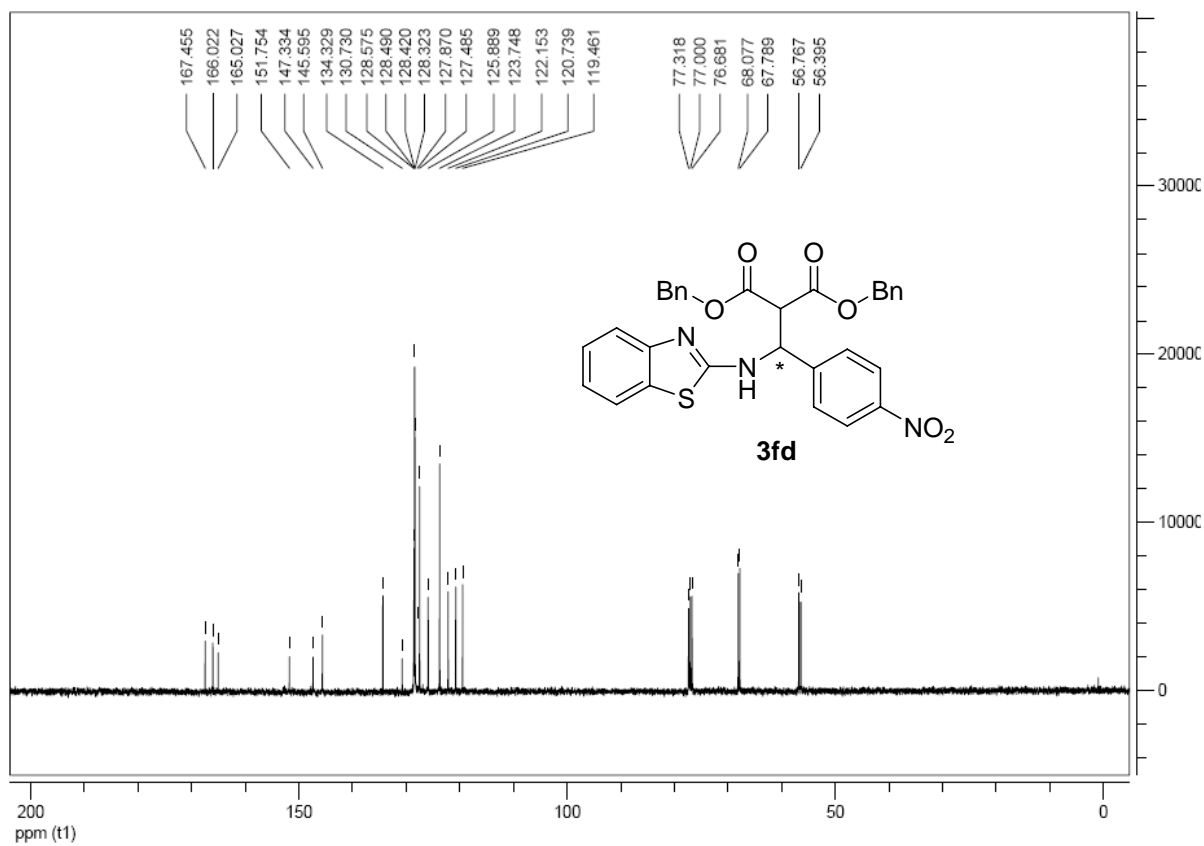



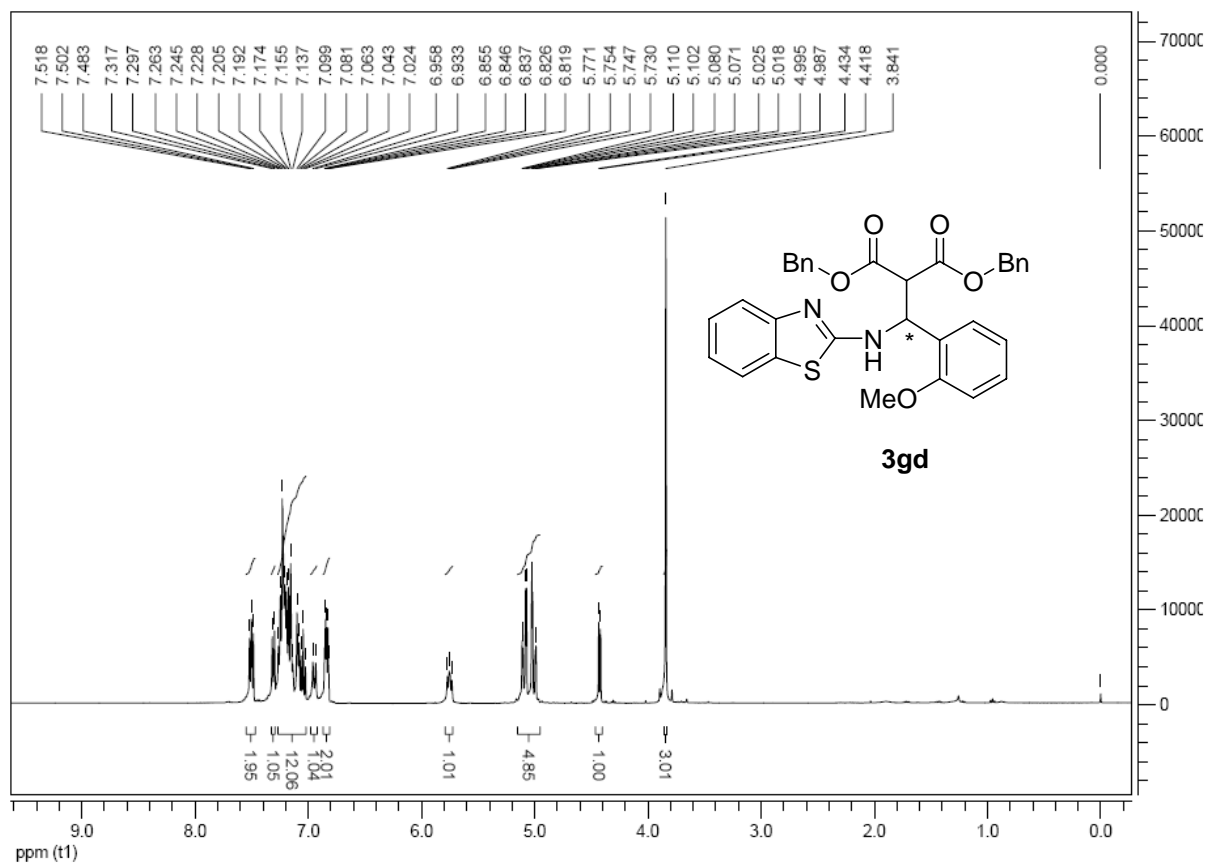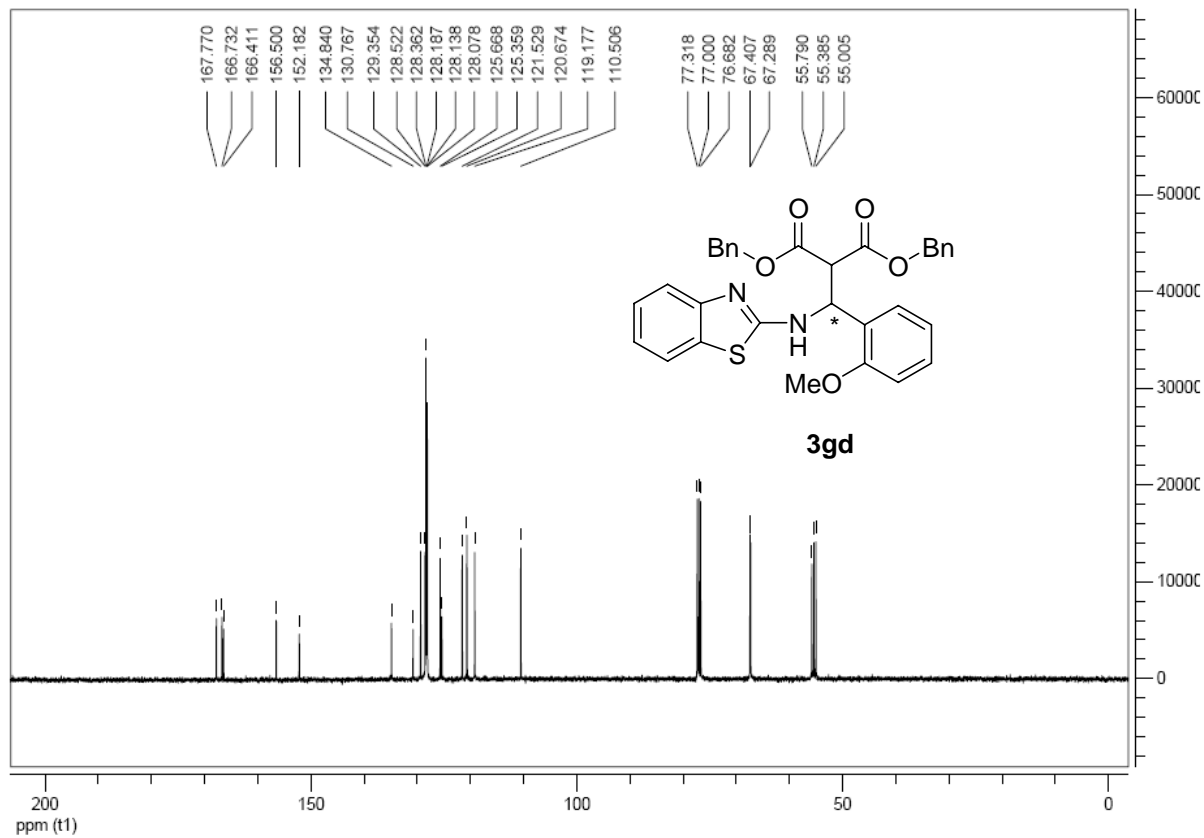

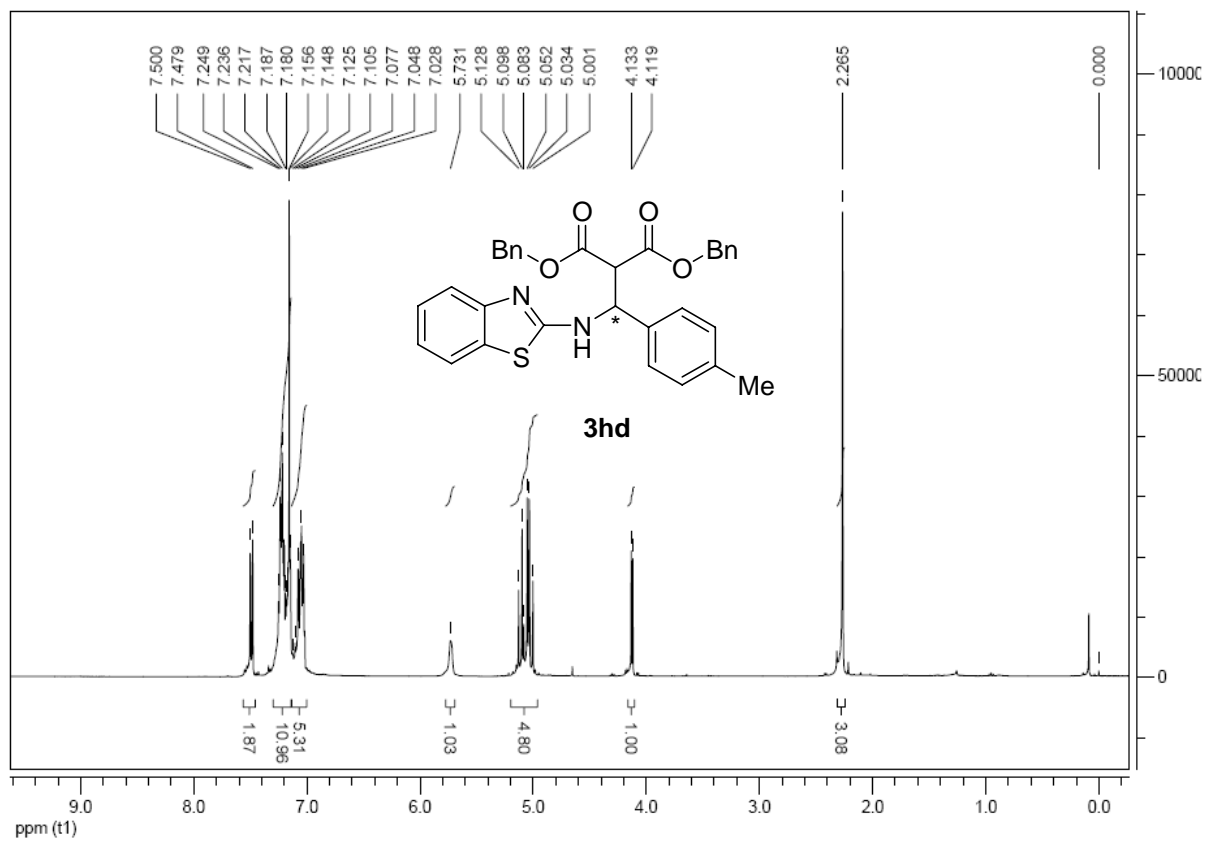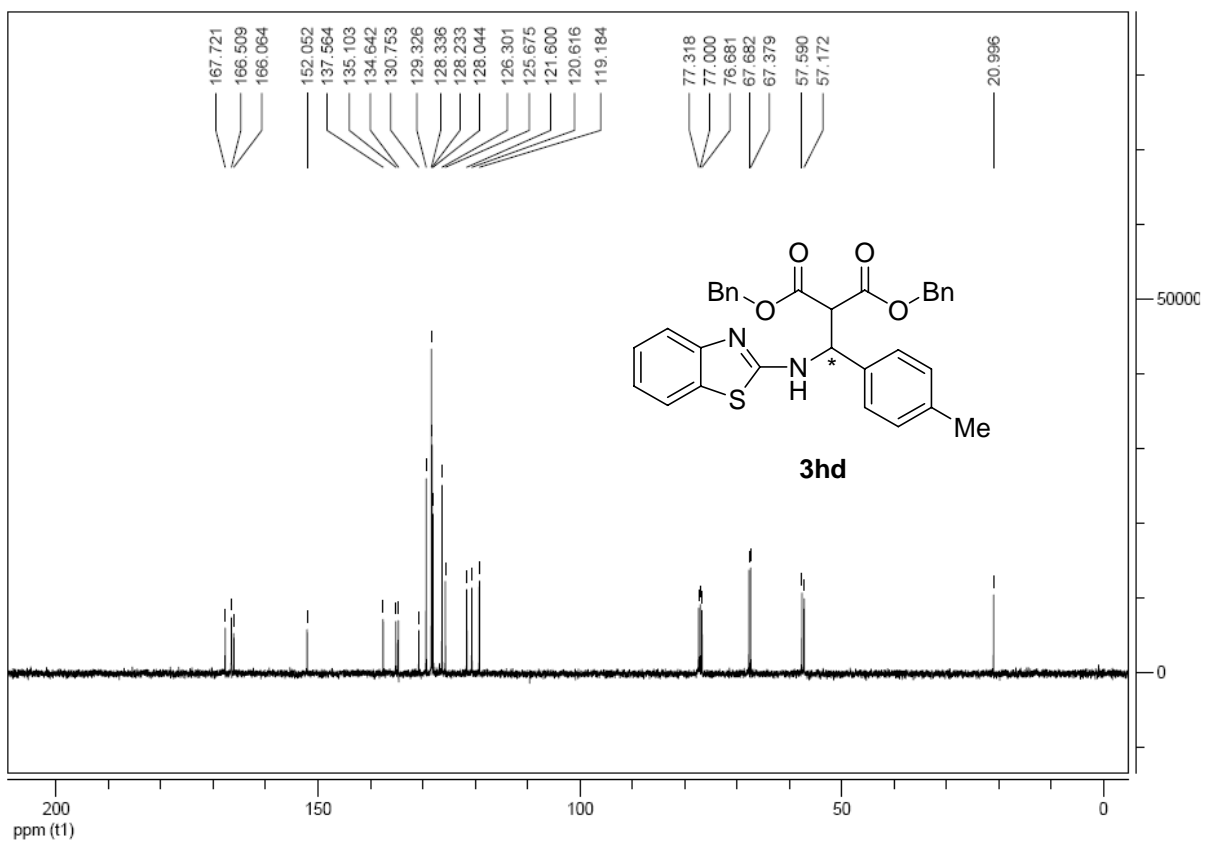

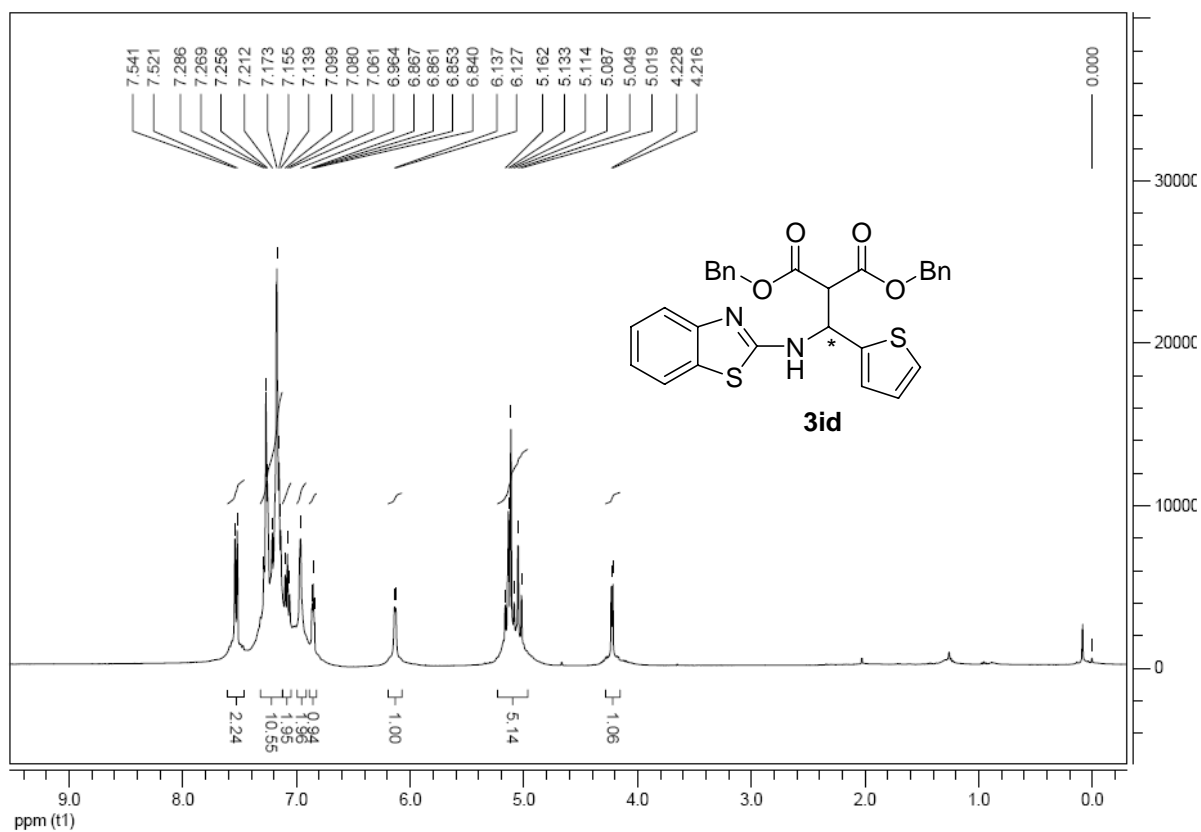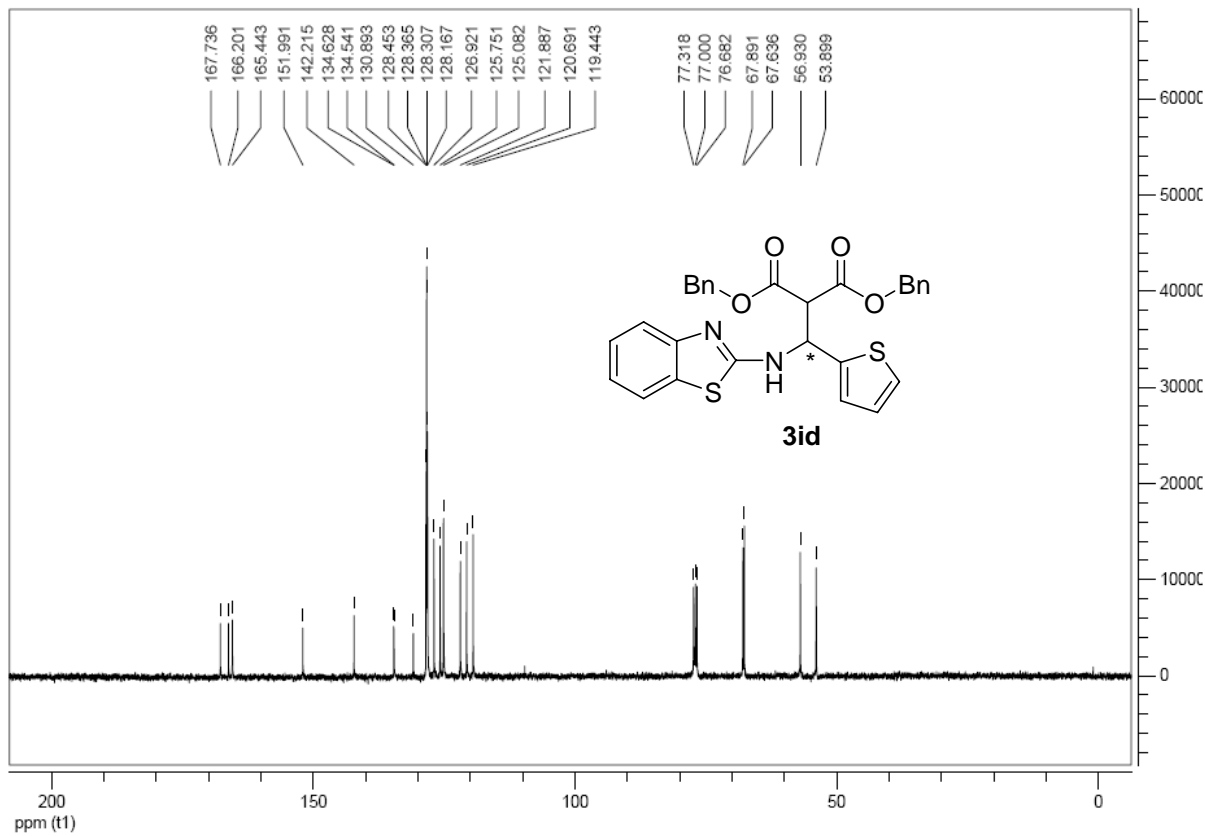

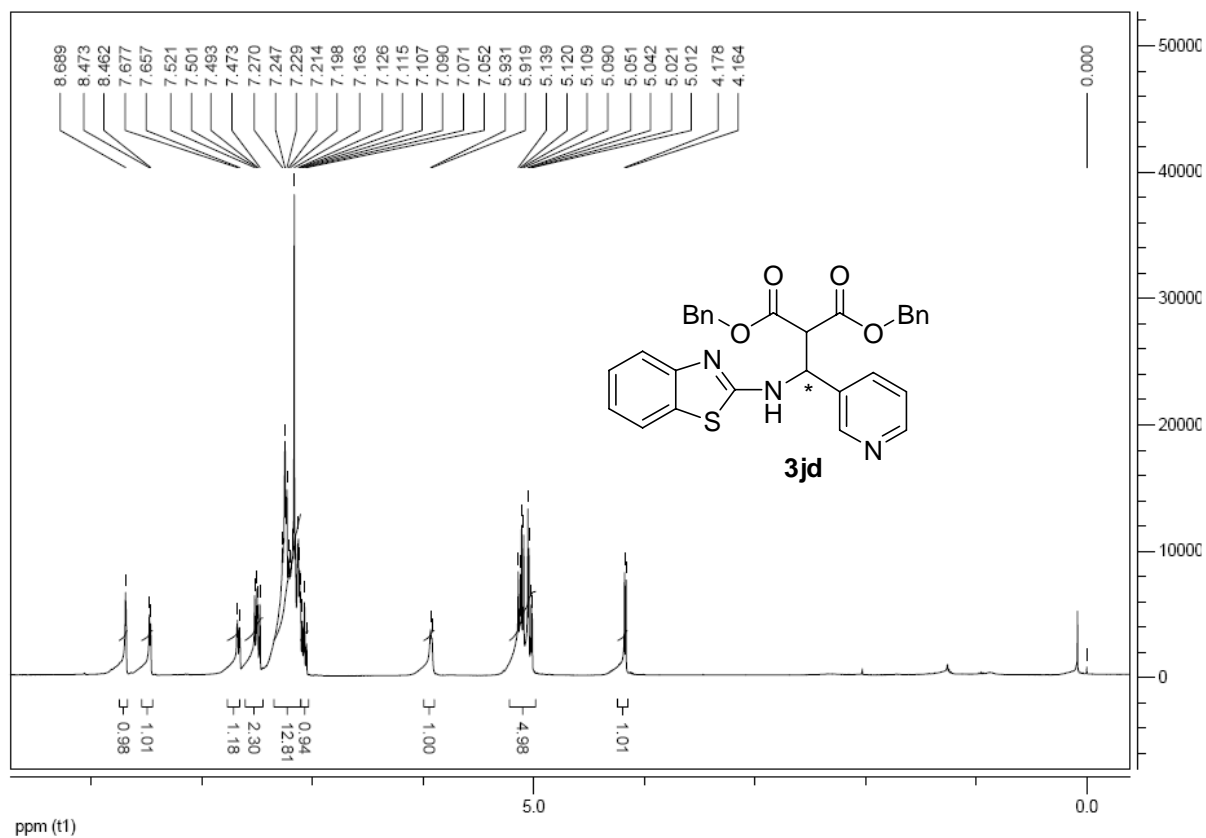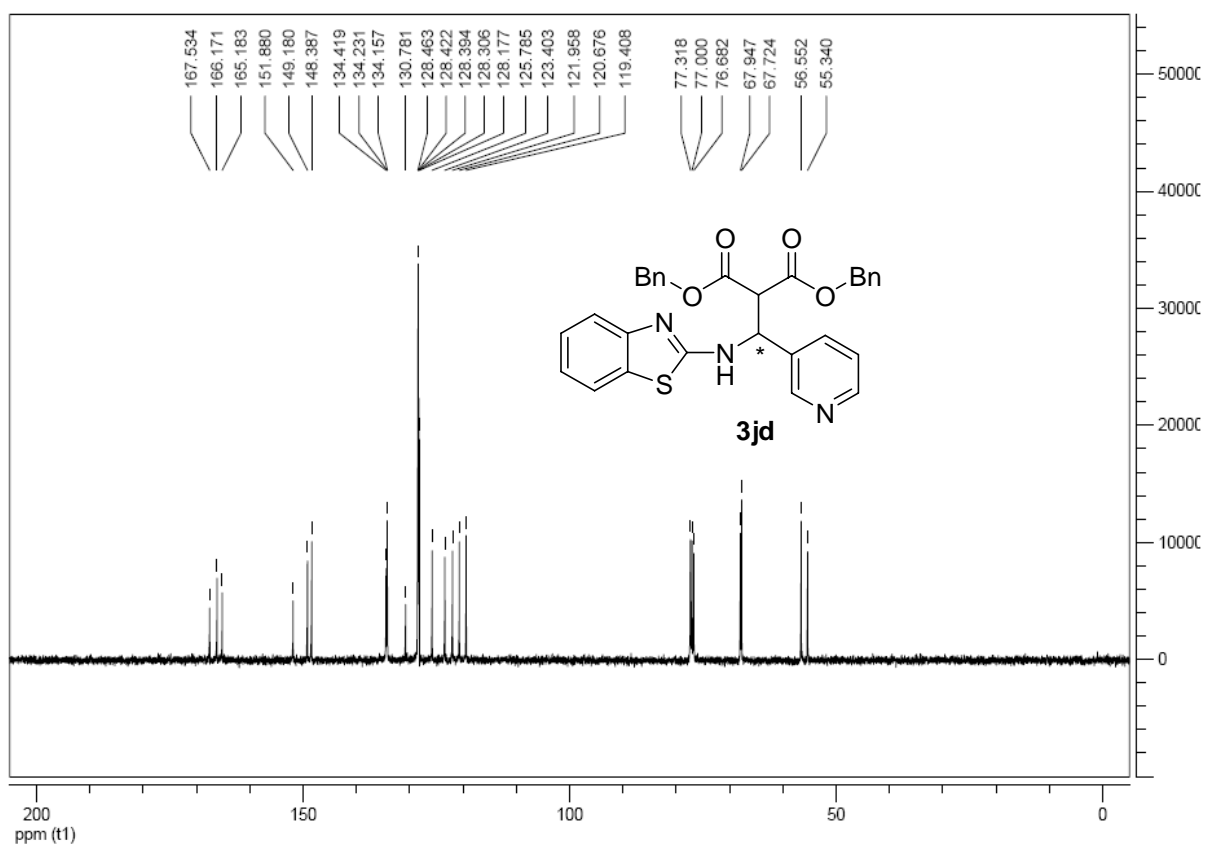

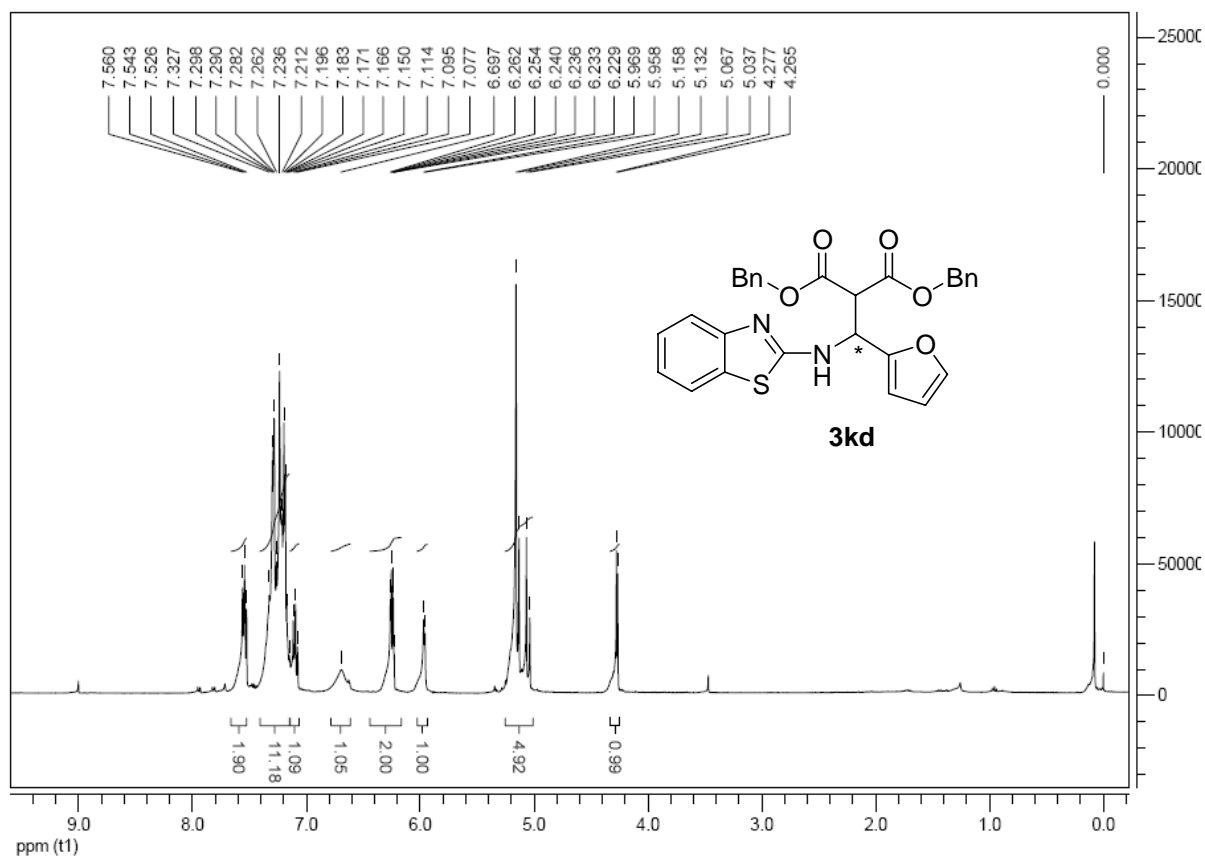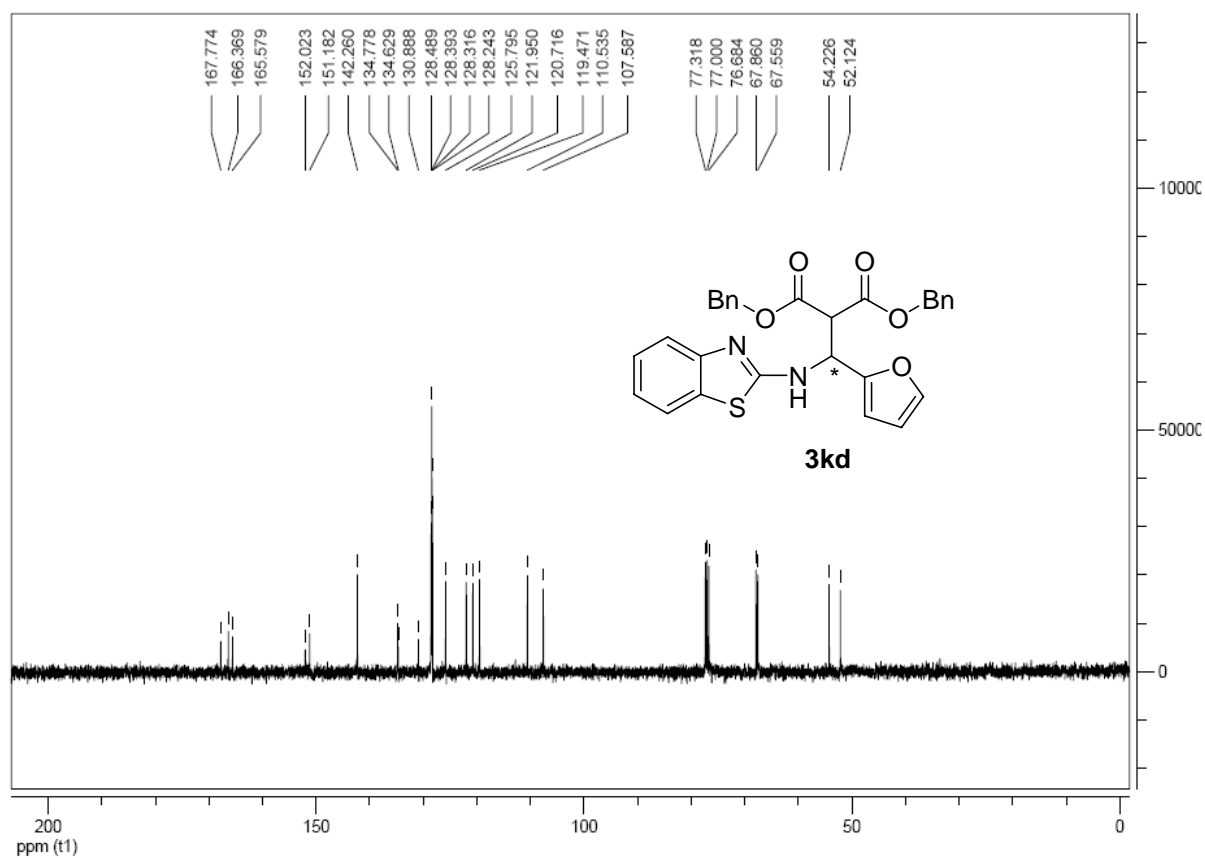

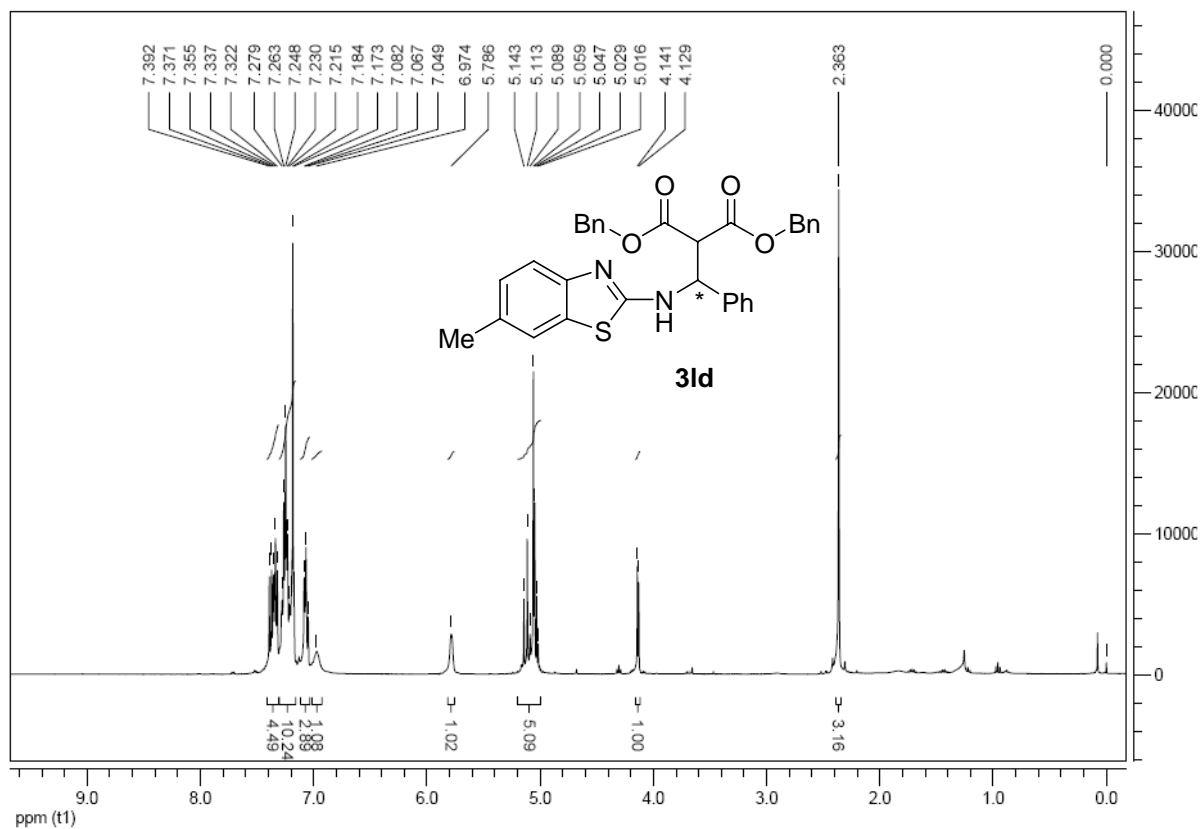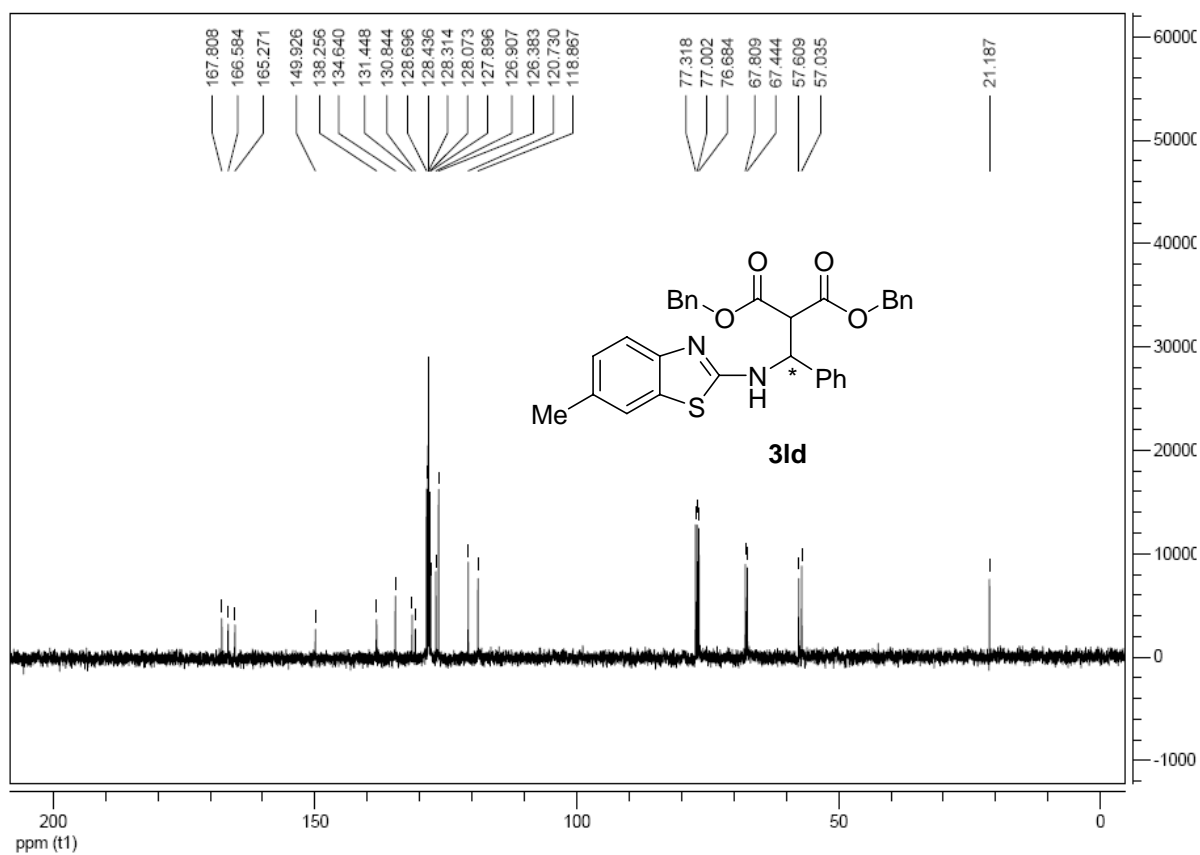

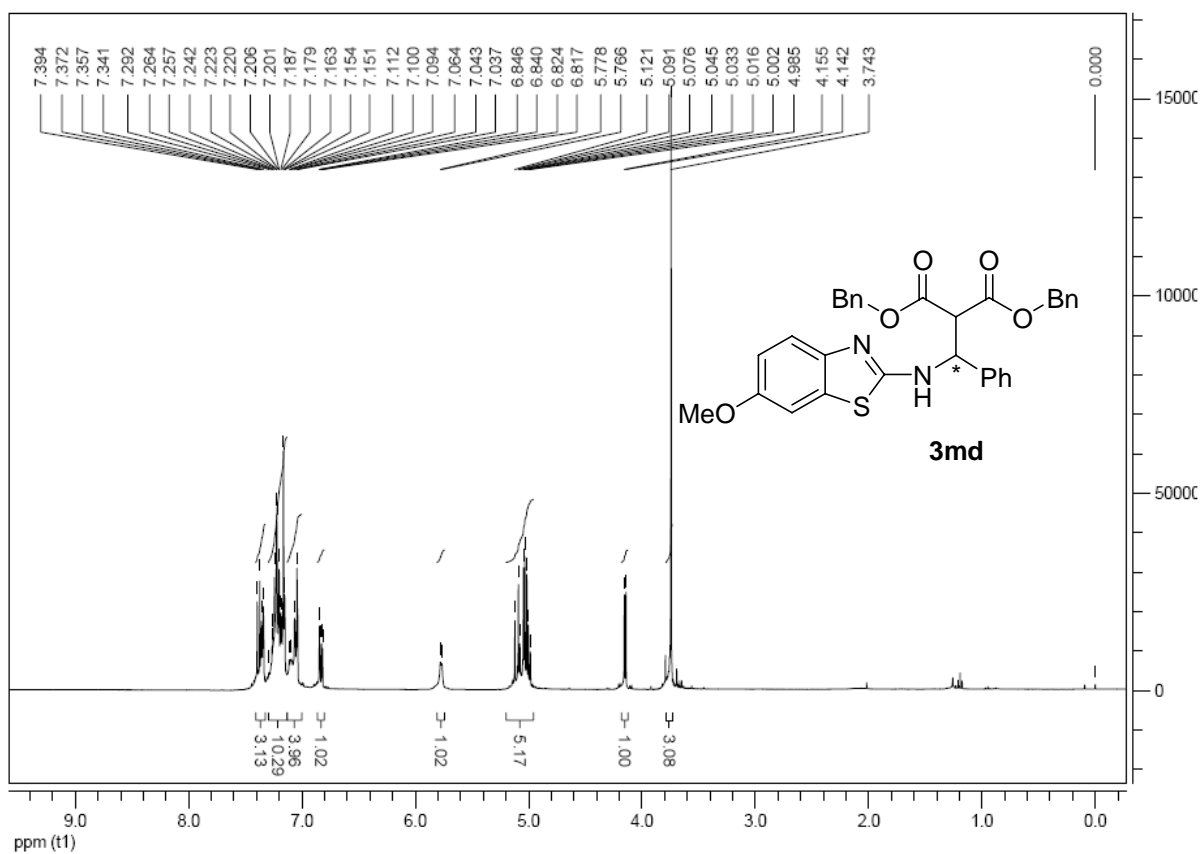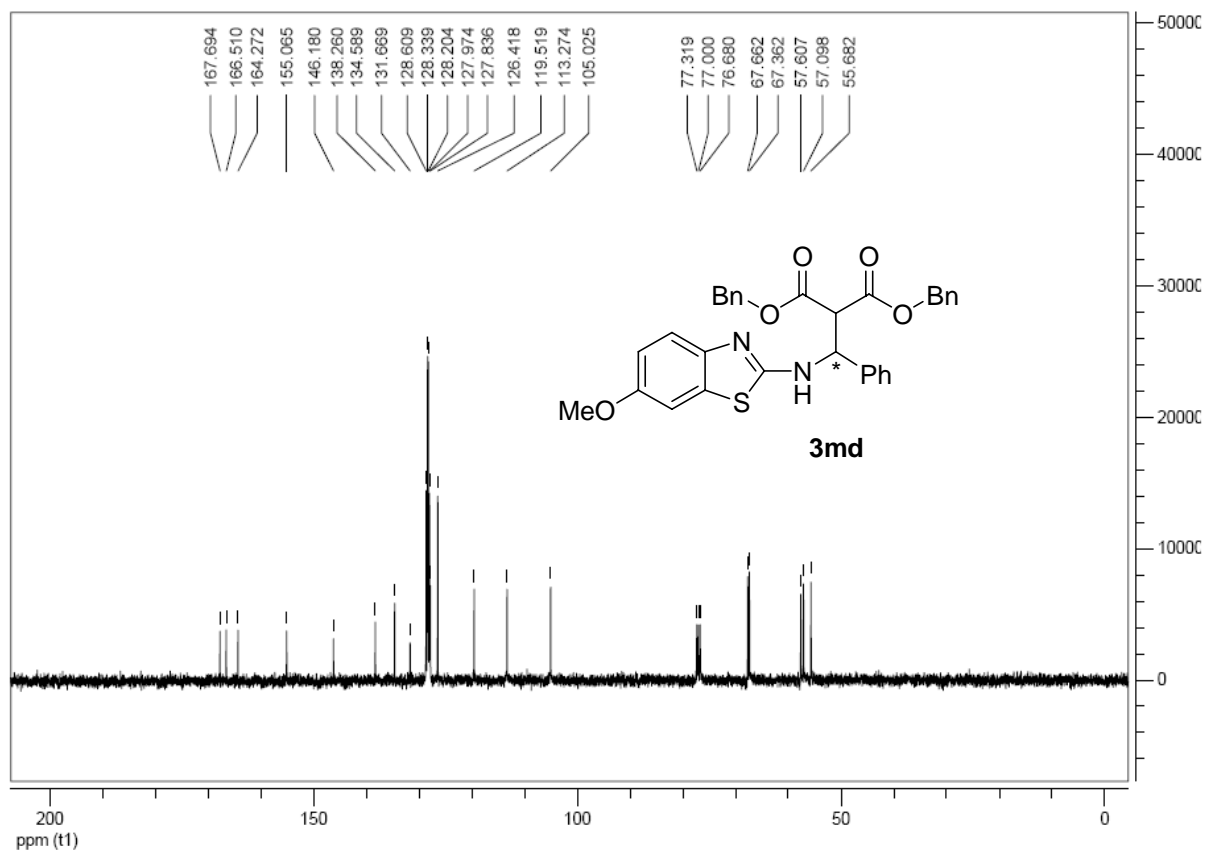

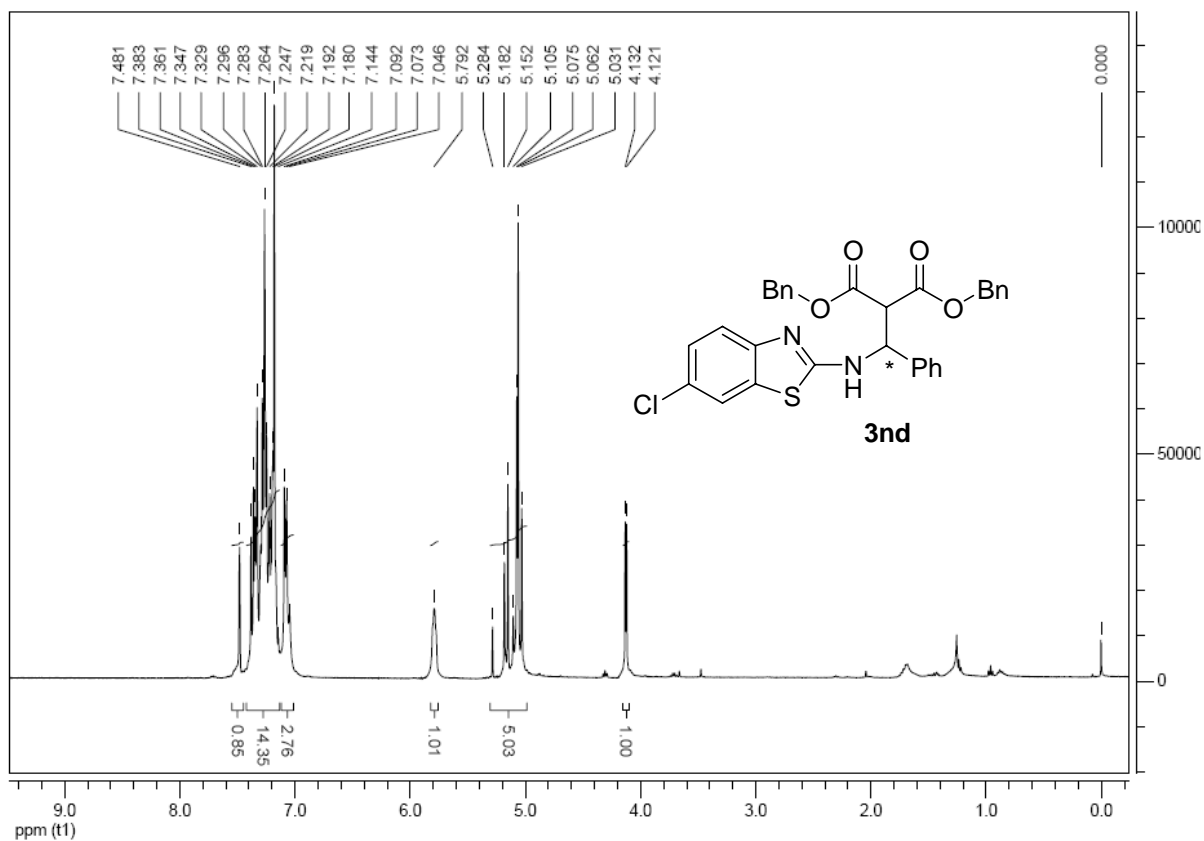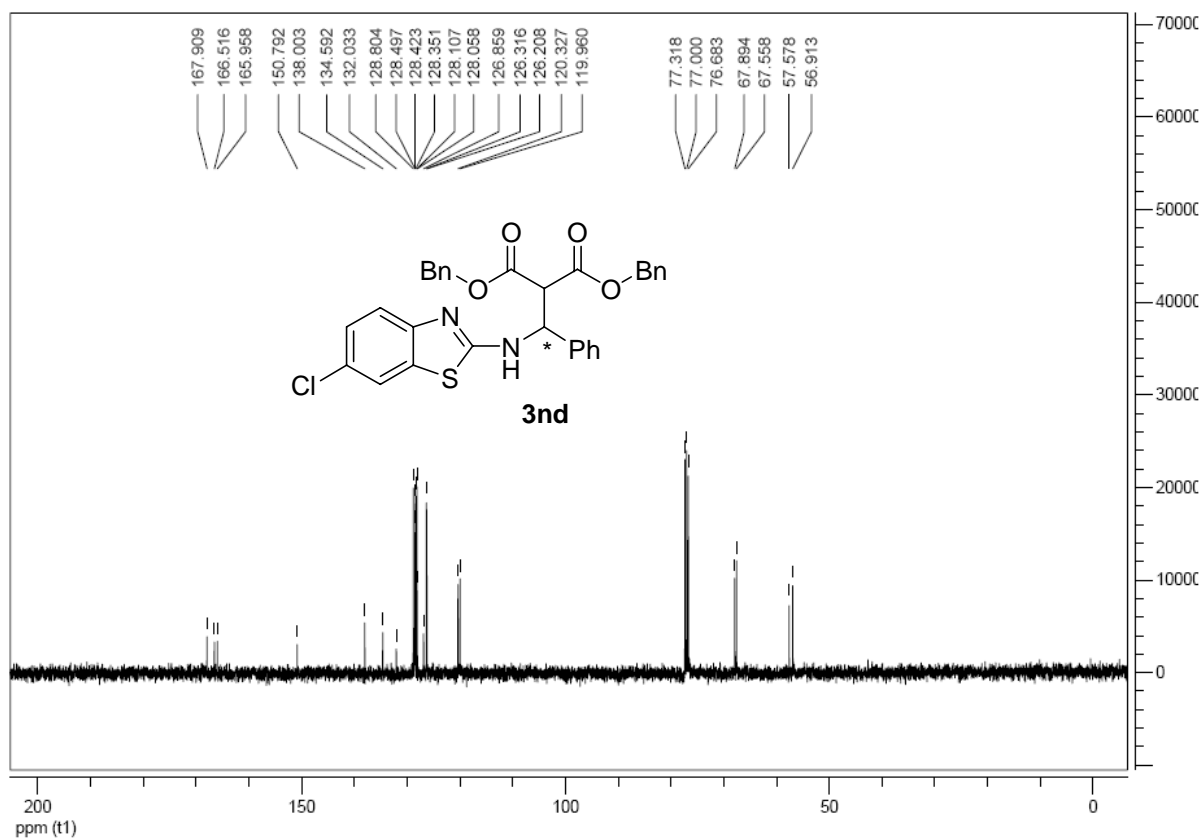



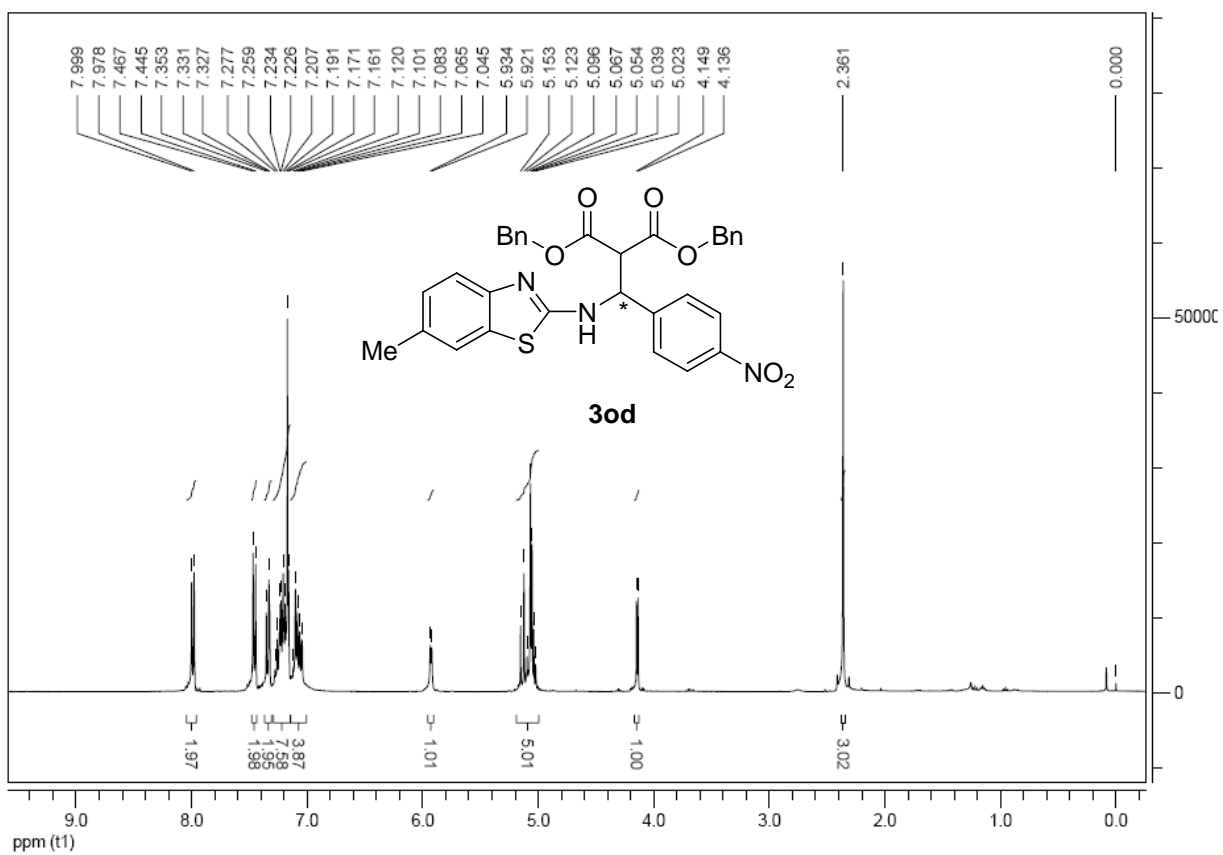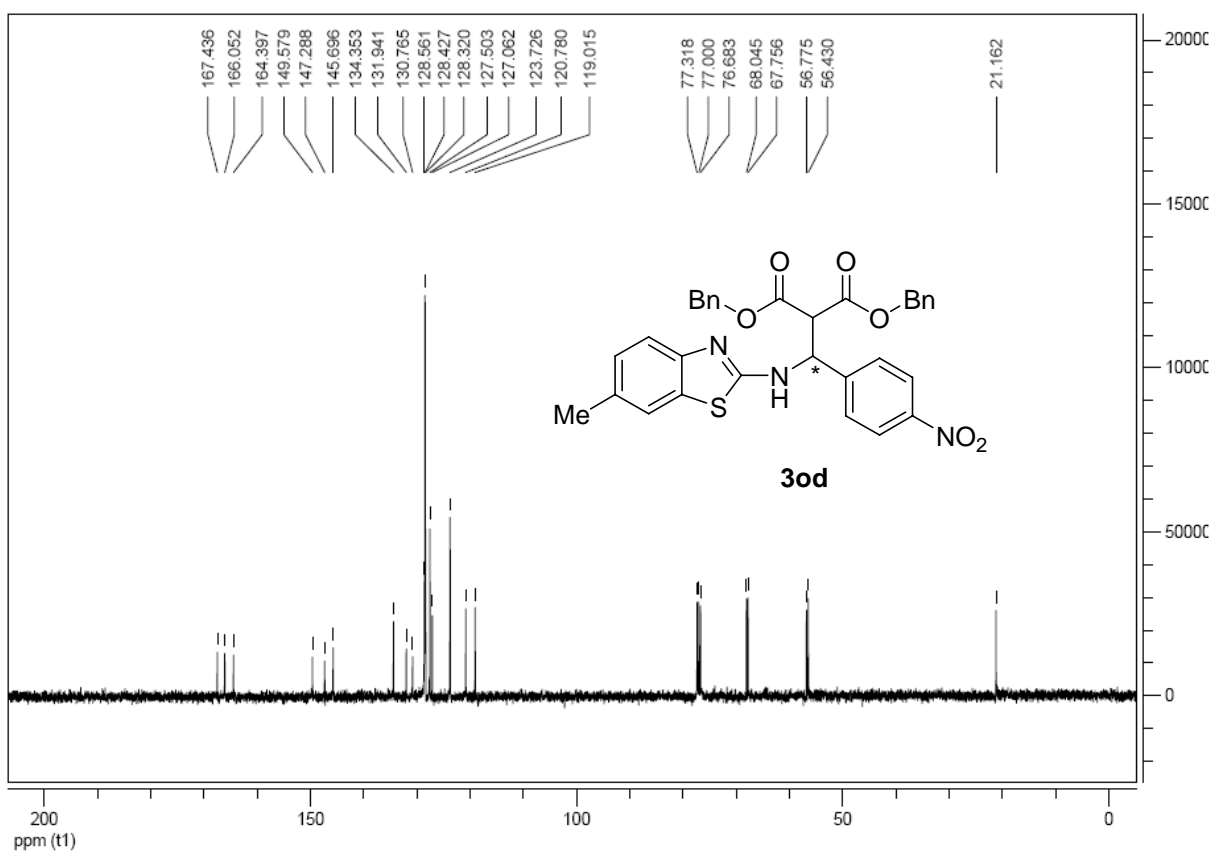

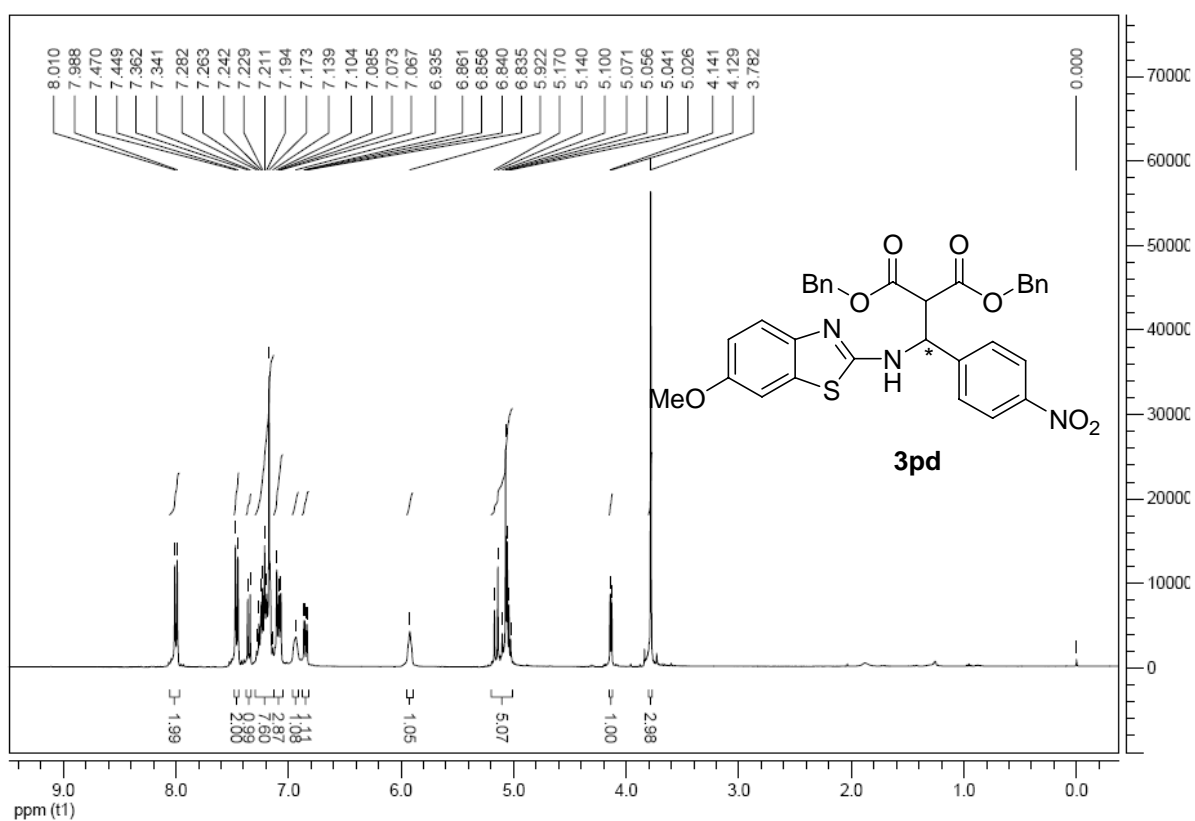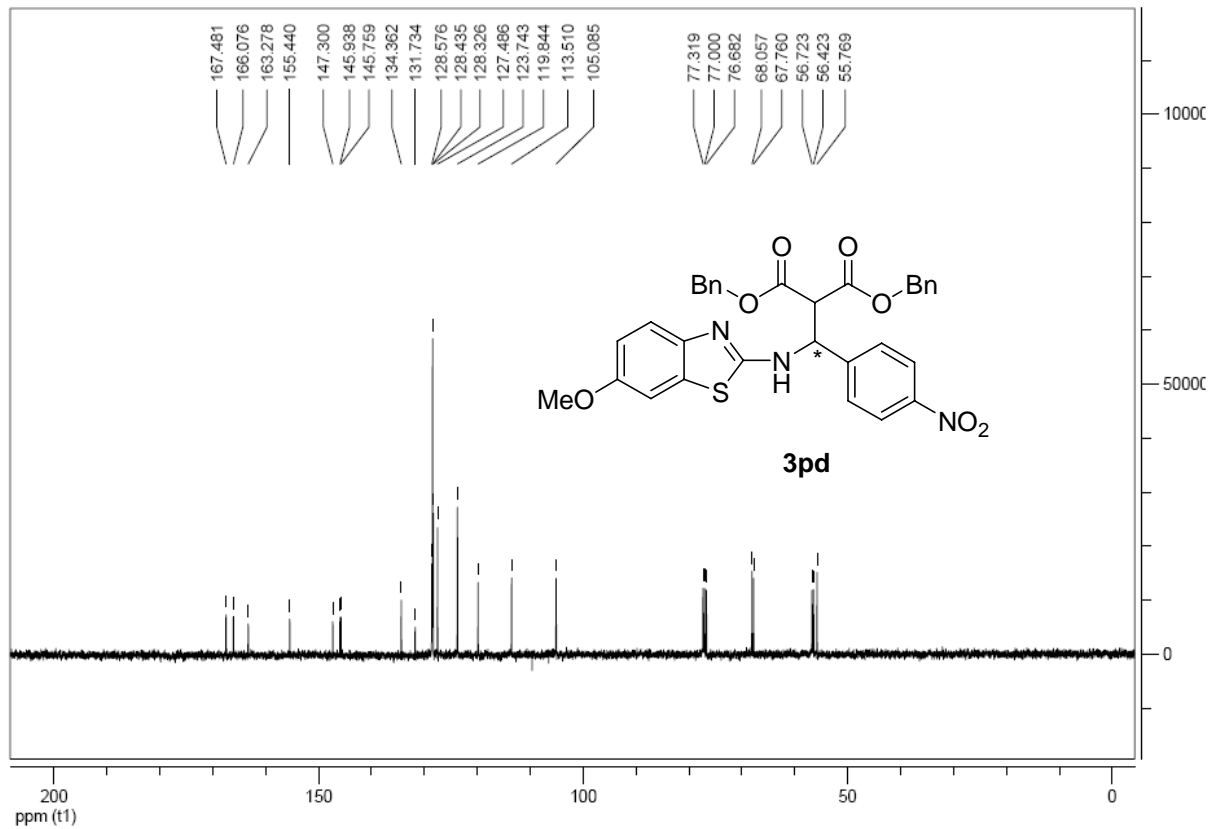

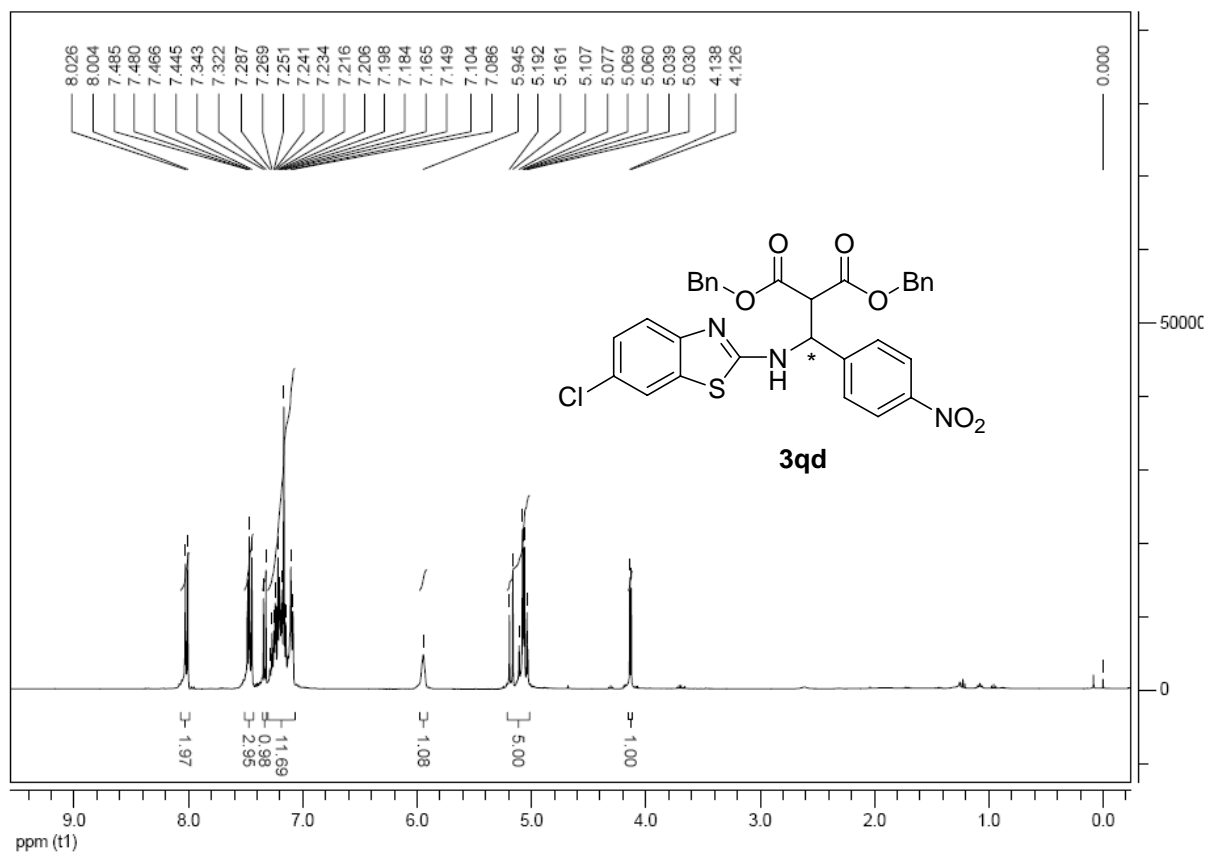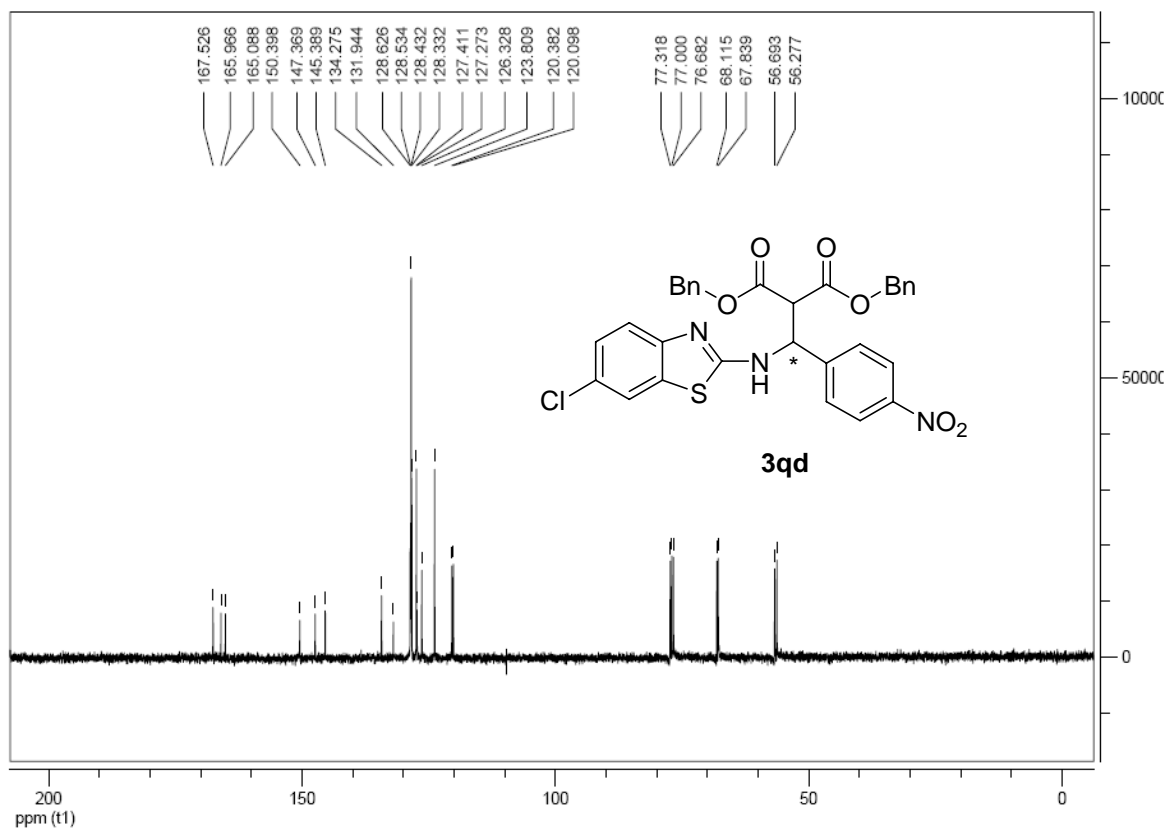

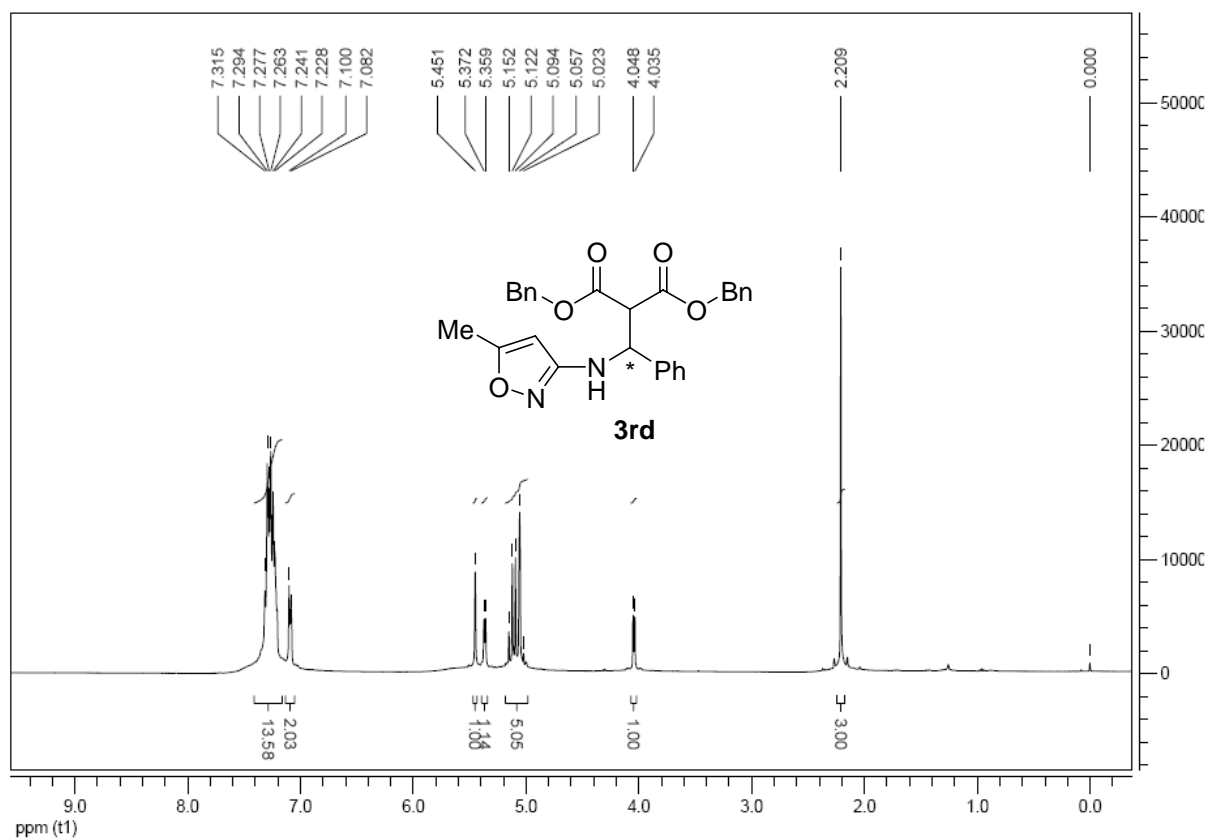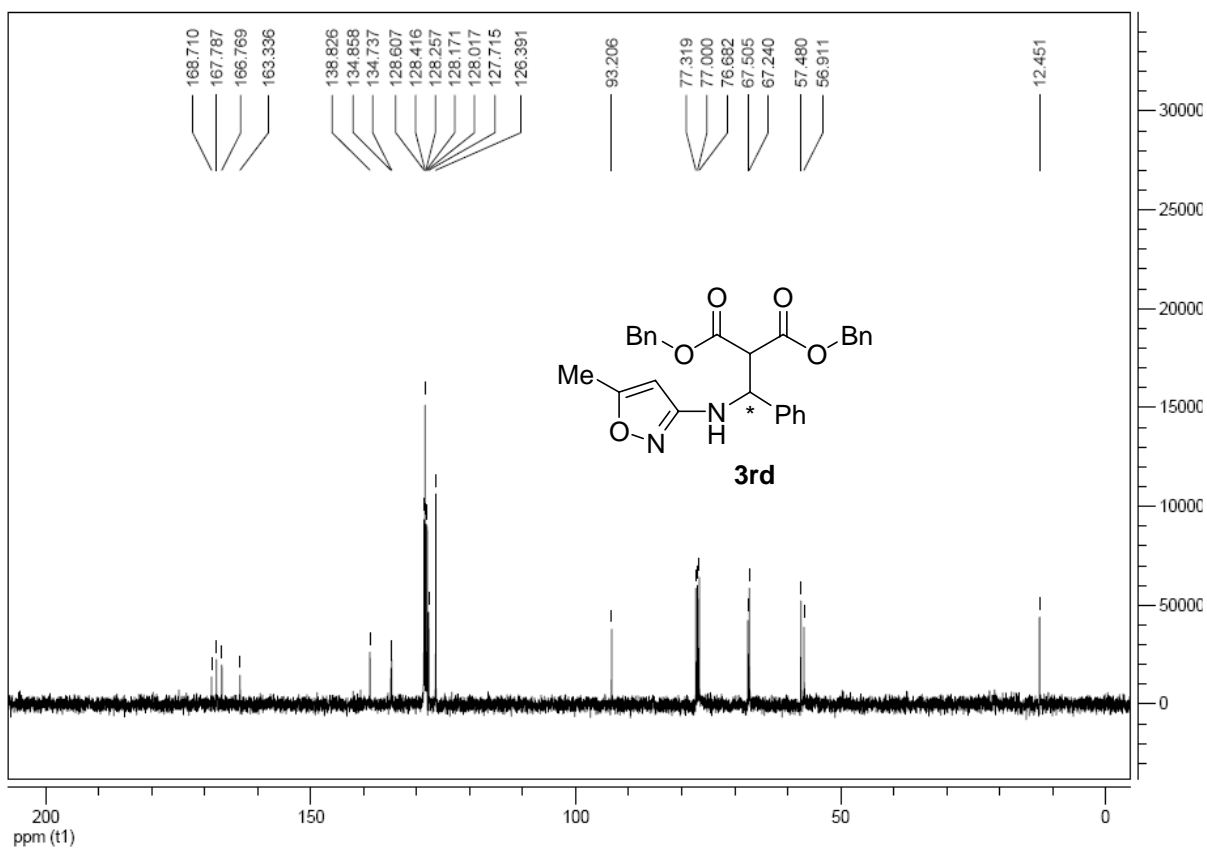



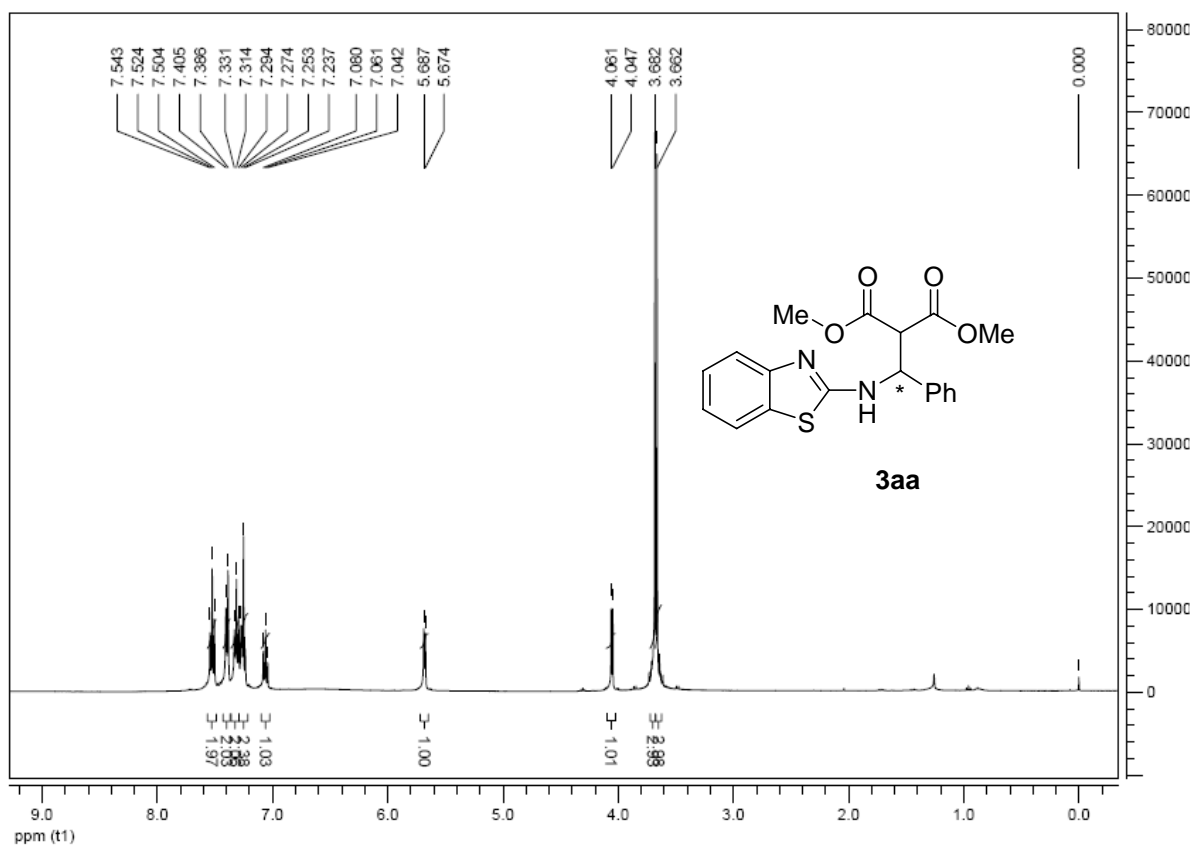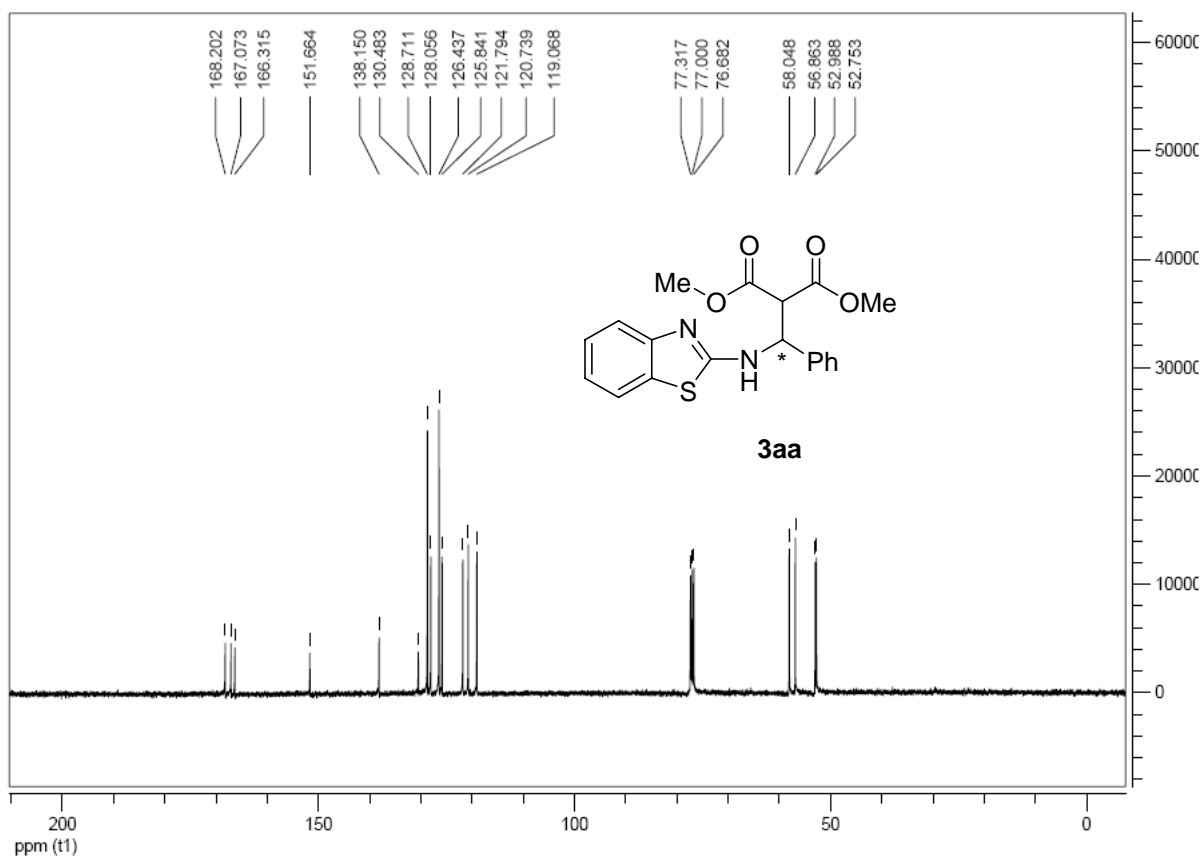

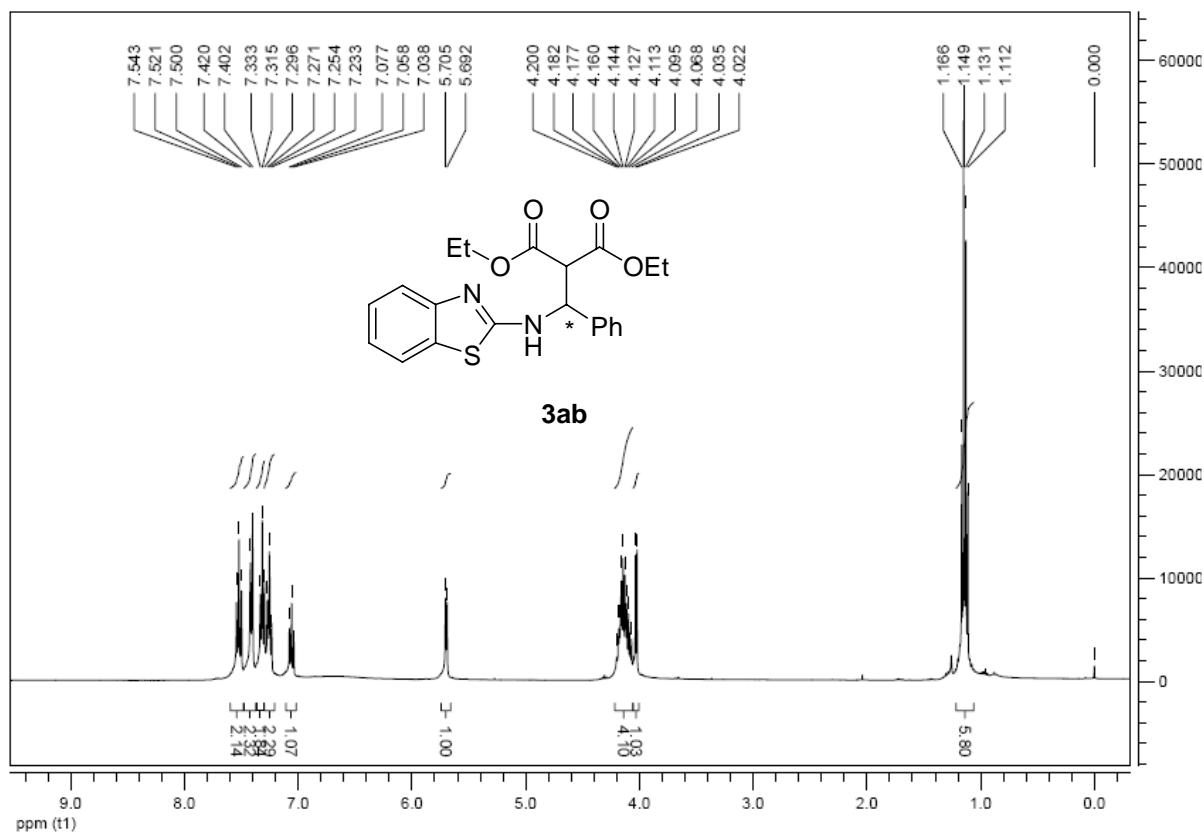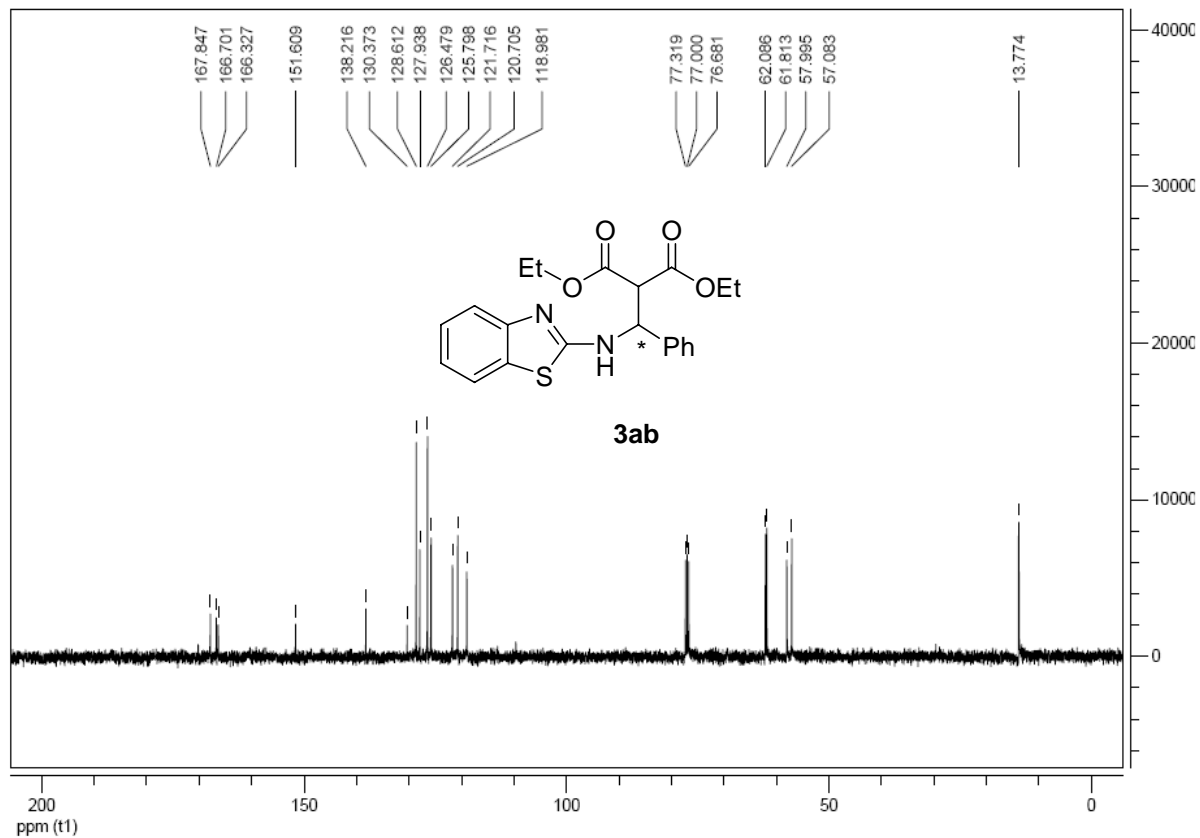

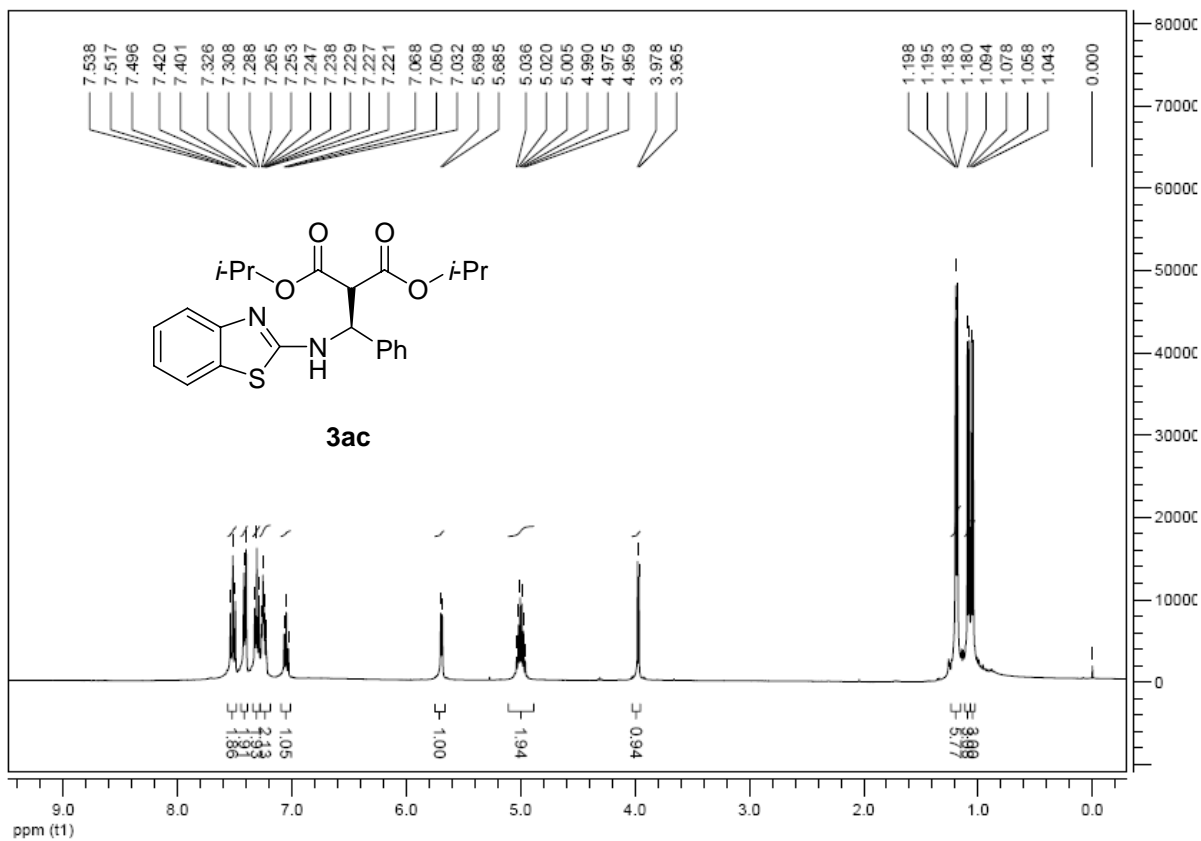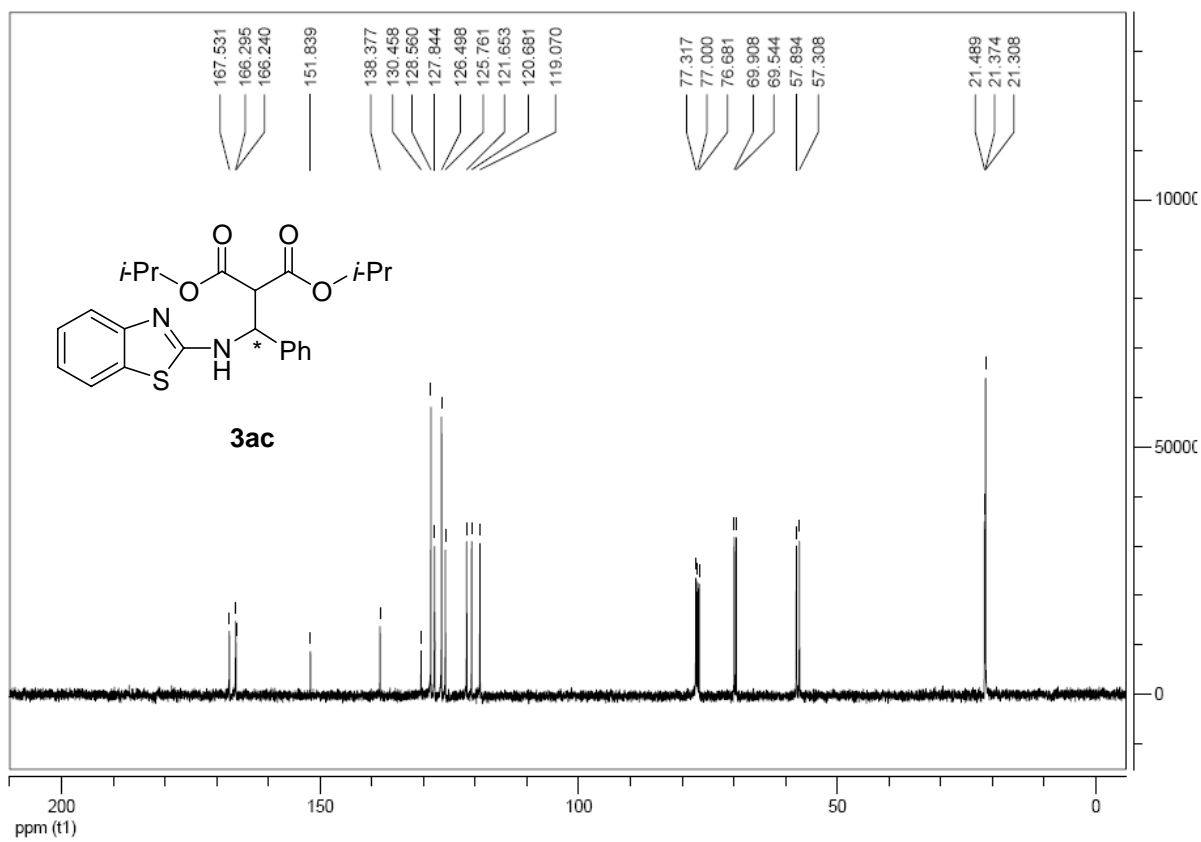



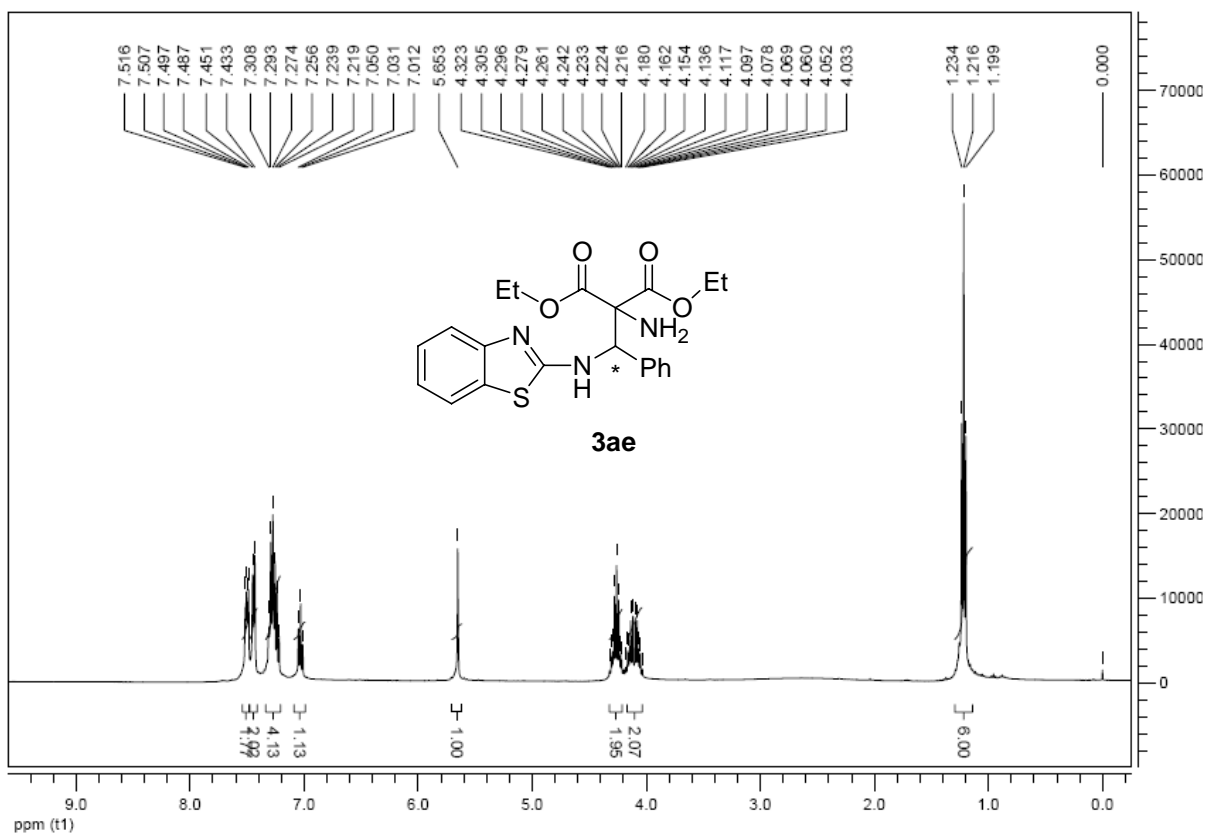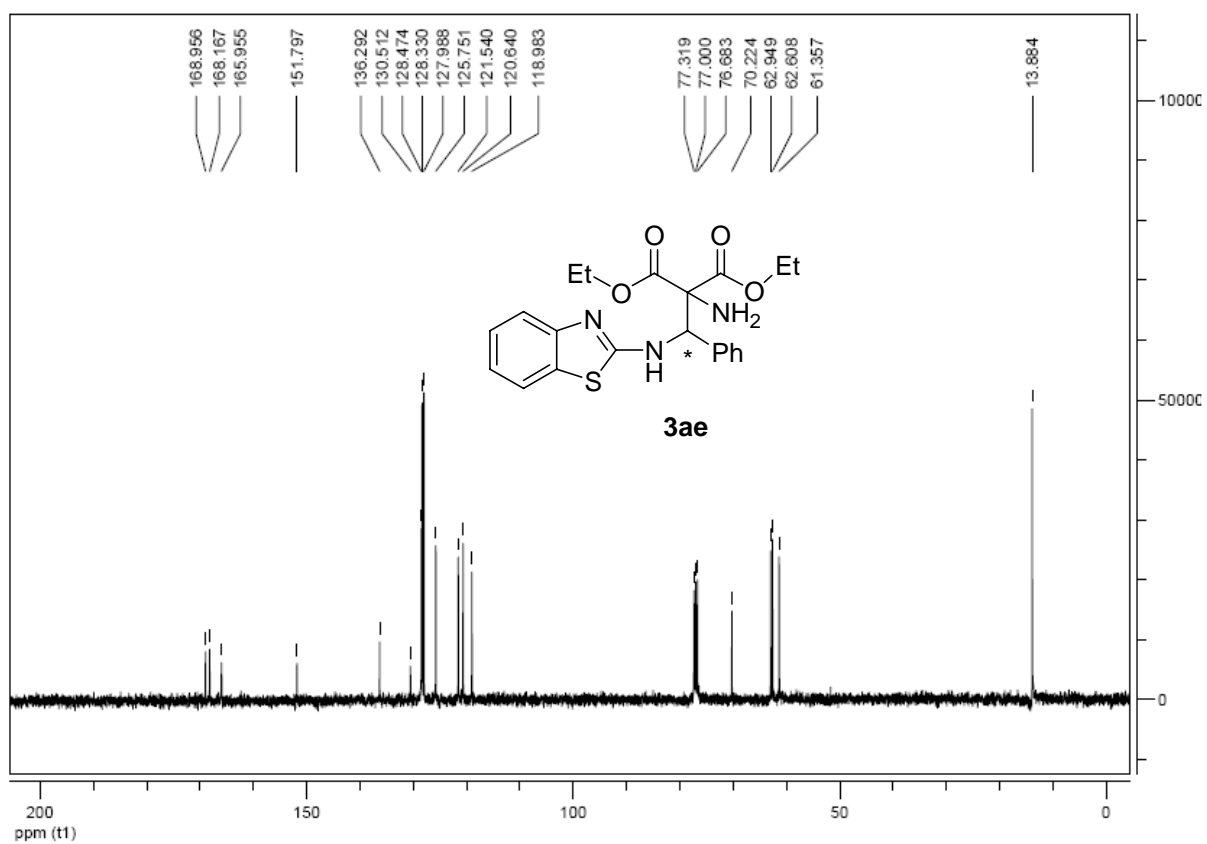

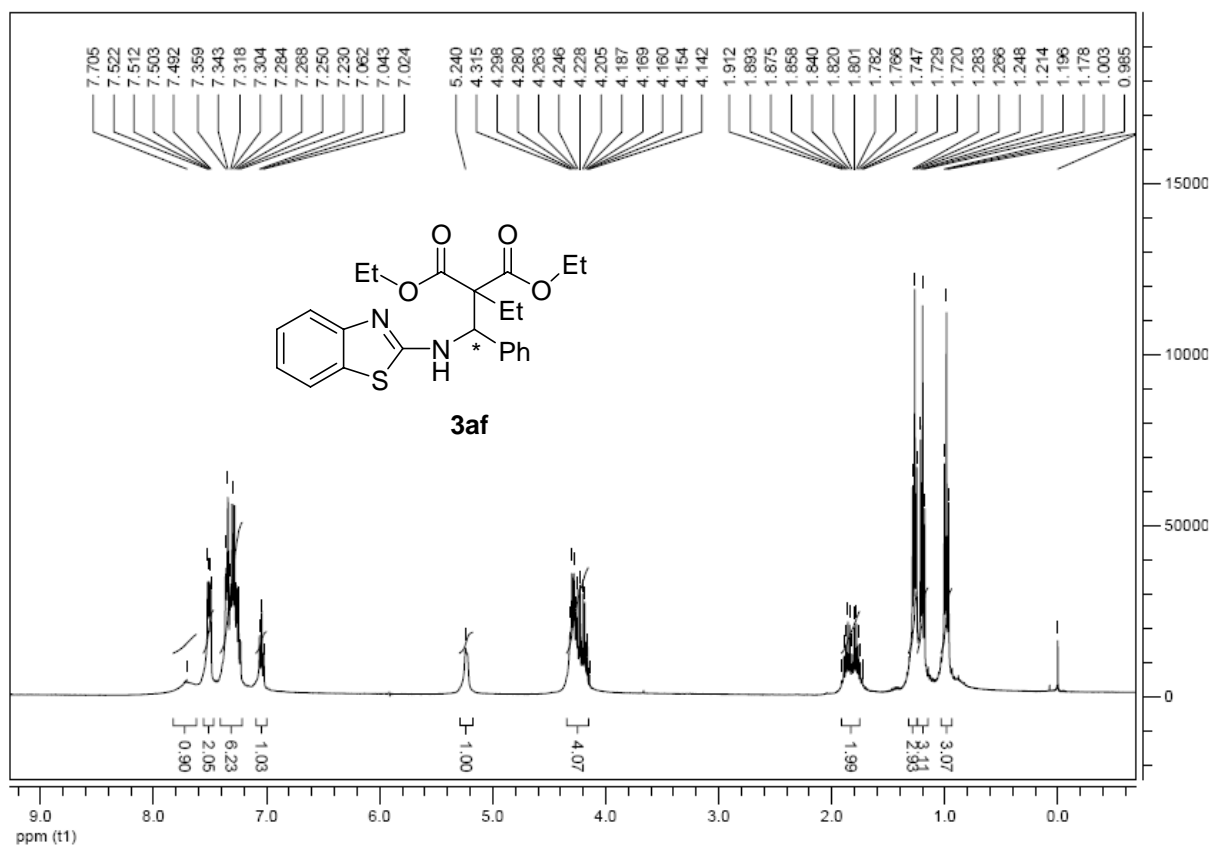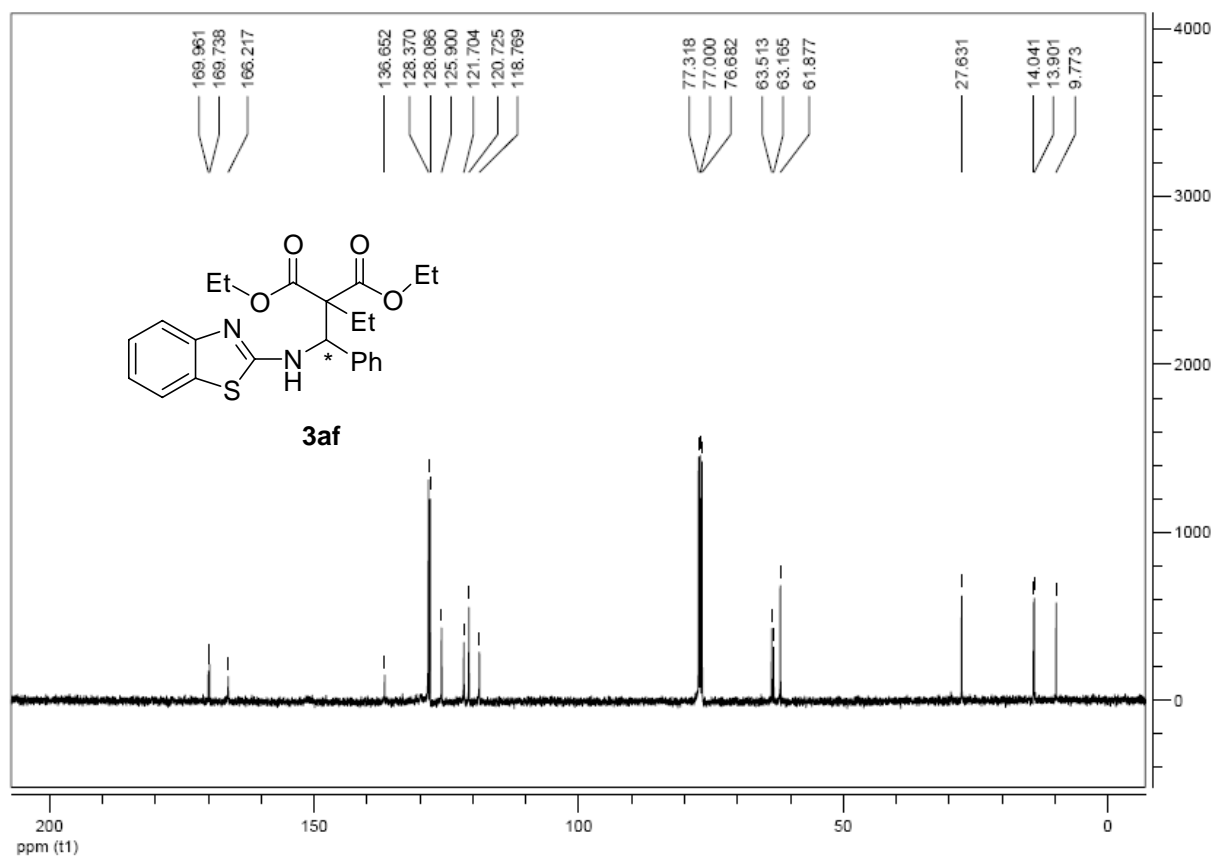

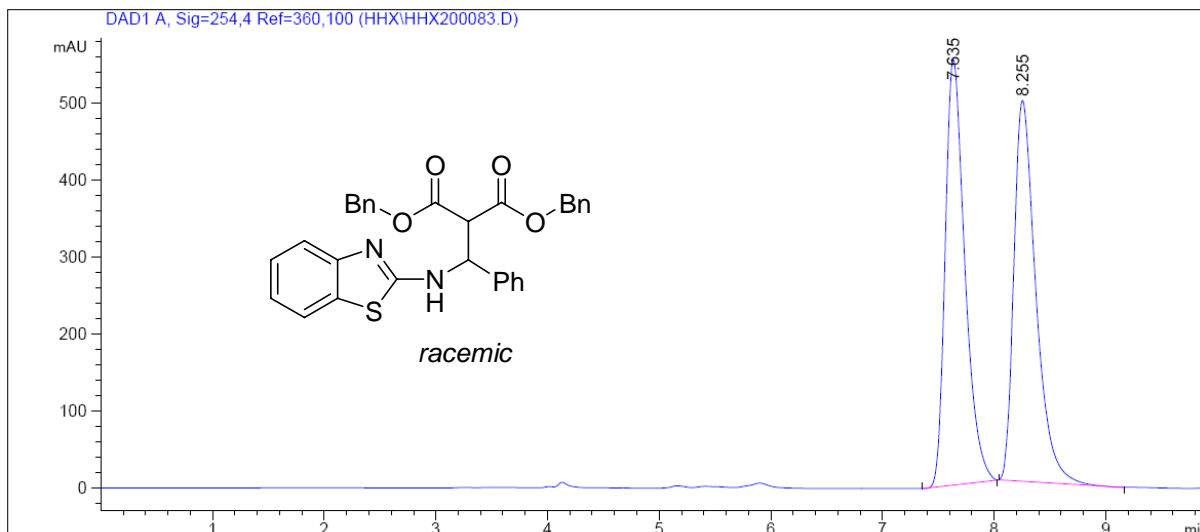

| Peak # | RetTime [min] | Type | Width [min] | Area [mAU*s] | Height [mAU] | Area %  |
|--------|---------------|------|-------------|--------------|--------------|---------|
| 1      | 7.635         | BB S | 0.1862      | 6738.60449   | 552.91821    | 49.9444 |
| 2      | 8.255         | BV   | 0.2074      | 6753.60156   | 494.24542    | 50.0556 |

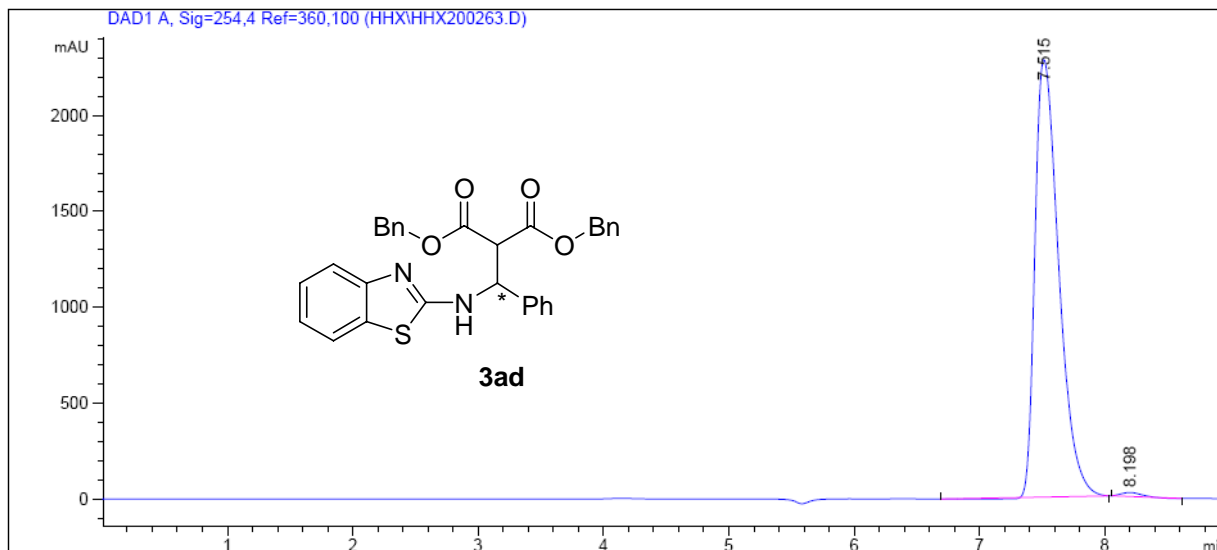

| Peak # | RetTime [min] | Type | Width [min] | Area [mAU*s] | Height [mAU] | Area %  |
|--------|---------------|------|-------------|--------------|--------------|---------|
| 1      | 7.515         | BB S | 0.2013      | 2.99484e4    | 2279.19775   | 99.2651 |
| 2      | 8.198         | BB   | 0.1722      | 221.71843    | 20.83321     | 0.7349  |

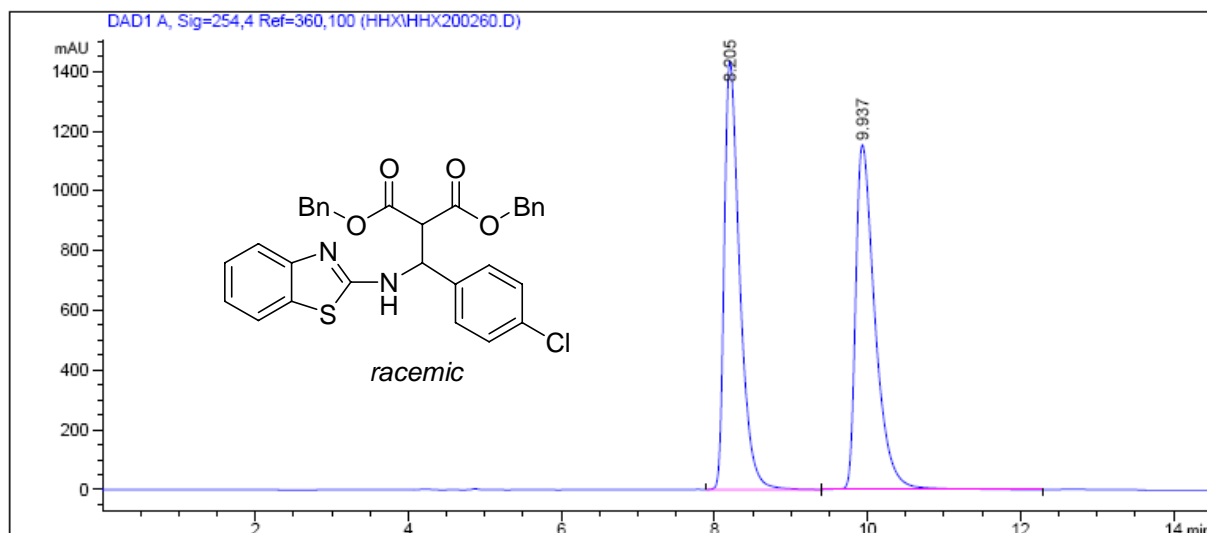

| Peak # | RetTime [min] | Type | Width [min] | Area [mAU*s] | Height [mAU] | Area %  |
|--------|---------------|------|-------------|--------------|--------------|---------|
| 1      | 8.205         | BV   | 0.2116      | 2.01021e4    | 1433.32739   | 49.7311 |
| 2      | 9.937         | VB S | 0.2655      | 2.03195e4    | 1153.31311   | 50.2689 |

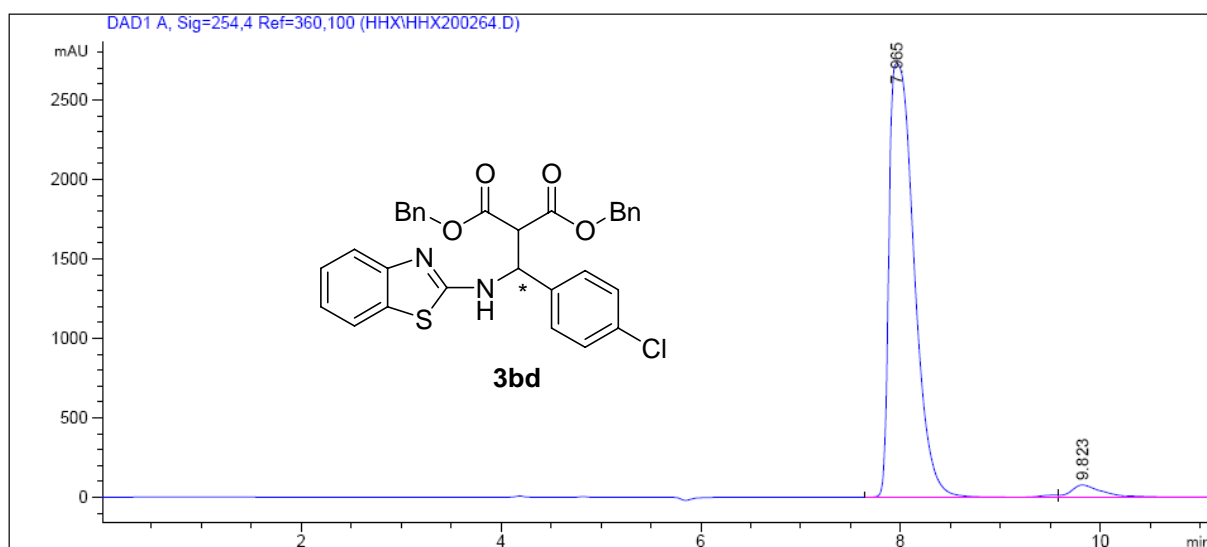

| Peak # | RetTime [min] | Type | Width [min] | Area [mAU*s] | Height [mAU] | Area %  |
|--------|---------------|------|-------------|--------------|--------------|---------|
| 1      | 7.965         | BV S | 0.2706      | 4.74011e4    | 2728.45679   | 96.4102 |
| 2      | 9.823         | VBAS | 0.3199      | 1764.94116   | 78.03716     | 3.5898  |

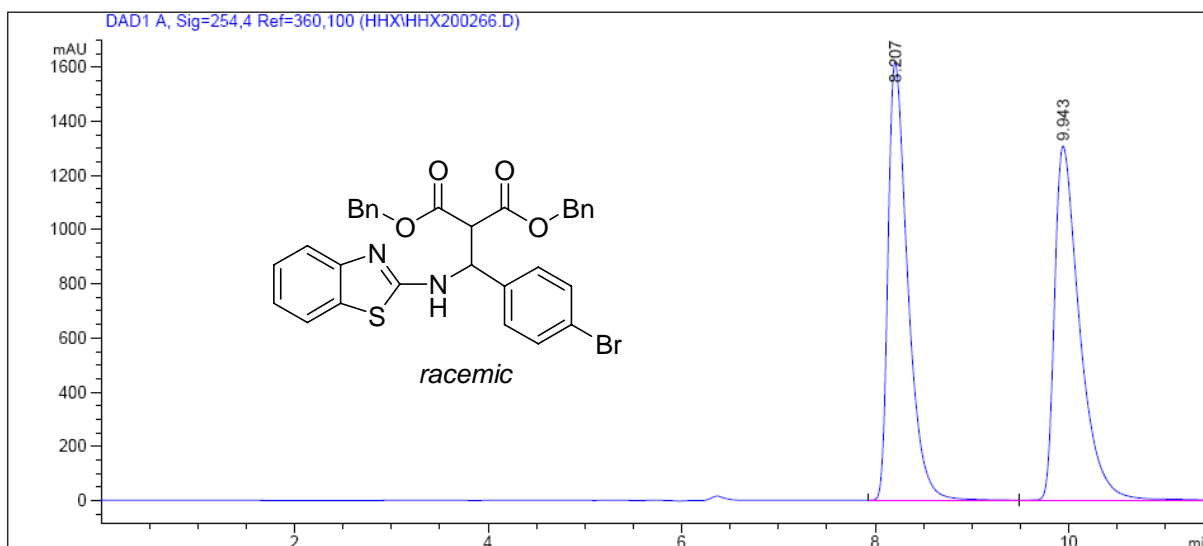

| Peak # | RetTime [min] | Type | Width [min] | Area [mAU*s] | Height [mAU] | Area %  |
|--------|---------------|------|-------------|--------------|--------------|---------|
| 1      | 8.207         | BV S | 0.2129      | 2.28859e4    | 1619.40027   | 49.2205 |
| 2      | 9.943         | VBAS | 0.2705      | 2.36108e4    | 1308.69360   | 50.7795 |

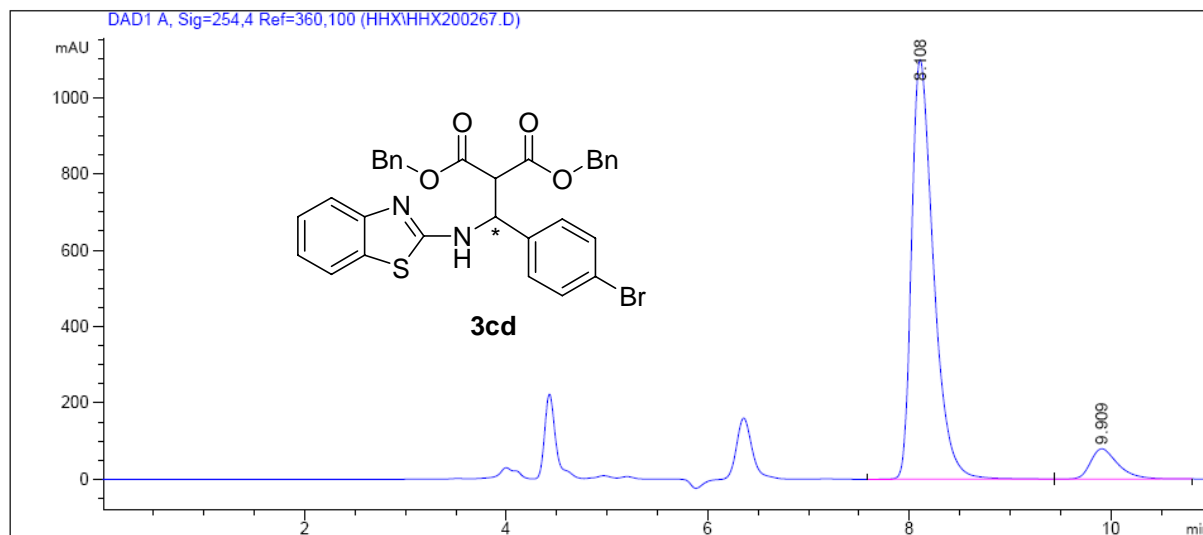

| Peak # | RetTime [min] | Type | Width [min] | Area [mAU*s] | Height [mAU] | Area %  |
|--------|---------------|------|-------------|--------------|--------------|---------|
| 1      | 8.108         | BV S | 0.2283      | 1.65883e4    | 1097.63232   | 91.7161 |
| 2      | 9.909         | VB S | 0.2847      | 1498.28430   | 79.19464     | 8.2839  |

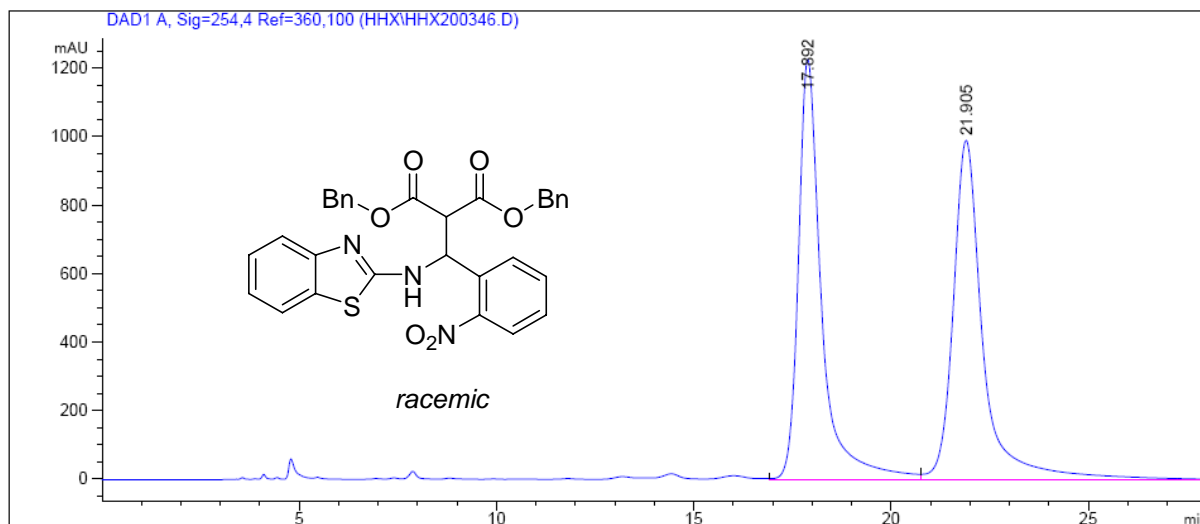

| Peak # | RetTime [min] | Type | Width [min] | Area [mAU*s] | Height [mAU] | Area %  |
|--------|---------------|------|-------------|--------------|--------------|---------|
| 1      | 17.892        | VV   | 0.6014      | 5.01679e4    | 1226.09375   | 49.0985 |
| 2      | 21.905        | VBA  | 0.7726      | 5.20101e4    | 990.44806    | 50.9015 |

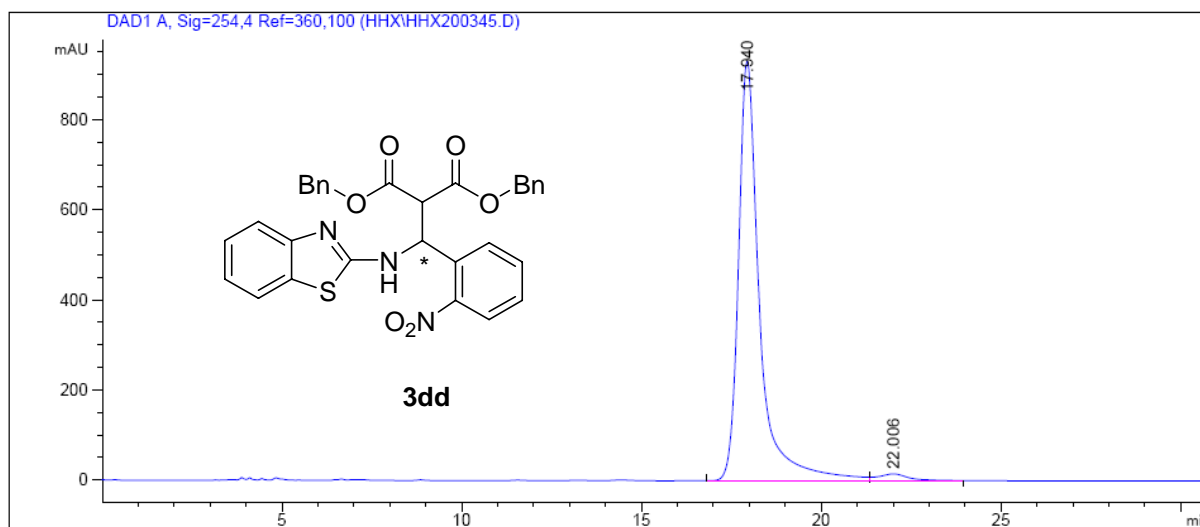

| Peak # | RetTime [min] | Type | Width [min] | Area [mAU*s] | Height [mAU] | Area %  |
|--------|---------------|------|-------------|--------------|--------------|---------|
| 1      | 17.940        | VV   | 0.6053      | 3.81349e4    | 932.12201    | 97.6872 |
| 2      | 22.006        | VB   | 0.8522      | 902.84485    | 15.12914     | 2.3128  |

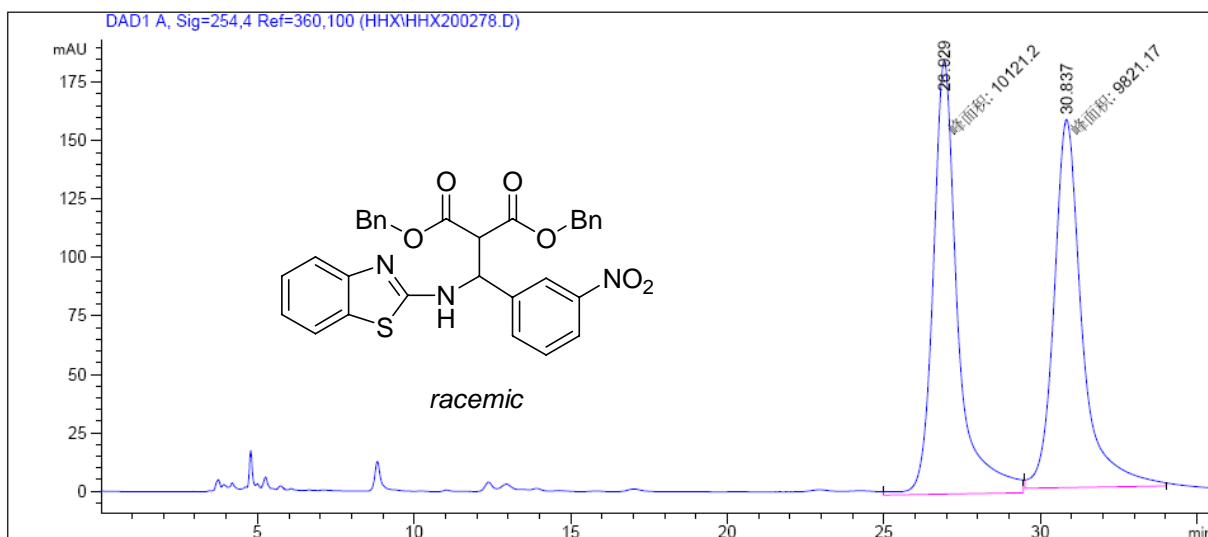

| Peak # | RetTime [min] | Type | Width [min] | Area [mAU*s] | Height [mAU] | Area %  |
|--------|---------------|------|-------------|--------------|--------------|---------|
| 1      | 26.929        | MM   | 0.9109      | 1.01212e4    | 185.18739    | 50.7521 |
| 2      | 30.837        | MM   | 1.0386      | 9821.16895   | 157.61003    | 49.2479 |

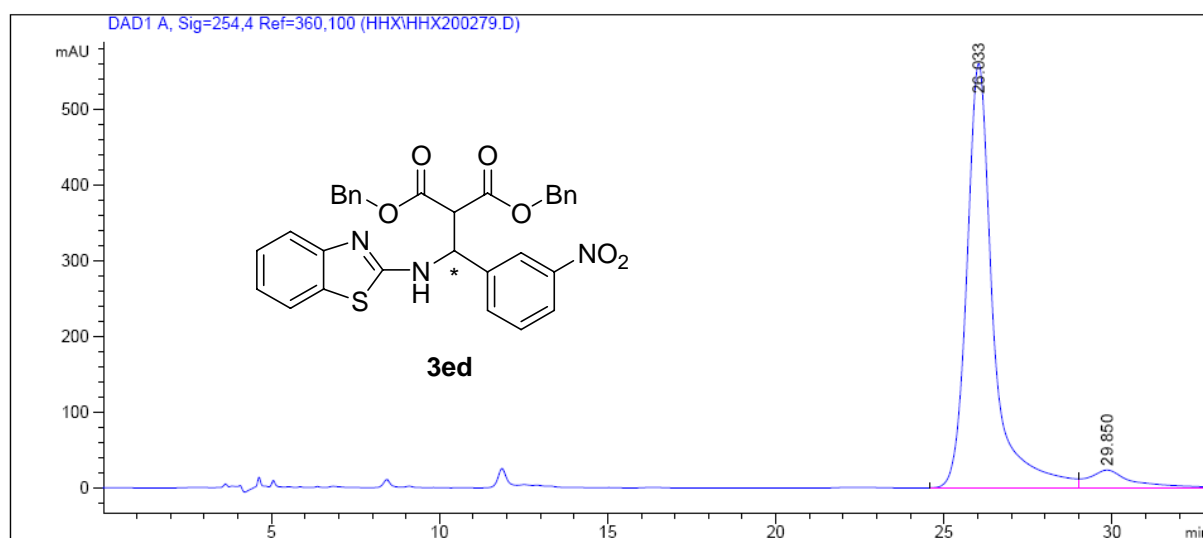

| Peak # | RetTime [min] | Type | Width [min] | Area [mAU*s] | Height [mAU] | Area %  |
|--------|---------------|------|-------------|--------------|--------------|---------|
| 1      | 26.033        | BV   | 0.8009      | 3.04585e4    | 561.42432    | 93.4456 |
| 2      | 29.850        | VBA  | 1.2424      | 2136.40576   | 23.63957     | 6.5544  |

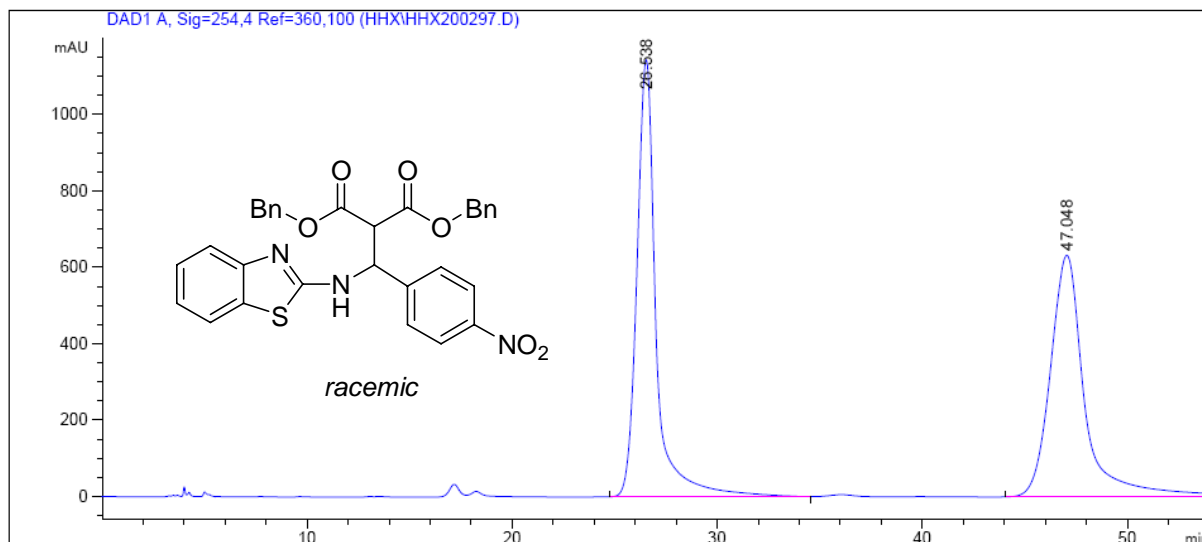

| Peak # | RetTime [min] | Type | Width [min] | Area [mAU*s] | Height [mAU] | Area %  |
|--------|---------------|------|-------------|--------------|--------------|---------|
| 1      | 26.538        | BB   | 0.9783      | 7.47379e4    | 1143.77820   | 50.4495 |
| 2      | 47.048        | BBA  | 1.7264      | 7.34061e4    | 632.32666    | 49.5505 |

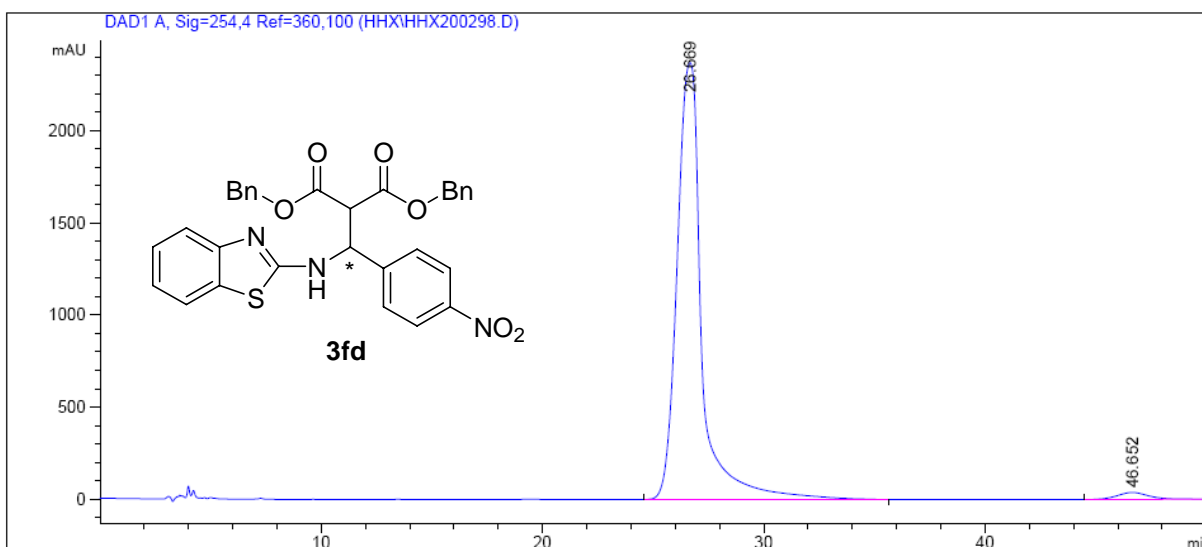

| Peak # | RetTime [min] | Type | Width [min] | Area [mAU*s] | Height [mAU] | Area %  |
|--------|---------------|------|-------------|--------------|--------------|---------|
| 1      | 26.669        | BB   | 1.1767      | 1.83789e5    | 2370.08423   | 97.9838 |
| 2      | 46.652        | BB   | 1.5382      | 3781.86597   | 37.32044     | 2.0162  |



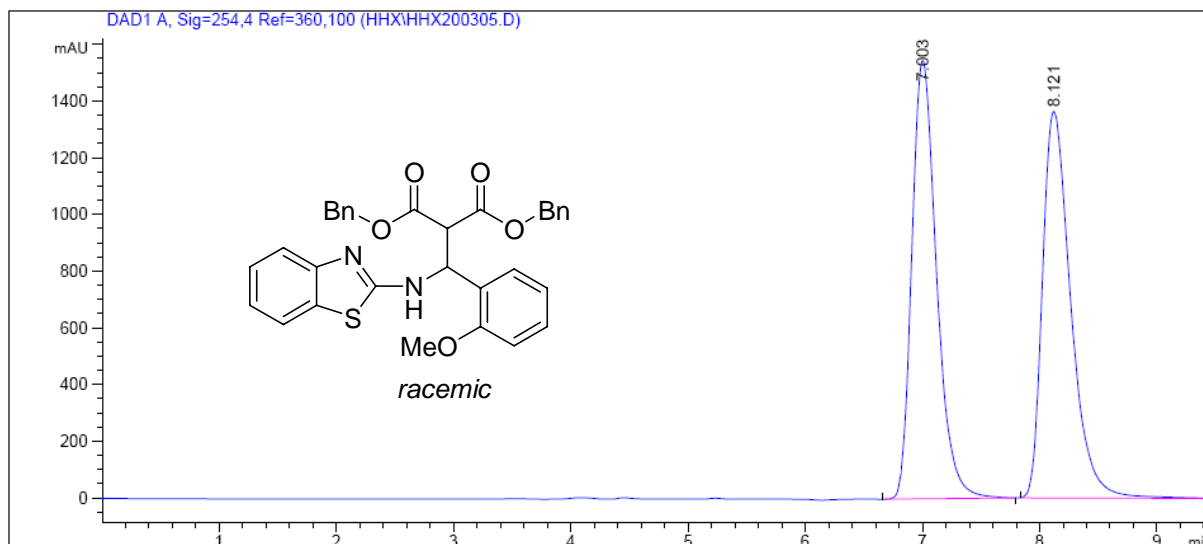

| Peak # | RetTime [min] | Type | Width [min] | Area [mAU*s] | Height [mAU] | Area %  |
|--------|---------------|------|-------------|--------------|--------------|---------|
| 1      | 7.003         | BB S | 0.2266      | 2.25839e4    | 1544.16003   | 49.7135 |
| 2      | 8.121         | BBA  | 0.2556      | 2.28442e4    | 1362.29297   | 50.2865 |

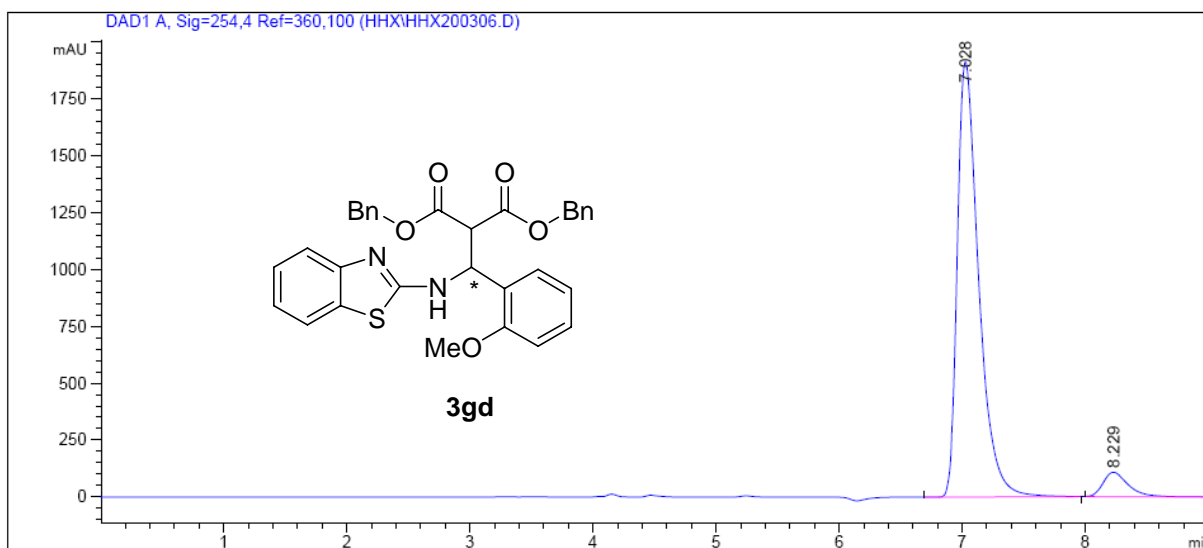

| Peak # | RetTime [min] | Type | Width [min] | Area [mAU*s] | Height [mAU] | Area %  |
|--------|---------------|------|-------------|--------------|--------------|---------|
| 1      | 7.028         | BB S | 0.1851      | 2.30929e4    | 1909.28894   | 93.8110 |
| 2      | 8.229         | BBA  | 0.2138      | 1523.52344   | 107.18489    | 6.1890  |

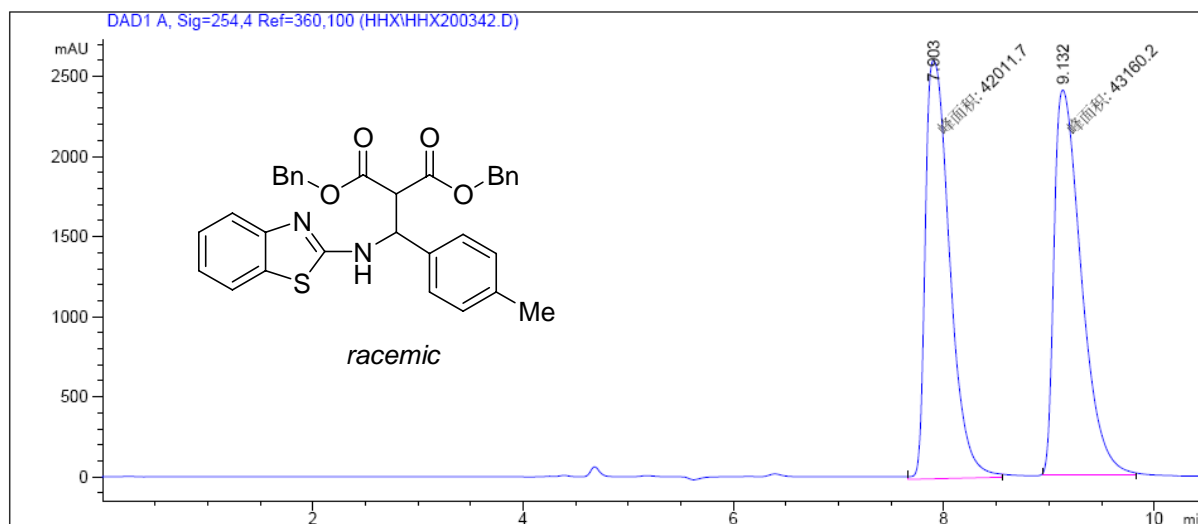

| Peak # | RetTime [min] | Type | Width [min] | Area [mAU*s] | Height [mAU] | Area %  |
|--------|---------------|------|-------------|--------------|--------------|---------|
| 1      | 7.903         | MM   | 0.2679      | 4.20117e4    | 2613.58667   | 49.3257 |
| 2      | 9.132         | MM   | 0.2990      | 4.31602e4    | 2405.57715   | 50.6743 |

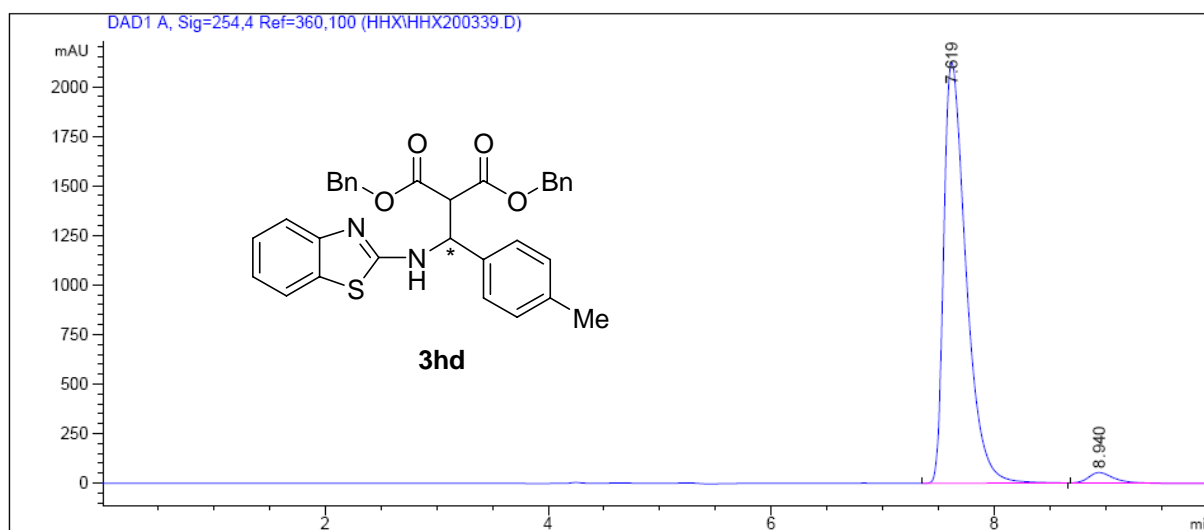

| Peak # | RetTime [min] | Type | Width [min] | Area [mAU*s] | Height [mAU] | Area %  |
|--------|---------------|------|-------------|--------------|--------------|---------|
| 1      | 7.619         | BB S | 0.2098      | 2.94204e4    | 2120.82056   | 97.2944 |
| 2      | 8.940         | BBAS | 0.2370      | 818.14935    | 52.74548     | 2.7056  |

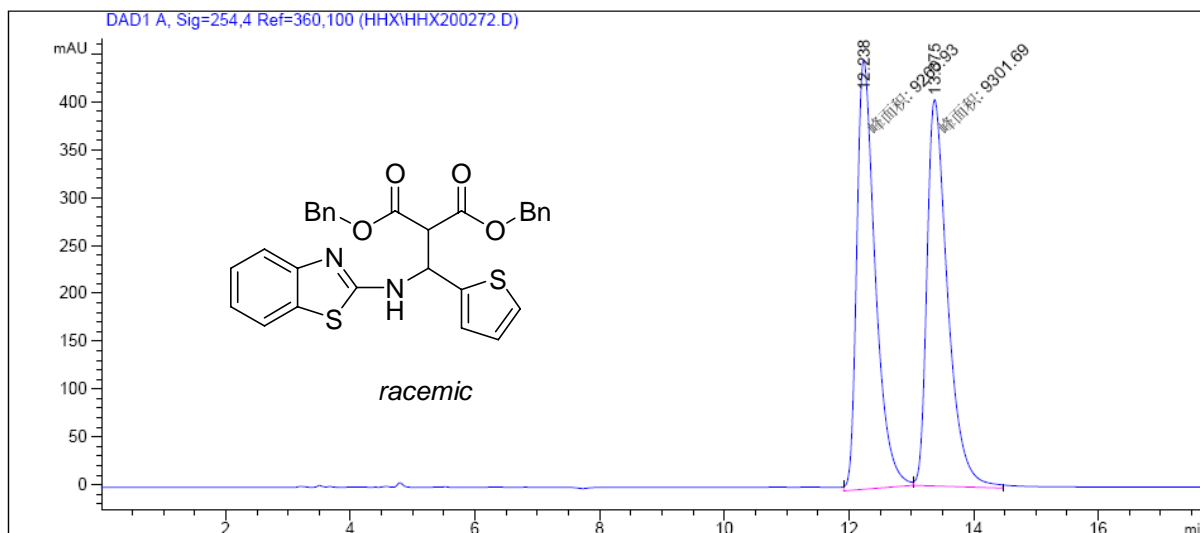

| Peak # | RetTime [min] | Type | Width [min] | Area [mAU*s] | Height [mAU] | Area %  |
|--------|---------------|------|-------------|--------------|--------------|---------|
| 1      | 12.238        | MM   | 0.3441      | 9260.92871   | 448.59100    | 49.8902 |
| 2      | 13.375        | MM   | 0.3839      | 9301.68848   | 403.87192    | 50.1098 |

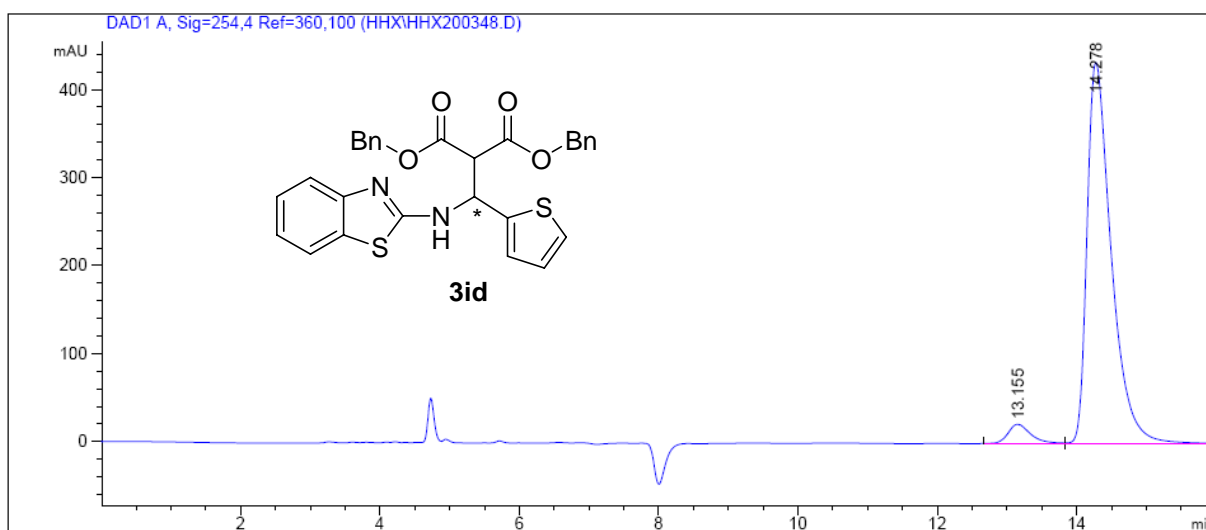

| Peak # | RetTime [min] | Type | Width [min] | Area [mAU*s] | Height [mAU] | Area %  |
|--------|---------------|------|-------------|--------------|--------------|---------|
| 1      | 13.155        | BV   | 0.3398      | 494.81833    | 21.88069     | 4.5213  |
| 2      | 14.278        | VBA  | 0.3618      | 1.04493e4    | 432.58932    | 95.4787 |

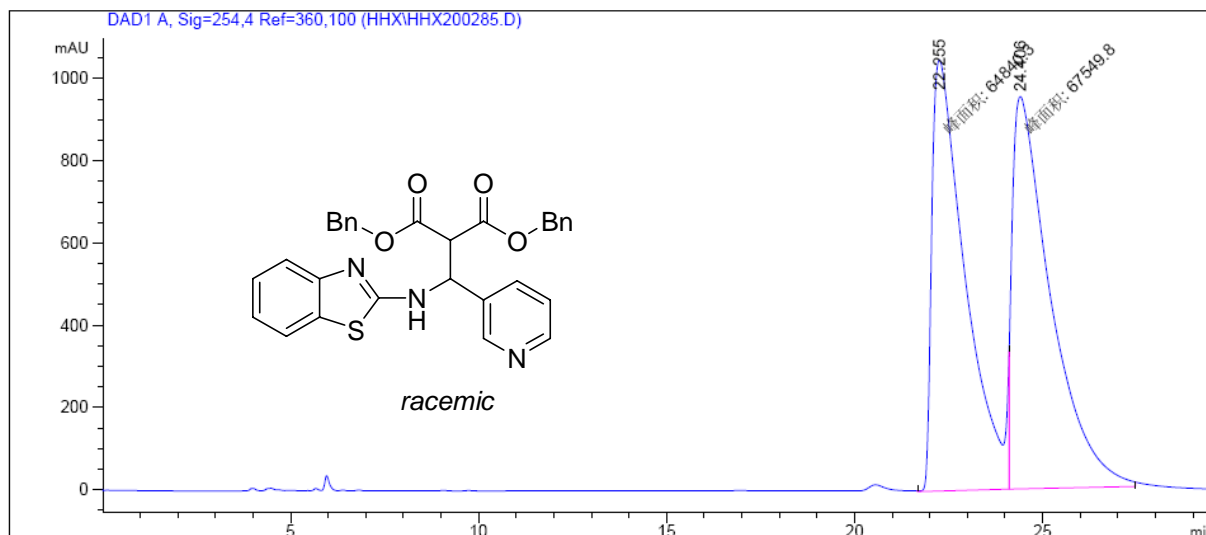

| Peak # | RetTime [min] | Type | Width [min] | Area [mAU*s] | Height [mAU] | Area %  |
|--------|---------------|------|-------------|--------------|--------------|---------|
| 1      | 22.255        | MM   | 1.0299      | 6.48403e4    | 1049.31458   | 48.9767 |
| 2      | 24.406        | MM   | 1.1788      | 6.75498e4    | 955.03412    | 51.0233 |

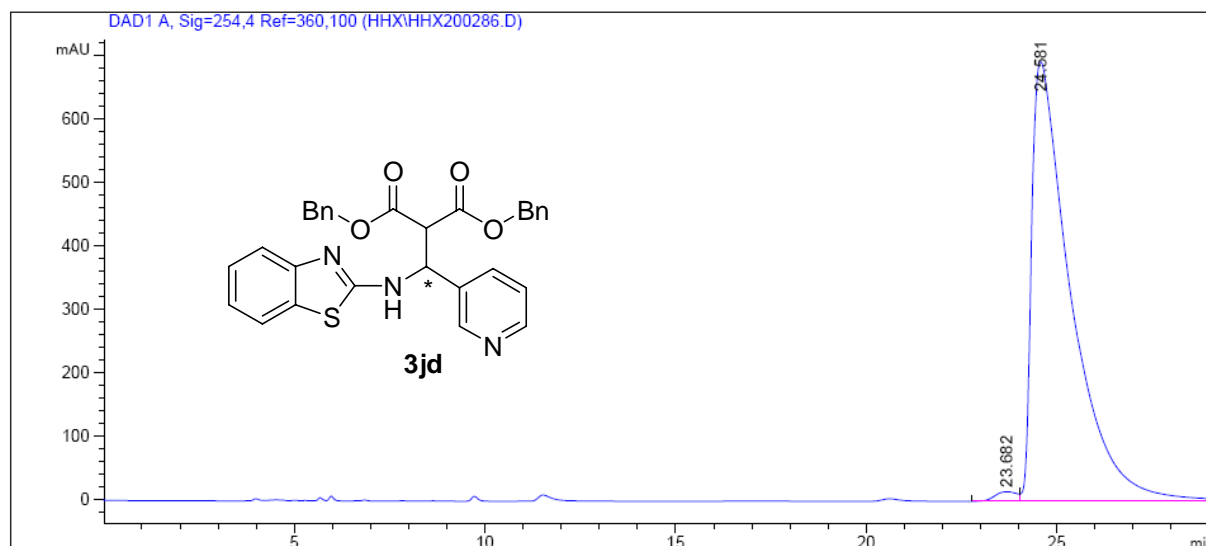

| Peak # | RetTime [min] | Type | Width [min] | Area [mAU*s] | Height [mAU] | Area %  |
|--------|---------------|------|-------------|--------------|--------------|---------|
| 1      | 23.682        | BV   | 0.6150      | 580.08972    | 15.00644     | 1.1607  |
| 2      | 24.581        | VBA  | 1.0285      | 4.93961e4    | 692.27606    | 98.8393 |

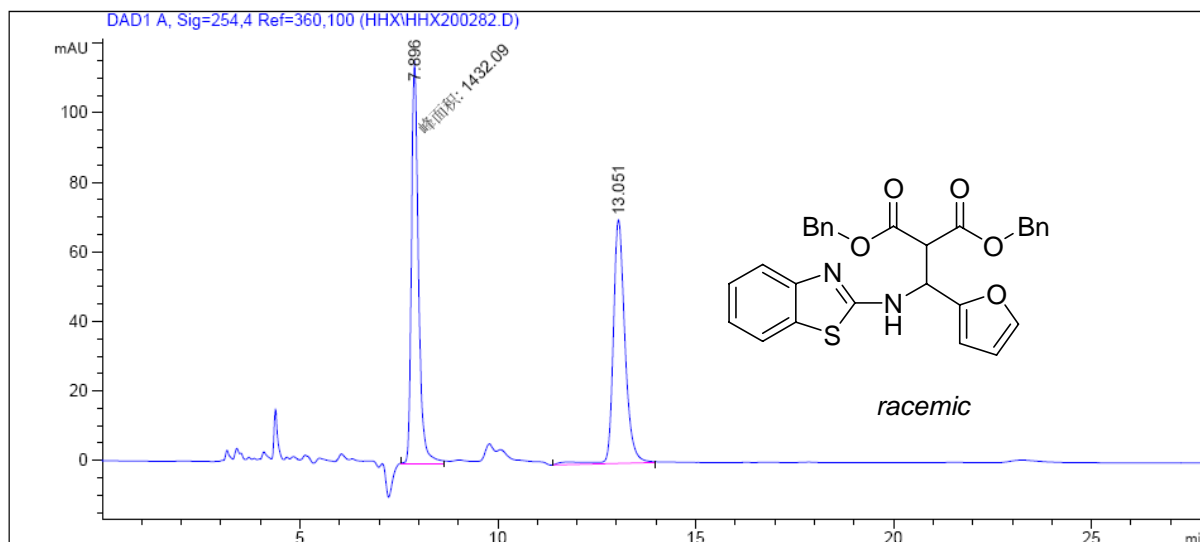

| Peak # | RetTime [min] | Type | Width [min] | Area [mAU*s] | Height [mAU] | Area %  |
|--------|---------------|------|-------------|--------------|--------------|---------|
| 1      | 7.896         | MM   | 0.2057      | 1432.09473   | 116.05473    | 49.6613 |
| 2      | 13.051        | BB   | 0.3136      | 1451.62988   | 70.08478     | 50.3387 |

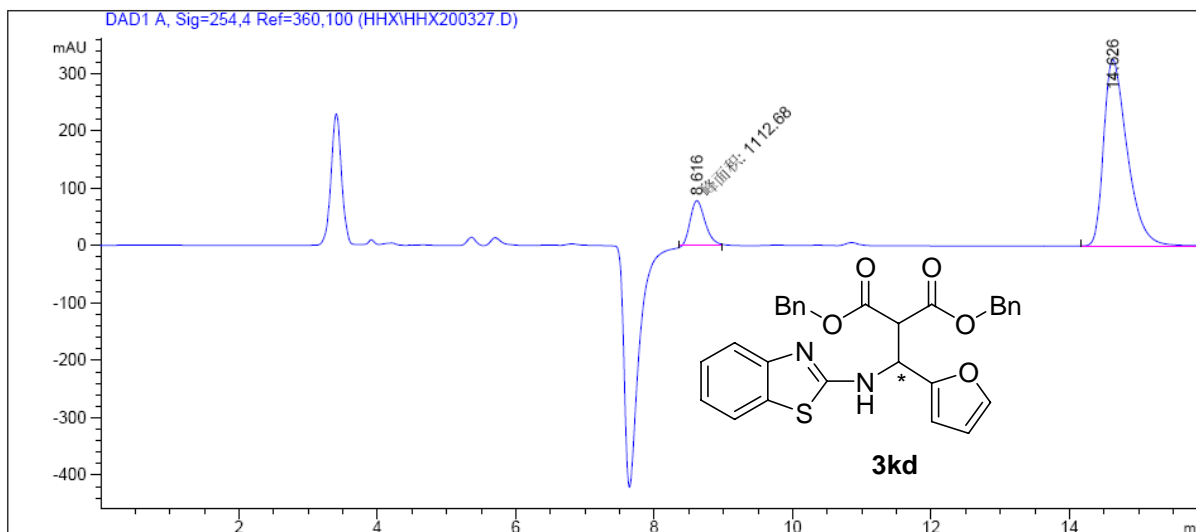

| Peak # | RetTime [min] | Type | Width [min] | Area [mAU*s] | Height [mAU] | Area %  |
|--------|---------------|------|-------------|--------------|--------------|---------|
| 1      | 8.616         | MM   | 0.2417      | 1112.68188   | 76.74071     | 12.6514 |
| 2      | 14.626        | BBA  | 0.3598      | 7682.27783   | 325.01221    | 87.3486 |

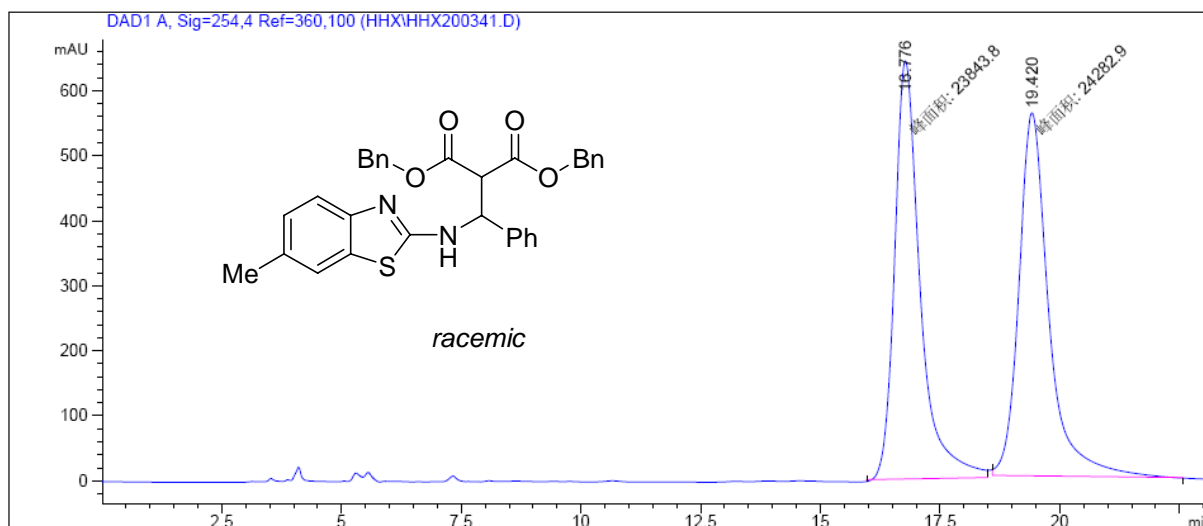

| Peak # | RetTime [min] | Type | Width [min] | Area [mAU*s] | Height [mAU] | Area %  |
|--------|---------------|------|-------------|--------------|--------------|---------|
| 1      | 16.776        | MM   | 0.6177      | 2.38438e4    | 643.31512    | 49.5439 |
| 2      | 19.420        | MM   | 0.7247      | 2.42829e4    | 558.42529    | 50.4561 |

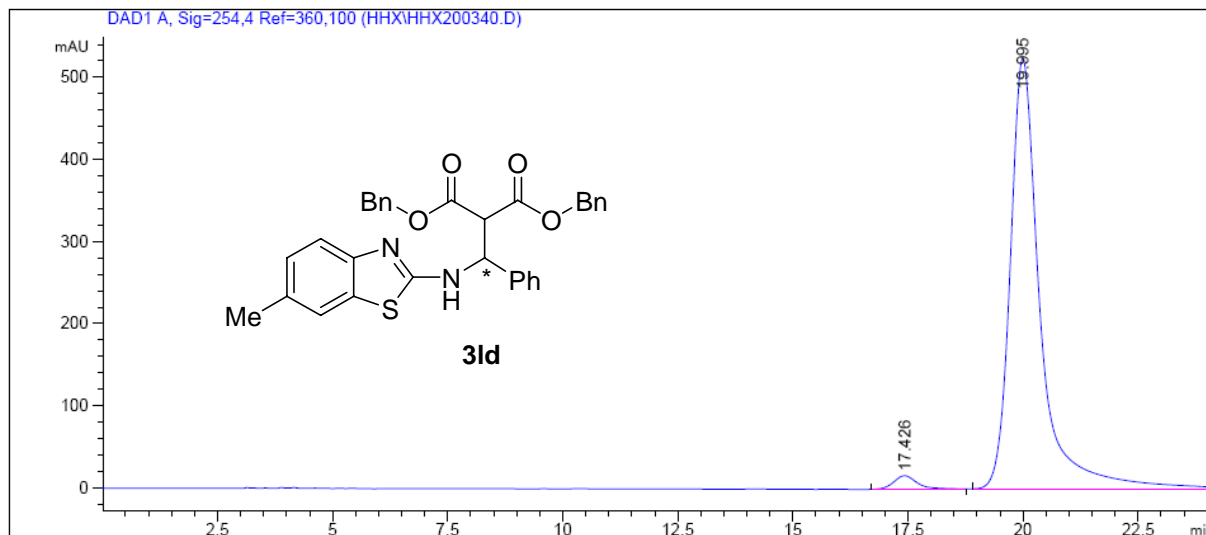

| Peak # | RetTime [min] | Type | Width [min] | Area [mAU*s] | Height [mAU] | Area %  |
|--------|---------------|------|-------------|--------------|--------------|---------|
| 1      | 17.426        | BB   | 0.5557      | 618.21655    | 16.70709     | 2.5093  |
| 2      | 19.995        | BBA  | 0.6740      | 2.40192e4    | 524.77472    | 97.4907 |

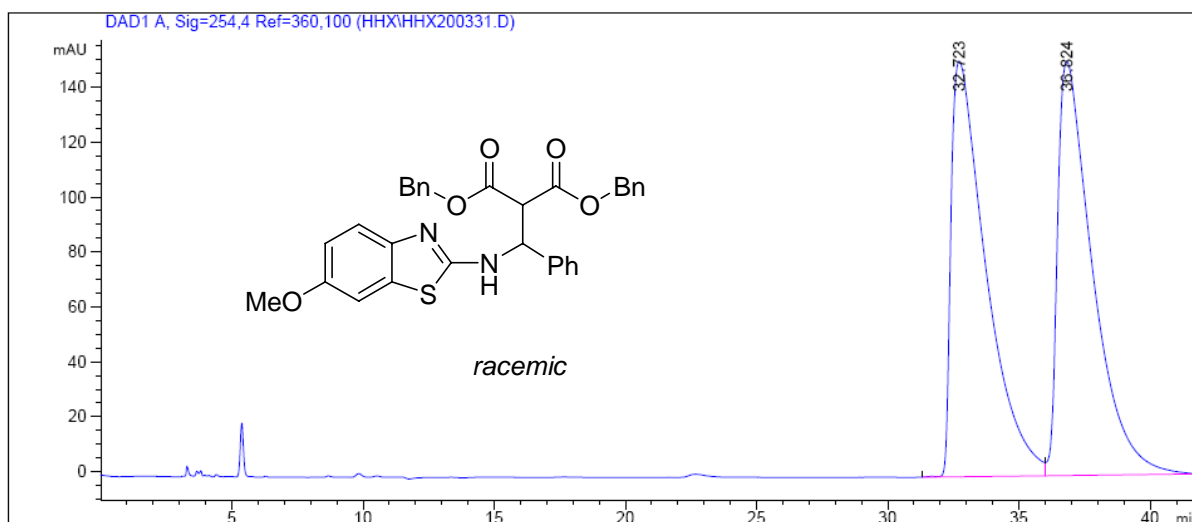

| Peak # | RetTime [min] | Type | Width [min] | Area [mAU*s] | Height [mAU] | Area %  |
|--------|---------------|------|-------------|--------------|--------------|---------|
| 1      | 32.723        | BV   | 1.3235      | 1.39566e4    | 151.39223    | 49.9356 |
| 2      | 36.824        | VB   | 1.3231      | 1.39926e4    | 150.72505    | 50.0644 |

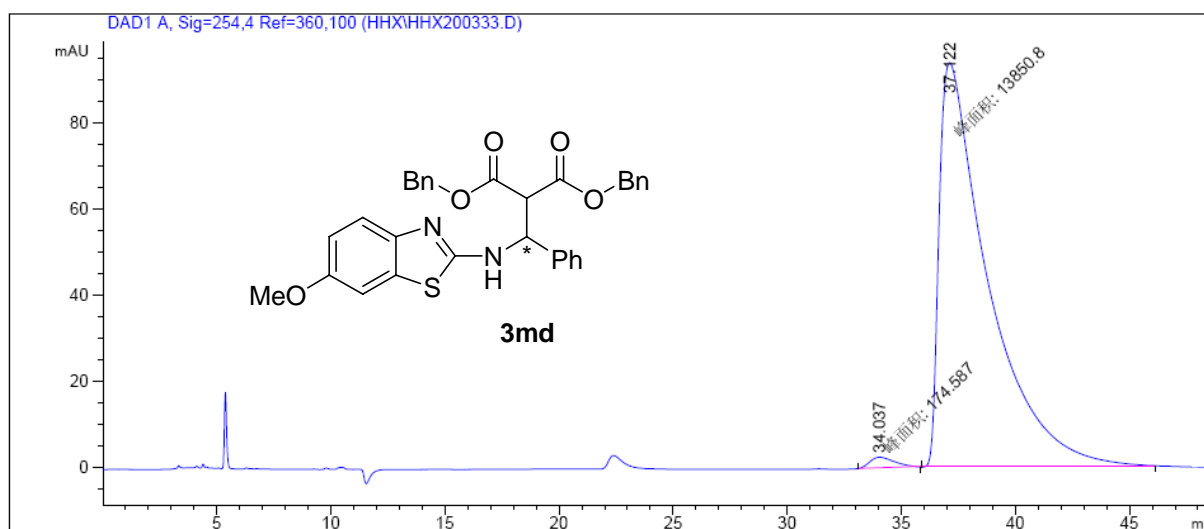

| Peak # | RetTime [min] | Type | Width [min] | Area [mAU*s] | Height [mAU] | Area %  |
|--------|---------------|------|-------------|--------------|--------------|---------|
| 1      | 34.037        | MM   | 1.2043      | 174.58746    | 2.41617      | 1.2448  |
| 2      | 37.122        | MM   | 2.4625      | 1.38508e4    | 93.74534     | 98.7552 |

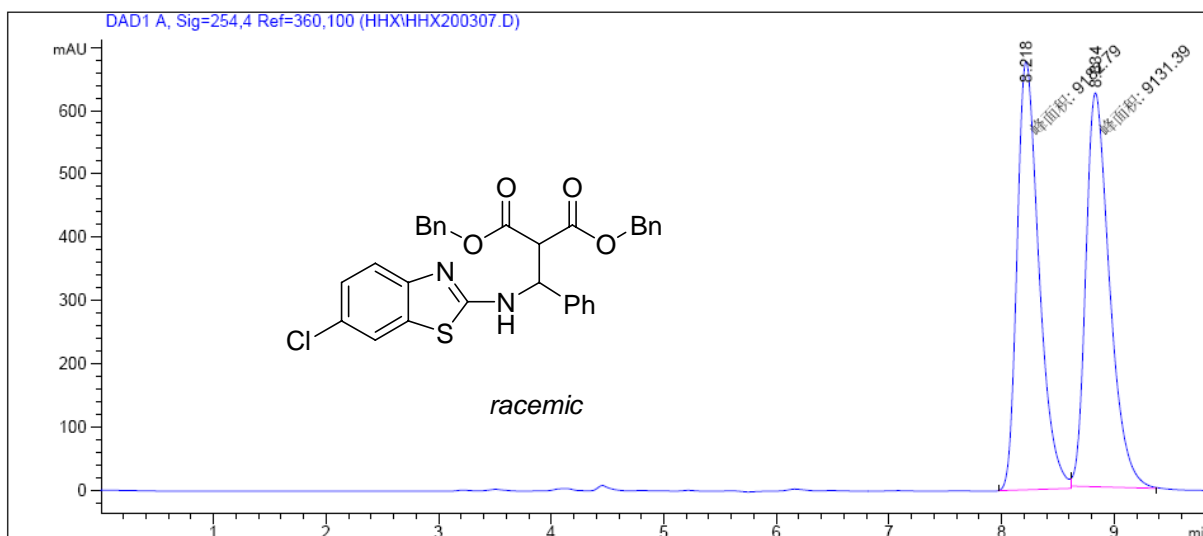

| Peak # | RetTime [min] | Type | Width [min] | Area [mAU*s] | Height [mAU] | Area %  |
|--------|---------------|------|-------------|--------------|--------------|---------|
| 1      | 8.218         | MM   | 0.2256      | 9182.78906   | 678.28656    | 50.1403 |
| 2      | 8.834         | MM   | 0.2443      | 9131.38770   | 623.03265    | 49.8597 |

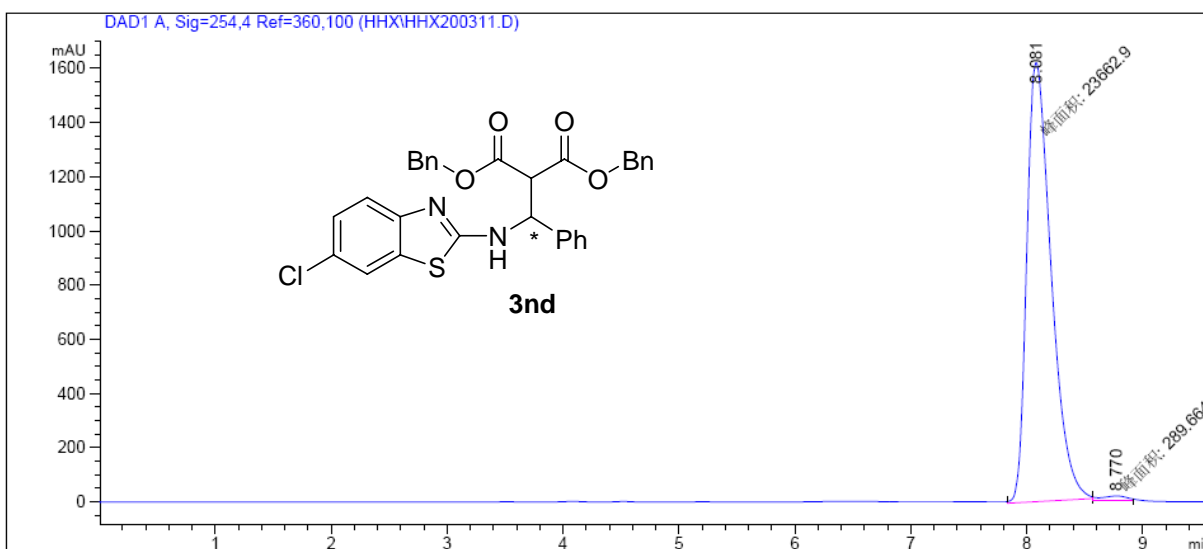

| Peak # | RetTime [min] | Type | Width [min] | Area [mAU*s] | Height [mAU] | Area %  |
|--------|---------------|------|-------------|--------------|--------------|---------|
| 1      | 8.081         | MM   | 0.2432      | 2.36629e4    | 1621.60645   | 98.7907 |
| 2      | 8.770         | MM   | 0.2644      | 289.66379    | 18.25688     | 1.2093  |



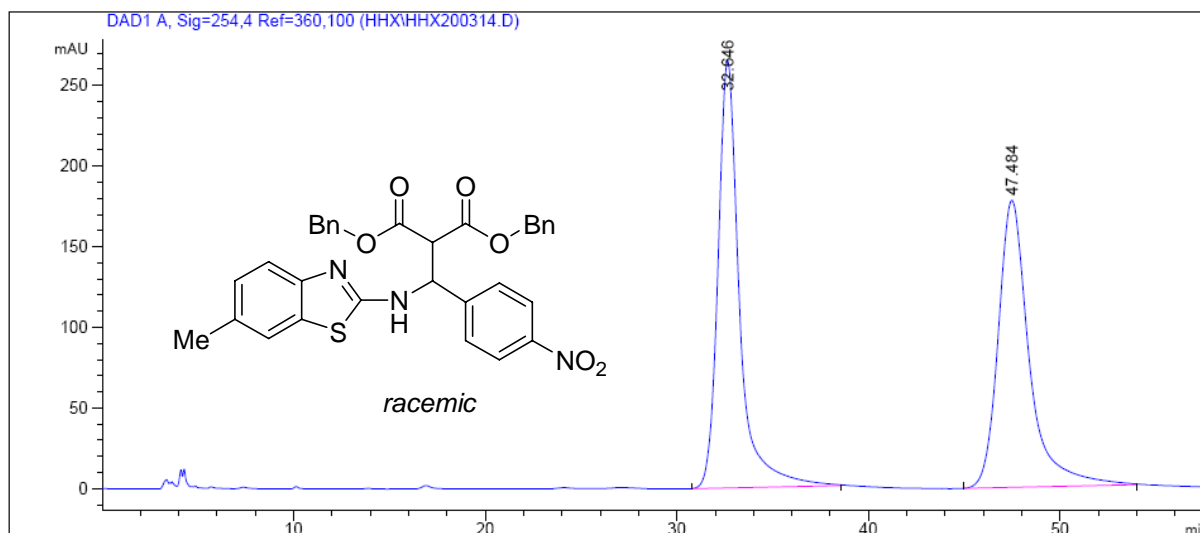

| Peak # | RetTime [min] | Type | Width [min] | Area [mAU*s] | Height [mAU] | Area %  |
|--------|---------------|------|-------------|--------------|--------------|---------|
| 1      | 32.646        | BB   | 1.1600      | 2.07014e4    | 264.83527    | 50.7521 |
| 2      | 47.484        | BB   | 1.6770      | 2.00879e4    | 177.94852    | 49.2479 |

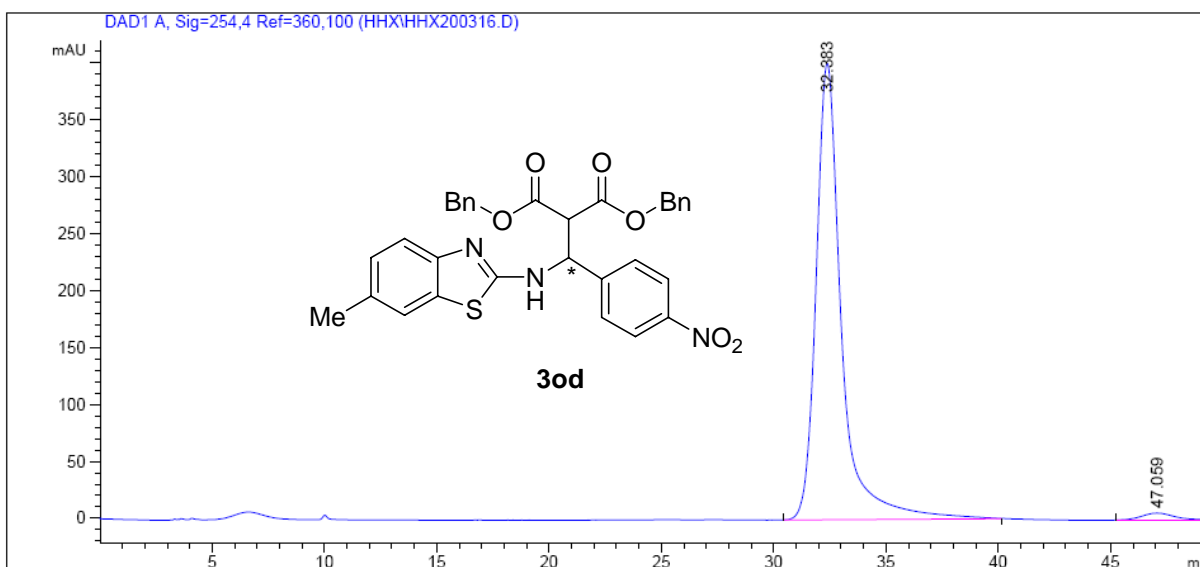

| Peak # | RetTime [min] | Type | Width [min] | Area [mAU*s] | Height [mAU] | Area %  |
|--------|---------------|------|-------------|--------------|--------------|---------|
| 1      | 32.383        | BB   | 1.1769      | 3.15822e4    | 400.12723    | 98.0224 |
| 2      | 47.059        | BBA  | 1.4265      | 637.18219    | 6.16145      | 1.9776  |

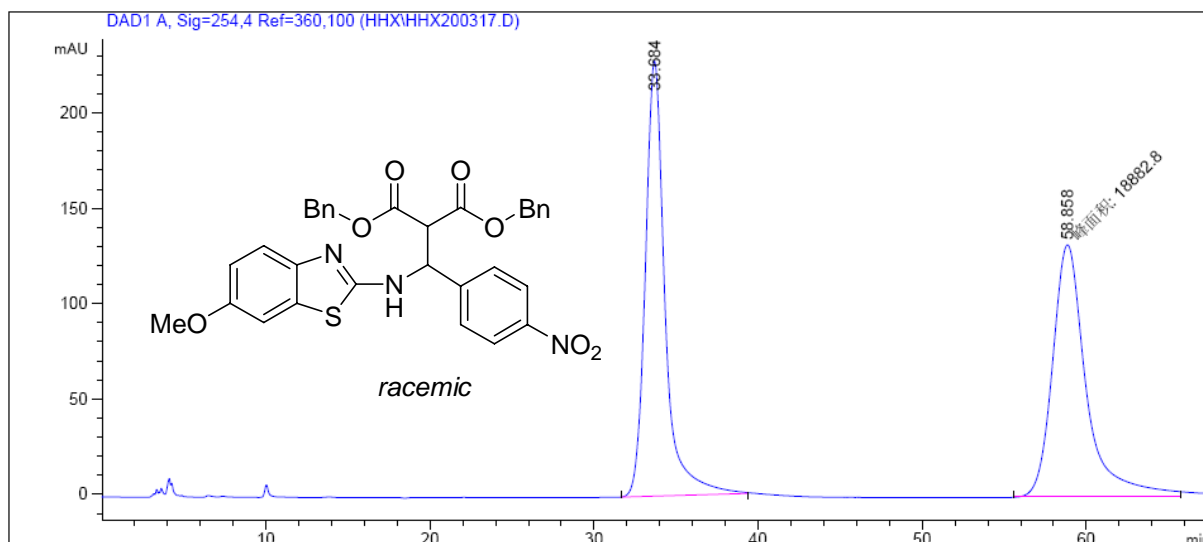

| Peak # | RetTime [min] | Type | Width [min] | Area [mAU*s] | Height [mAU] | Area %  |
|--------|---------------|------|-------------|--------------|--------------|---------|
| 1      | 33.684        | BB   | 1.2496      | 1.90312e4    | 228.06212    | 50.1958 |
| 2      | 58.858        | MM   | 2.3823      | 1.88828e4    | 132.10611    | 49.8042 |

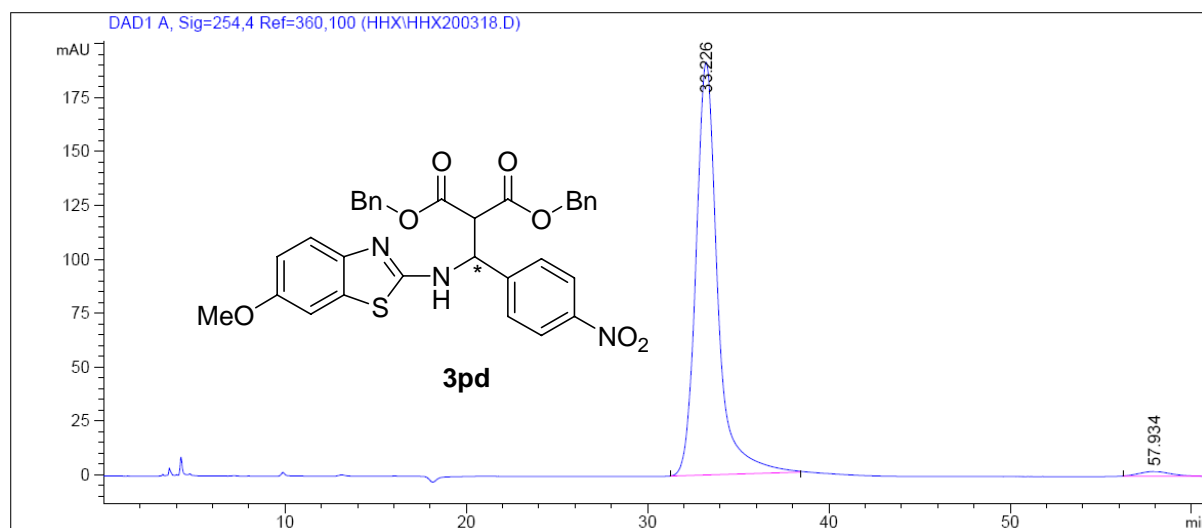

| Peak # | RetTime [min] | Type | Width [min] | Area [mAU*s] | Height [mAU] | Area %  |
|--------|---------------|------|-------------|--------------|--------------|---------|
| 1      | 33.226        | BB   | 1.2449      | 1.59022e4    | 191.48616    | 98.3614 |
| 2      | 57.934        | BB   | 1.4038      | 264.91986    | 2.23352      | 1.6386  |

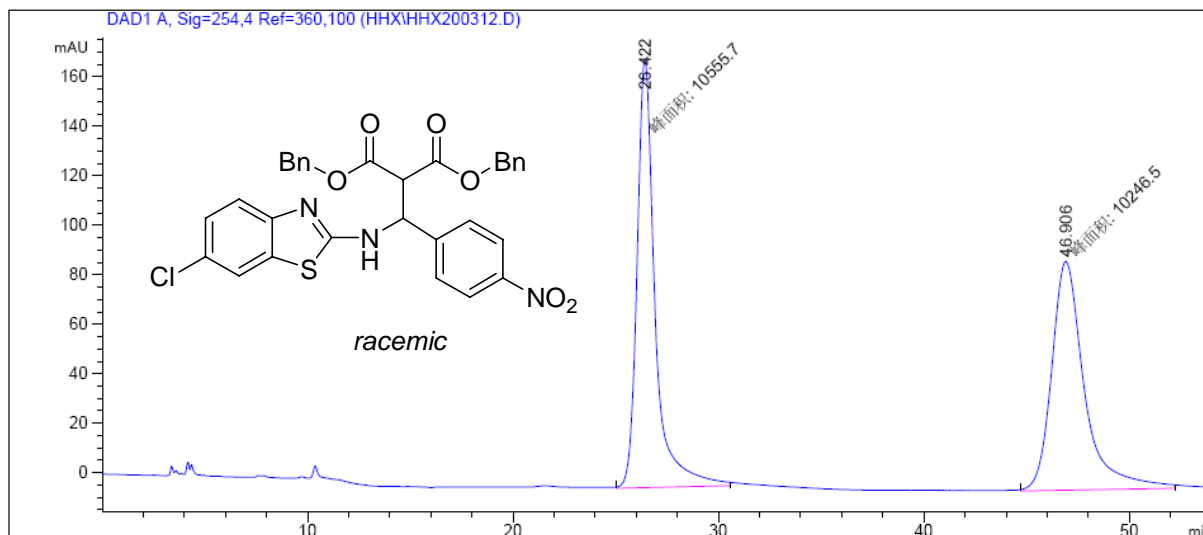

| Peak # | RetTime [min] | Type | Width [min] | Area [mAU*s] | Height [mAU] | Area %  |
|--------|---------------|------|-------------|--------------|--------------|---------|
| 1      | 26.422        | MM   | 1.0164      | 1.05557e4    | 173.09103    | 50.7430 |
| 2      | 46.906        | MM   | 1.8479      | 1.02465e4    | 92.41788     | 49.2570 |

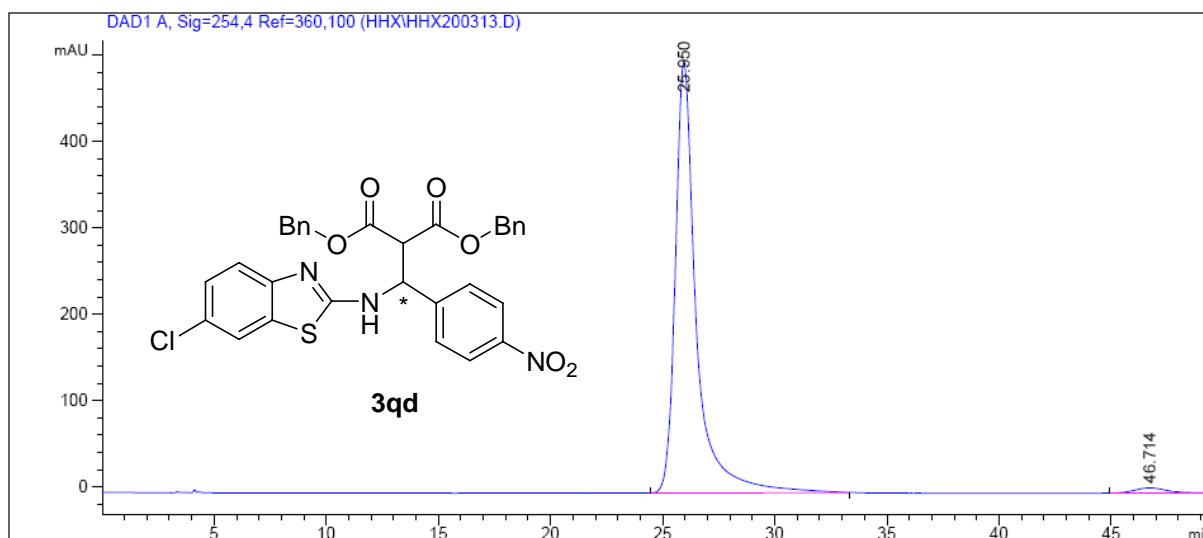

| Peak # | RetTime [min] | Type | Width [min] | Area [mAU*s] | Height [mAU] | Area %  |
|--------|---------------|------|-------------|--------------|--------------|---------|
| 1      | 25.950        | BB   | 0.9589      | 3.26008e4    | 498.56863    | 98.2358 |
| 2      | 46.714        | BB   | 1.2720      | 585.45605    | 5.92932      | 1.7642  |

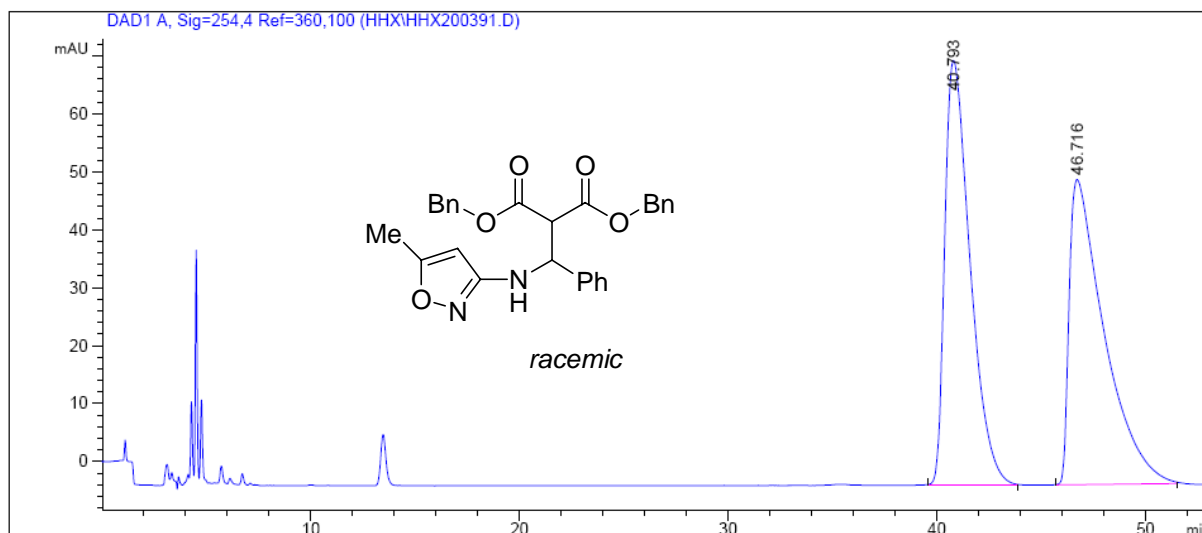

| Peak # | RetTime [min] | Type | Width [min] | Area [mAU*s] | Height [mAU] | Area %  |
|--------|---------------|------|-------------|--------------|--------------|---------|
| 1      | 40.793        | BB   | 1.2744      | 6165.91455   | 73.22169     | 50.1744 |
| 2      | 46.716        | BB   | 1.6329      | 6123.04736   | 52.64553     | 49.8256 |

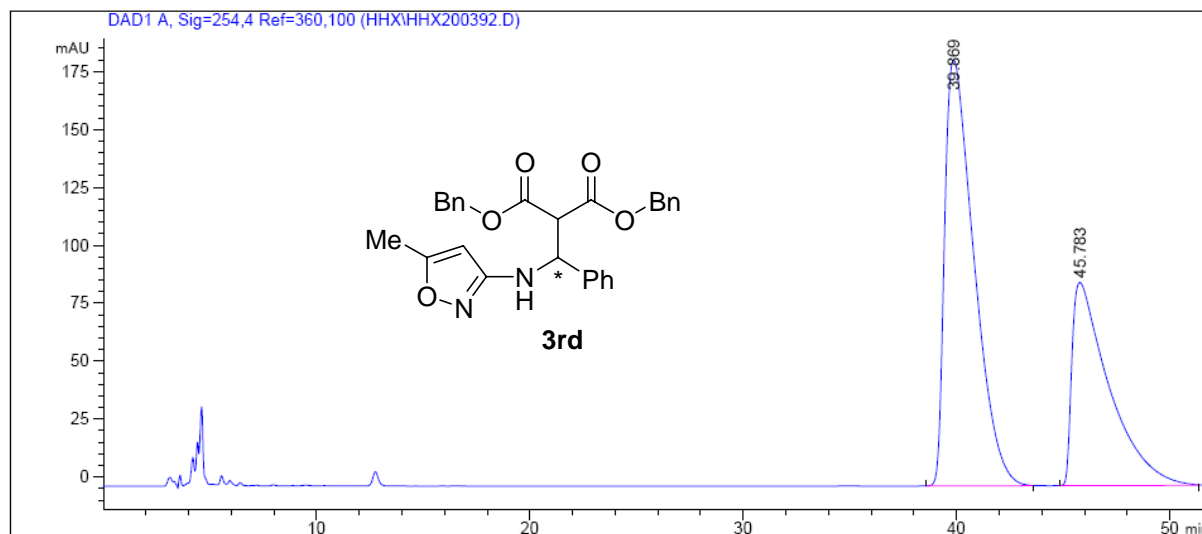

| Peak # | RetTime [min] | Type | Width [min] | Area [mAU*s] | Height [mAU] | Area %  |
|--------|---------------|------|-------------|--------------|--------------|---------|
| 1      | 39.869        | BB   | 1.4681      | 1.75195e4    | 183.79494    | 62.3243 |
| 2      | 45.783        | BB   | 1.6894      | 1.05907e4    | 87.67013     | 37.6757 |

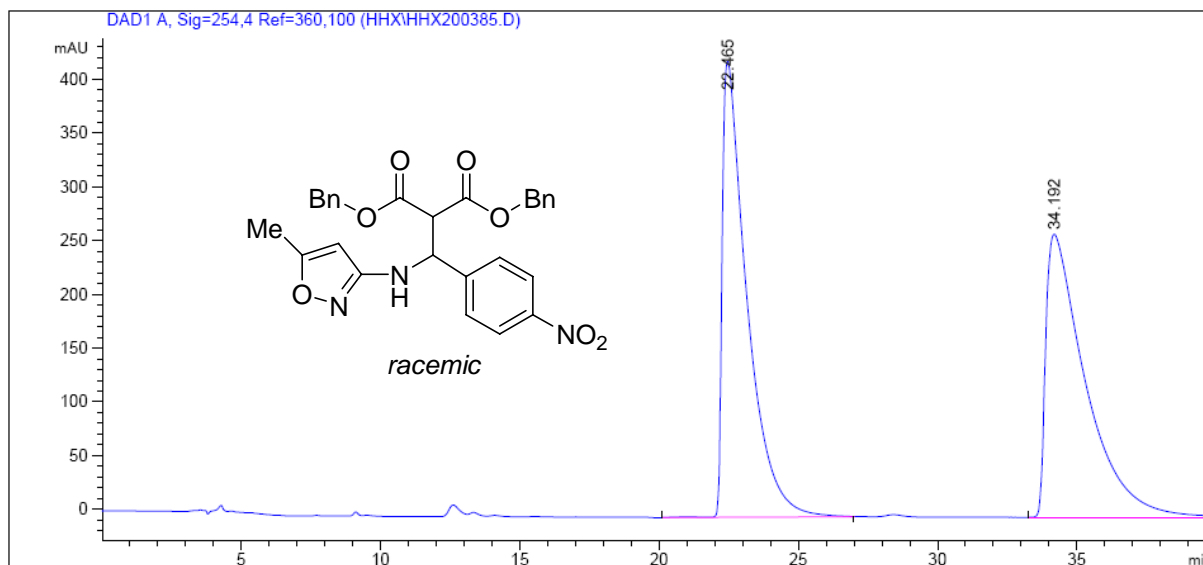

| Peak # | RetTime [min] | Type | Width [min] | Area [mAU*s] | Height [mAU] | Area %  |
|--------|---------------|------|-------------|--------------|--------------|---------|
| 1      | 22.465        | BB   | 0.8931      | 2.60541e4    | 423.87738    | 50.0479 |
| 2      | 34.192        | BBA  | 1.4207      | 2.60041e4    | 263.19443    | 49.9521 |

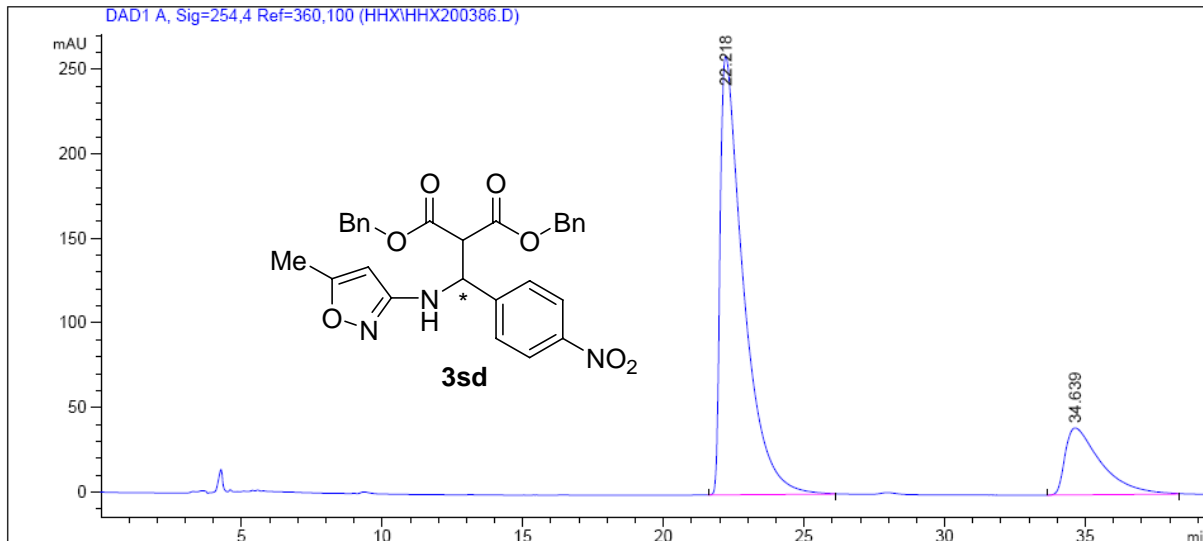

| Peak # | RetTime [min] | Type | Width [min] | Area [mAU*s] | Height [mAU] | Area %  |
|--------|---------------|------|-------------|--------------|--------------|---------|
| 1      | 22.218        | BB   | 0.8304      | 1.48998e4    | 259.27783    | 80.9859 |
| 2      | 34.639        | BB   | 1.3085      | 3498.21851   | 39.52939     | 19.0141 |

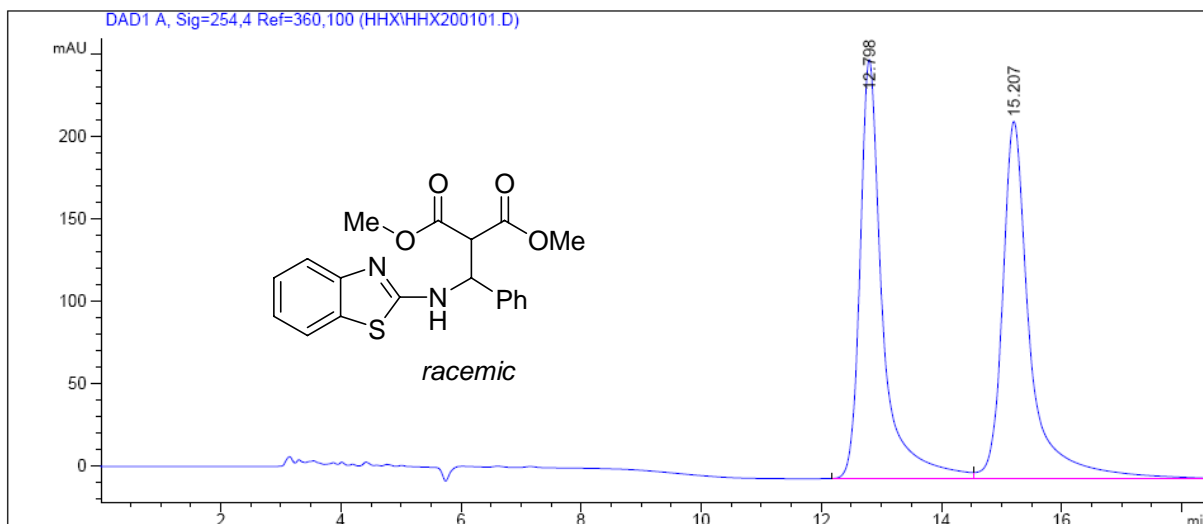

| Peak # | RetTime [min] | Type | Width [min] | Area [mAU*s] | Height [mAU] | Area %  |
|--------|---------------|------|-------------|--------------|--------------|---------|
| 1      | 12.798        | BV   | 0.3805      | 6641.60889   | 254.49521    | 49.0735 |
| 2      | 15.207        | VBA  | 0.4626      | 6892.40527   | 216.95569    | 50.9265 |

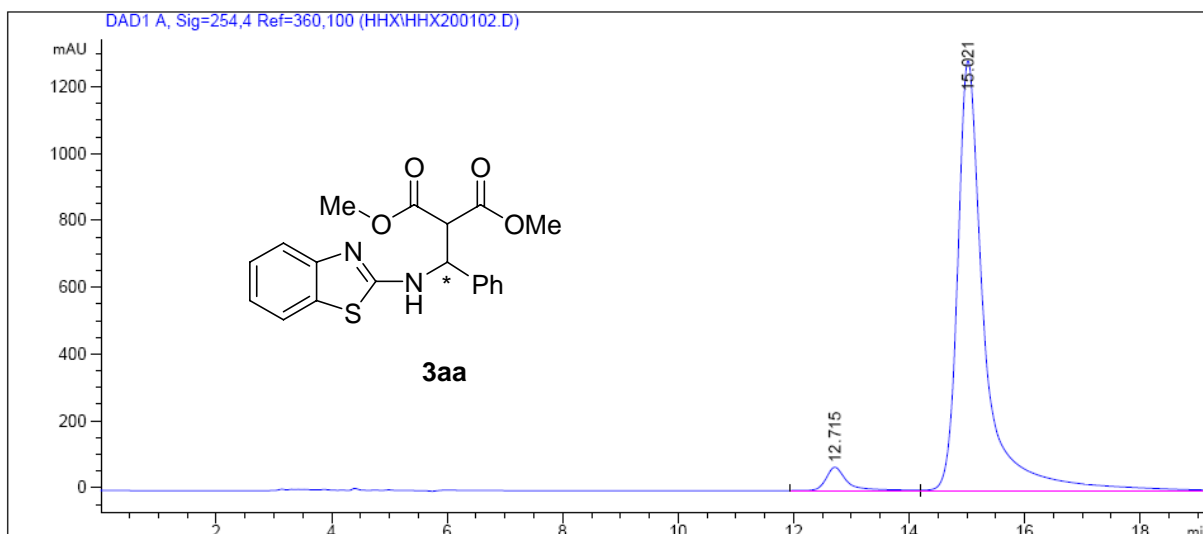

| Peak # | RetTime [min] | Type | Width [min] | Area [mAU*s] | Height [mAU] | Area %  |
|--------|---------------|------|-------------|--------------|--------------|---------|
| 1      | 12.715        | BV   | 0.3788      | 1817.27551   | 70.02228     | 4.2137  |
| 2      | 15.021        | VBA  | 0.4709      | 4.13110e4    | 1285.62329   | 95.7863 |

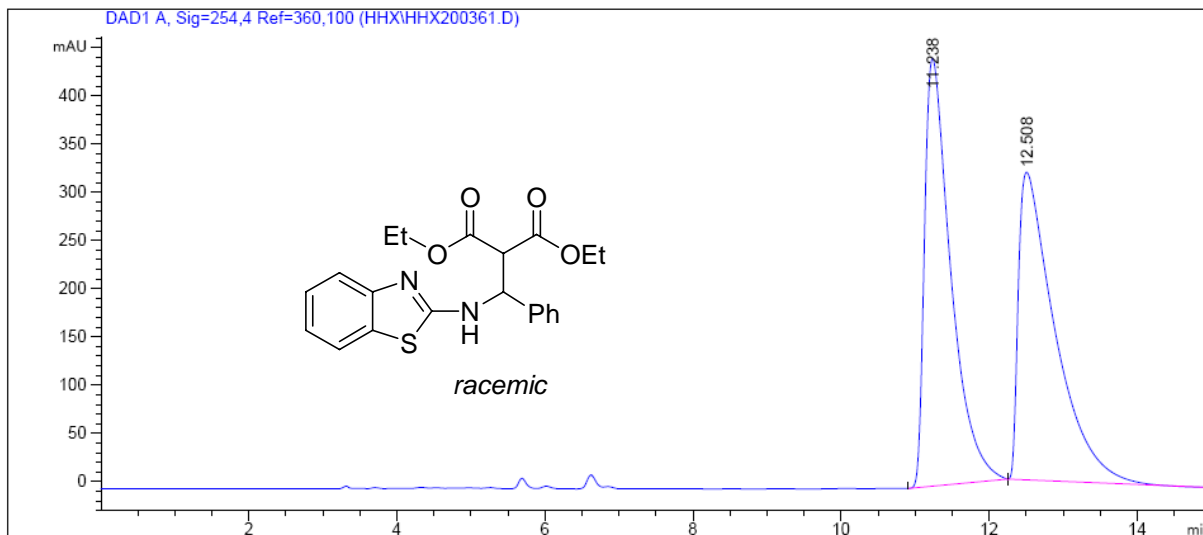

| Peak # | RetTime [min] | Type | Width [min] | Area [mAU*s] | Height [mAU] | Area %  |
|--------|---------------|------|-------------|--------------|--------------|---------|
| 1      | 11.238        | BB   | 0.3671      | 1.09164e4    | 443.61301    | 50.0083 |
| 2      | 12.508        | BBA  | 0.4952      | 1.09127e4    | 318.94205    | 49.9917 |

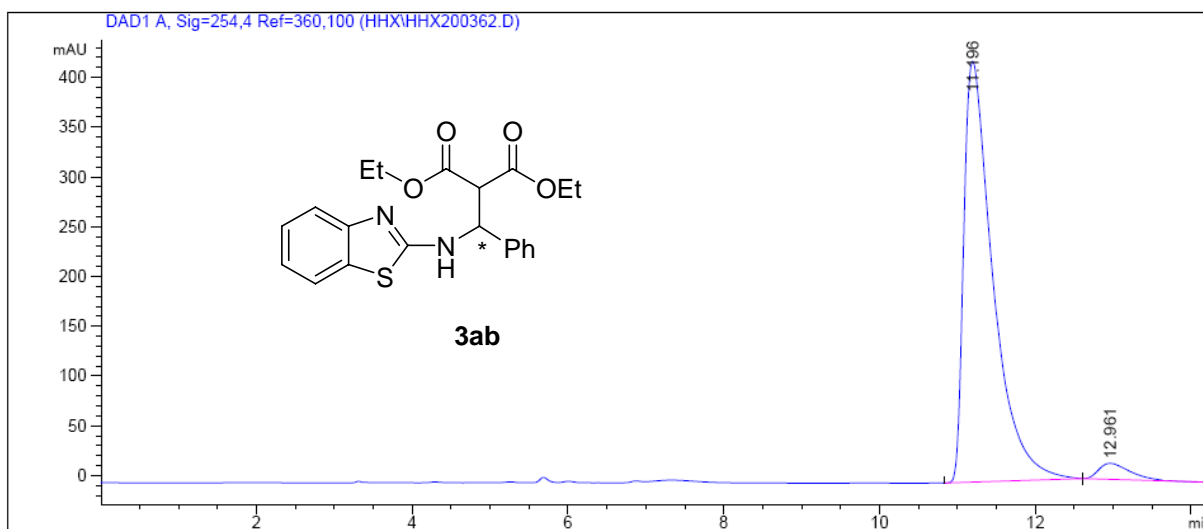

| Peak # | RetTime [min] | Type | Width [min] | Area [mAU*s] | Height [mAU] | Area %  |
|--------|---------------|------|-------------|--------------|--------------|---------|
| 1      | 11.196        | BB   | 0.3866      | 1.09626e4    | 422.67914    | 96.0652 |
| 2      | 12.961        | BBA  | 0.4311      | 449.02377    | 16.01732     | 3.9348  |

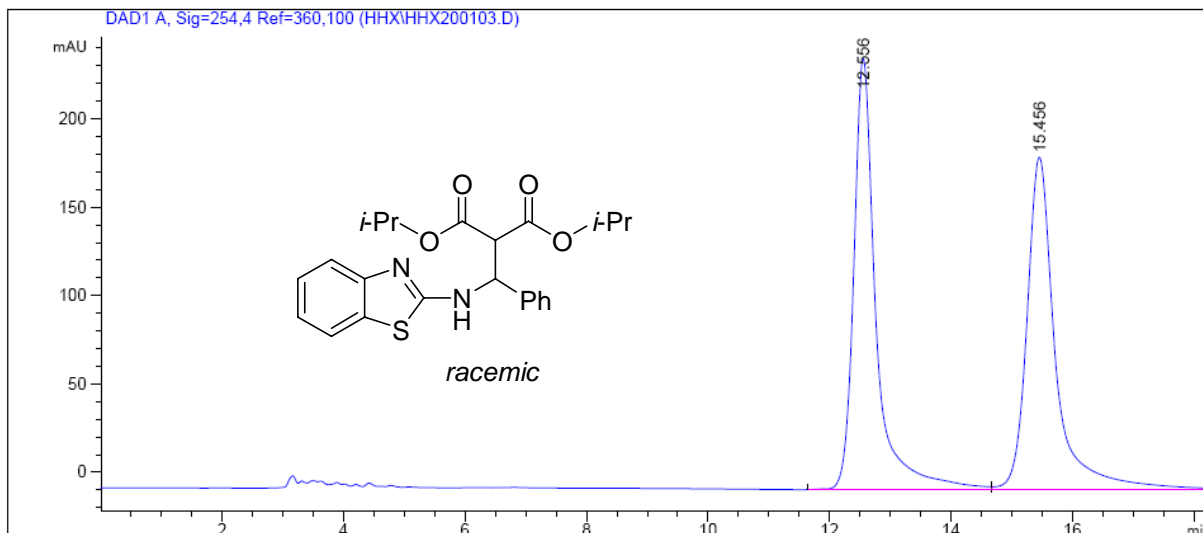

| Peak # | RetTime [min] | Type | Width [min] | Area [mAU*s] | Height [mAU] | Area %  |
|--------|---------------|------|-------------|--------------|--------------|---------|
| 1      | 12.556        | BV   | 0.3743      | 6233.04883   | 243.81277    | 50.2843 |
| 2      | 15.456        | VBA  | 0.4782      | 6162.56641   | 188.11639    | 49.7157 |

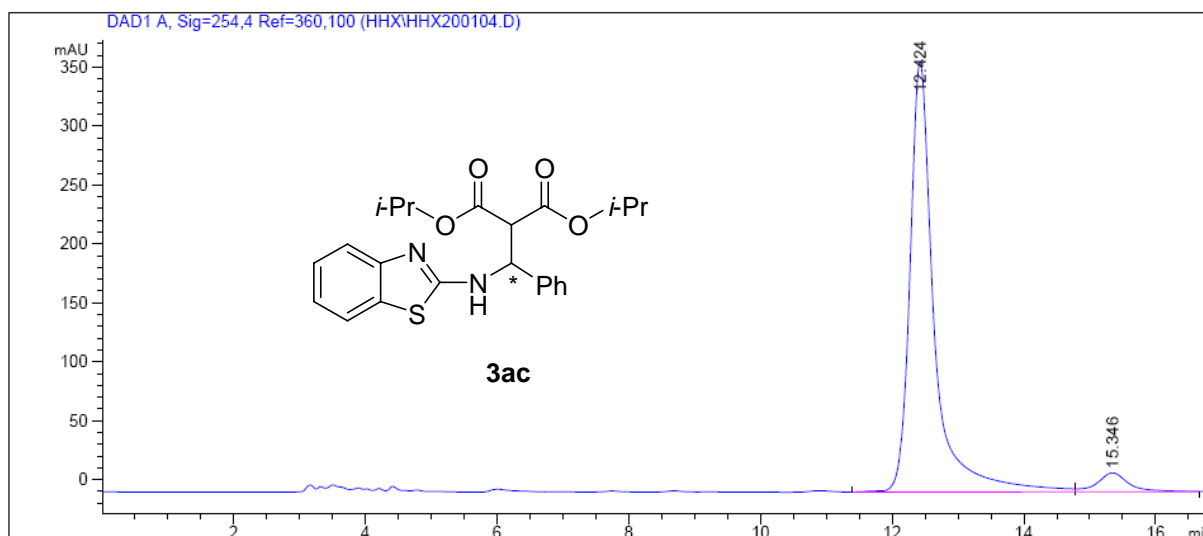

| Peak # | RetTime [min] | Type | Width [min] | Area [mAU*s] | Height [mAU] | Area %  |
|--------|---------------|------|-------------|--------------|--------------|---------|
| 1      | 12.424        | VV   | 0.3763      | 9396.74023   | 365.11203    | 94.6810 |
| 2      | 15.346        | VB   | 0.4848      | 527.89600    | 16.00393     | 5.3190  |



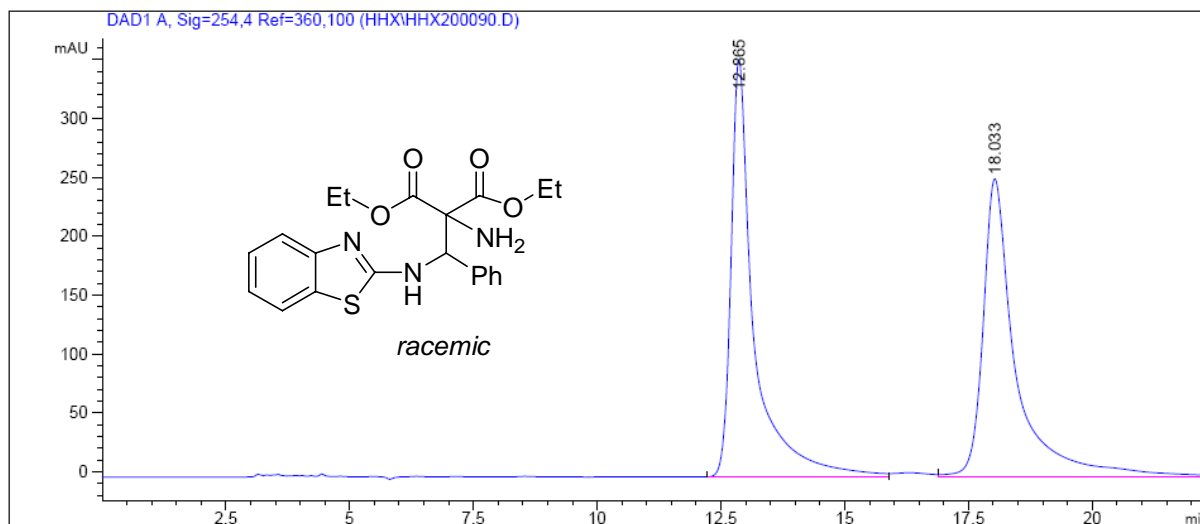

| Peak # | RetTime [min] | Type | Width [min] | Area [mAU*s] | Height [mAU] | Area %  |
|--------|---------------|------|-------------|--------------|--------------|---------|
| 1      | 12.865        | BV   | 0.4583      | 1.14893e4    | 354.32678    | 49.3377 |
| 2      | 18.033        | VBA  | 0.6597      | 1.17977e4    | 253.14731    | 50.6623 |

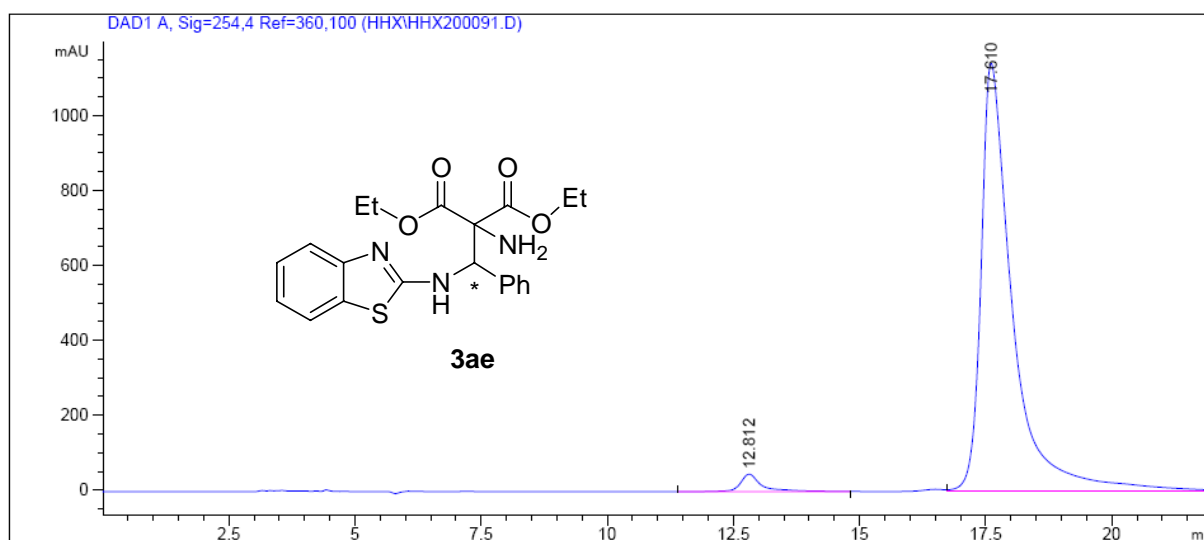

| Peak # | RetTime [min] | Type | Width [min] | Area [mAU*s] | Height [mAU] | Area %  |
|--------|---------------|------|-------------|--------------|--------------|---------|
| 1      | 12.812        | BB   | 0.4327      | 1411.81824   | 46.69998     | 2.7385  |
| 2      | 17.610        | VBA  | 0.6319      | 5.01420e4    | 1142.76855   | 97.2615 |

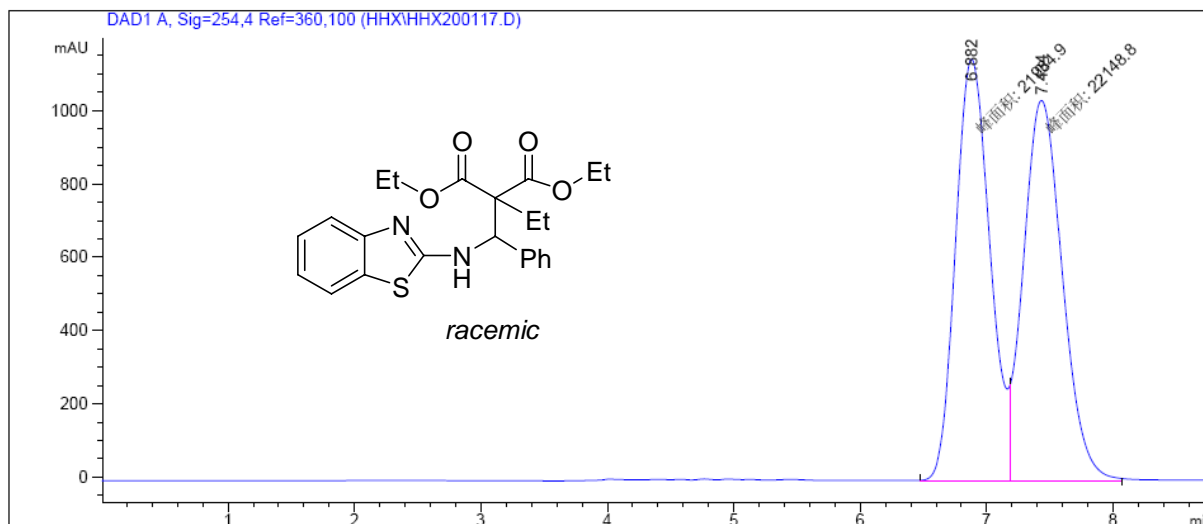

| Peak # | RetTime [min] | Type | Width [min] | Area [mAU*s] | Height [mAU] | Area %  |
|--------|---------------|------|-------------|--------------|--------------|---------|
| 1      | 6.882         | MM   | 0.3180      | 2.19849e4    | 1152.26453   | 49.8143 |
| 2      | 7.434         | MM   | 0.3550      | 2.21488e4    | 1039.84937   | 50.1857 |

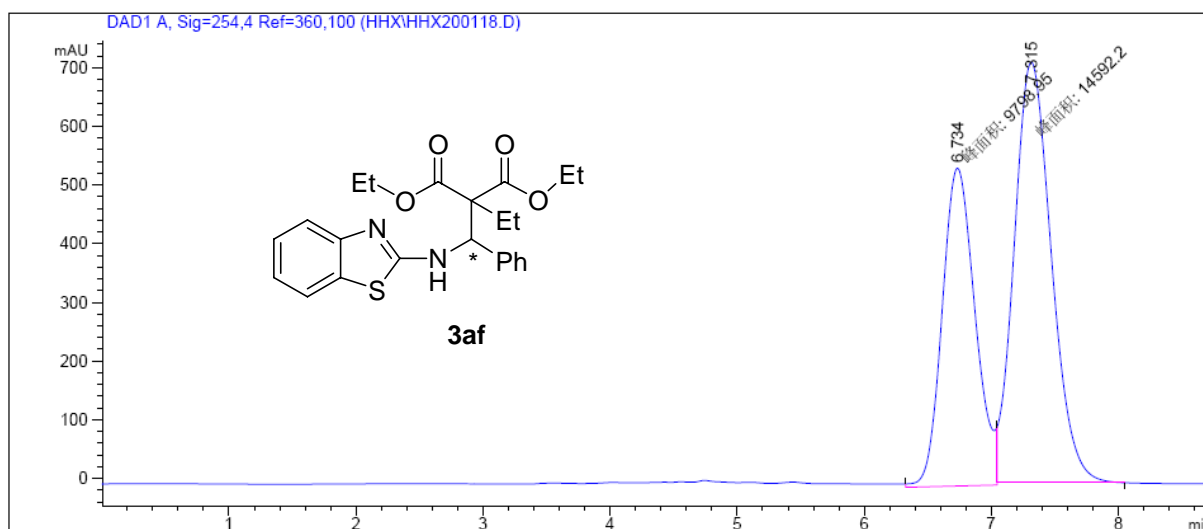

| Peak # | RetTime [min] | Type | Width [min] | Area [mAU*s] | Height [mAU] | Area %  |
|--------|---------------|------|-------------|--------------|--------------|---------|
| 1      | 6.734         | MM   | 0.3013      | 9798.94727   | 542.06250    | 40.1742 |
| 2      | 7.315         | MM   | 0.3391      | 1.45922e4    | 717.26166    | 59.8258 |
